# Supplementary material for: Mixed-methods study on pharmacies as contraception providers to Kenyan young people: who uses them and why?
Source: PubMed Central journal article supplement (PMC7348460; doi:10.1136/bmjopen-2019-034769), 2020-07-08
Supplement: bmjopen-2019-034769.draft_revisions.pdf [file bmjopen-2019-034769.draft_revisions.pdf]

# BMJ Open

BMJ Open is committed to open peer review. As part of this commitment we make the peer review history of every article we publish publicly available.

When an article is published we post the peer reviewers' comments and the authors' responses online. We also post the versions of the paper that were used during peer review. These are the versions that the peer review comments apply to.

The versions of the paper that follow are the versions that were submitted during the peer review process. They are not the versions of record or the final published versions. They should not be cited or distributed as the published version of this manuscript.

BMJ Open is an open access journal and the full, final, typeset and author-corrected version of record of the manuscript is available on our site with no access controls, subscription charges or pay-per-view fees (<http://bmjopen.bmj.com>).

If you have any questions on BMJ Open's open peer review process please email [info.bmjopen@bmj.com](mailto:info.bmjopen@bmj.com)

# BMJ Open

## Mixed-methods study on pharmacies as contraception providers to Kenyan young people: who uses them and why?

|                               |                                                                                                                                                                                                                                                                                                                                                                                                                                                                                                                                                                                                                                                                                                                                                                                                                                                                                                       |
|-------------------------------|-------------------------------------------------------------------------------------------------------------------------------------------------------------------------------------------------------------------------------------------------------------------------------------------------------------------------------------------------------------------------------------------------------------------------------------------------------------------------------------------------------------------------------------------------------------------------------------------------------------------------------------------------------------------------------------------------------------------------------------------------------------------------------------------------------------------------------------------------------------------------------------------------------|
| Journal:                      | <i>BMJ Open</i>                                                                                                                                                                                                                                                                                                                                                                                                                                                                                                                                                                                                                                                                                                                                                                                                                                                                                       |
| Manuscript ID                 | bmjopen-2019-034769                                                                                                                                                                                                                                                                                                                                                                                                                                                                                                                                                                                                                                                                                                                                                                                                                                                                                   |
| Article Type:                 | Original research                                                                                                                                                                                                                                                                                                                                                                                                                                                                                                                                                                                                                                                                                                                                                                                                                                                                                     |
| Date Submitted by the Author: | 04-Oct-2019                                                                                                                                                                                                                                                                                                                                                                                                                                                                                                                                                                                                                                                                                                                                                                                                                                                                                           |
| Complete List of Authors:     | Gonsalves, Lianne; World Health Organization, Department of Reproductive Health and Research including UNDP/UNFPA/UNICEF/WHO/World Bank Special Programme of Research, Development and Research Training in Human Reproduction (HRP); Swiss Tropical and Public Health Institute<br>Wyss, Kaspar; Swiss Tropical and Public Health Institute; University of Basel<br>Cresswell , Jenny; World Health Organization, Department of Reproductive Health and Research including UNDP/UNFPA/UNICEF/WHO/World Bank Special Programme of Research, Development and Research Training in Human Reproduction (HRP)<br>Waithaka, Michael; International Centre for Reproductive Health Kenya Gichangi, Peter; International Centre for Reproductive Health Kenya; University of Nairobi, Department of Human Anatomy<br>Martin Hilber, Adriane; Swiss Tropical and Public Health Institute; University of Basel |
| Keywords:                     | REPRODUCTIVE MEDICINE, Community child health < PAEDIATRICS, PUBLIC HEALTH, QUALITATIVE RESEARCH                                                                                                                                                                                                                                                                                                                                                                                                                                                                                                                                                                                                                                                                                                                                                                                                      |
|                               |                                                                                                                                                                                                                                                                                                                                                                                                                                                                                                                                                                                                                                                                                                                                                                                                                                                                                                       |

SCHOLARONE™  
Manuscripts

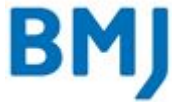

I, the Submitting Author has the right to grant and does grant on behalf of all authors of the Work (as defined in the below author licence), an exclusive licence and/or a non-exclusive licence for contributions from authors who are: i) UK Crown employees; ii) where BMJ has agreed a CC-BY licence shall apply, and/or iii) in accordance with the terms applicable for US Federal Government officers or employees acting as part of their official duties; on a worldwide, perpetual, irrevocable, royalty-free basis to BMJ Publishing Group Ltd ("BMJ") its licensees and where the relevant Journal is co-owned by BMJ to the co-owners of the Journal, to publish the Work in this journal and any other BMJ products and to exploit all rights, as set out in our [licence](#).

The Submitting Author accepts and understands that any supply made under these terms is made by BMJ to the Submitting Author unless you are acting as an employee on behalf of your employer or a postgraduate student of an affiliated institution which is paying any applicable article publishing charge ("APC") for Open Access articles. Where the Submitting Author wishes to make the Work available on an Open Access basis (and intends to pay the relevant APC), the terms of reuse of such Open Access shall be governed by a Creative Commons licence – details of these licences and which [Creative Commons](#) licence will apply to this Work are set out in our licence referred to above.

Other than as permitted in any relevant BMJ Author's Self Archiving Policies, I confirm this Work has not been accepted for publication elsewhere, is not being considered for publication elsewhere and does not duplicate material already published. I confirm all authors consent to publication of this Work and authorise the granting of this licence.

# Mixed-methods study on pharmacies as contraception providers to Kenyan young people: who uses them and why?

Lianne Gonsalves<sup>123</sup>, Kaspar Wyss<sup>23</sup>, Jenny A Cresswell<sup>1</sup>, Michael Waithaka<sup>4</sup>, Peter Gichangi<sup>456</sup>, Adriane Martin Hilber<sup>23</sup>

<sup>1</sup>Department of Reproductive Health and Research including UNDP/UNFPA/UNICEF/WHO/World Bank Special Programme of Research, Development and Research Training in Human Reproduction (HRP), World Health Organization, Geneva, Switzerland

<sup>2</sup>Swiss Tropical and Public Health Institute (Swiss TPH), Basel, Switzerland

<sup>3</sup>University of Basel, Basel, Switzerland

<sup>4</sup>International Centre for Reproductive Health Kenya, Mombasa, Kenya

<sup>5</sup>Department of Human Anatomy, University of Nairobi, Nairobi, Kenya

<sup>6</sup>Ghent University, Ghent, Belgium

## Corresponding author information:

Lianne Gonsalves

Address: World Health Organization, Avenue Appia 20, 1211 Geneva, Switzerland

Telephone: +41 22 791 29 70

Email address: [gonsalvesl@who.int](mailto:gonsalvesl@who.int)

Word count, excluding title page, abstract, references, figures and tables

3961

## Abstract: 300 words

### *Background*

Public sector contraceptive services often struggle to meet the needs of young people around the world. Instead, private pharmacies have been demonstrated to be a relied-upon source of modern contraception for young people.

### *Objectives*

This study sought to answer two questions: 1) what are the characteristics of young Kenyans aged 18-24 who use contraception obtained at pharmacies, and 2) why are pharmacies appealing sources of contraception?

### *Design and Setting*

This was a mixed-methods study in one peri-urban part of Kwale County, Kenya. Methods included: cross-sectional survey (N=740); six focus group discussions; 18 in-depth interviews; and 25 key informant interviews. Quantitative data analysis identified factors pushing young people to pharmacies for contraception versus other sources. Qualitative data analysis identified reasons pharmacies were perceived to be appealing to young clients.

### Participants

Participants were: 1) young people aged 18-24 from the study area, including a subset who had recently purchased contraception from a pharmacy; or 2) pharmacy personnel and pharmacy stakeholders.

### Results

Among surveyed participants, 59% had used contraception purchased from a pharmacy at last sex. In multivariable analysis, participants who had used a condom or emergency contraception as well as those living alone were significantly more likely to get contraception from pharmacies. Pharmacies were valued for their: convenience; privacy; non-judgmental and personable staff; service speed; and predictable, affordable prices.

### Conclusions

Our findings indicate a higher percentage of young people than previously reported use pharmacies for contraception. Our inclusion of emergency contraception users and young men partially explain this. Additionally, pharmacies were perceived to be everything that health facilities were not: fast, private and non-limiting. Policymakers should recognize the role of pharmacies as contraception providers and look for opportunities to link pharmacies to the public health system. This would create a network of accessible and appealing contraception services for young people.

### Article Summary

- The phrasing of survey questions affected our ability to distinguish differences between young men versus young women who obtain contraception.
- One participant group (young people who had recently purchased contraception from a pharmacy) was recruited from five purposively selected pharmacies: this may limit the generalizability of the findings.
- This study is strengthened by its mixed methods design and inclusion of both pharmacy personnel and young people to triangulate research findings on a sensitive subject.

## INTRODUCTION

Young people need access to contraception: however, around the world, and in low- and middle-income countries in particular, public sector contraceptive services are not meeting this need. Indeed, young people are often reluctant to access contraception at public health facilities where they may encounter a lack of privacy, biased providers, and limited contraceptive options, in addition to broader financial, legal, social, and cultural barriers. [1, 2]

Data from 61 low- and middle-income countries estimated that 33 million young women aged 15-24 had an unmet need for family planning. [3] In Kenya, where this study took place, the 2014 Demographic and Health Survey found that among currently married women, 23% of 15-19 year-olds and 19% of 20-24 year-olds have an unmet need for family planning. [4] Among sexually active unmarried women, 50% of 15-19 year-olds and 31% of 20-24 year-olds were not using any contraceptive method. [4]

Other parts of the health system may be able to step in to help fill this gap. In Kenya and in the region, private pharmacies have been demonstrated to be a relied-upon source of modern contraception for young people [5-8]. Additional research has indicated that when contraception is introduced in pharmacies, access improved for young people.[9, 10] An analysis of 33 sub-Saharan African countries found that commercial drug sellers, including pharmacies, were the source of the most recent contraceptive method for nearly one in five young people between 15-24 years of age. [9] When also factoring in other informal and non-medical providers, including shops, these sources together serviced nearly half of women age 15-19. [9]

Kenya's National Family Planning Guidelines allow for the provision of several barrier methods and short-acting forms of contraception to be dispensed in private retail pharmacies [11](colloquially referred to as 'chemists'). These include male and female condoms, emergency contraception (ECP), oral contraceptive pills, and injectable contraception (which can be dispensed but not administered). However, despite their demonstrable popularity among young people, there is little data on the individual-level circumstances or characteristics of young people that would drive them to pharmacies for contraception. Therefore, this mixed methods study sought to answer two questions: 1) what are the characteristics of young people who use contraception obtained at pharmacies, and 2) why are pharmacies appealing sources of contraception to young people?

## METHODS

This analysis was part of a broader, mixed-methods study describing how young people (aged 18-24) in Kwale County obtain contraception from pharmacies. Kwale County is one of six counties in Kenya's former Coast region: the study itself took place in the peri-urban area of Kwale Town and Ukunda, as well as the stretch of highway connecting the two. Young people between the ages of 15-24 were projected to make up 19% of the County's population by 2018.[12] In 2014, contraception prevalence in the county was 38%, lower than the national average of 53%. [13]

This study was partly-nested in the ARMADILLO randomized controlled trial (RCT)[14], assessing the effect of an unrelated digital health intervention on SRH-related outcomes for young people aged 18-24. Data collection took place between October 2017 and March 2018. We used several methods (captured in Table 1) to triangulate from the perspectives of pharmacy personnel and young people themselves, an understanding of what kinds of young people purchase contraception from pharmacies and why pharmacies are considered appealing sources of contraception.

### Table 1 Study Methods

| Method                          | N                                                   | Eligibility criteria                                                                                                                                                                                                                             | Relevant topics addressed                                                                                                                                                 |
|---------------------------------|-----------------------------------------------------|--------------------------------------------------------------------------------------------------------------------------------------------------------------------------------------------------------------------------------------------------|---------------------------------------------------------------------------------------------------------------------------------------------------------------------------|
| <b>Cross-sectional survey*</b>  | <b>740</b>                                          | <ul style="list-style-type: none"> <li>• Age 18-24</li> <li>• Literate</li> <li>• Have their own mobile phone (with them at time of recruitment) and report regular use</li> <li>• Report current use of text messaging</li> </ul>               | <ul style="list-style-type: none"> <li>• Contraception used at last sex and source</li> <li>• Demographic and behavioral characteristics</li> </ul>                       |
| <b>Focus group discussions*</b> | <b>6 (58 participants)</b>                          | <ul style="list-style-type: none"> <li>• Age 18-24</li> <li>• Community members</li> </ul>                                                                                                                                                       | <ul style="list-style-type: none"> <li>• Sources of contraception for young people</li> <li>• Characteristics of young people who use each source</li> </ul>              |
| <b>In-depth interviews</b>      | <b>18</b>                                           | <ul style="list-style-type: none"> <li>• Age 18-24</li> <li>• Recently purchased contraception at pharmacy</li> </ul>                                                                                                                            | <ul style="list-style-type: none"> <li>• Reasons for having purchased contraception from pharmacy</li> <li>• What was valued (and not valued) about experience</li> </ul> |
| <b>Key-informant interviews</b> | <b>19 (pharmacy personnel)<br/>6 (stakeholders)</b> | <ul style="list-style-type: none"> <li>• Age 18+</li> <li>• Pharmacy personnel (any role) OR</li> <li>• Pharmacy-related stakeholder (Ministry of Health; regulatory agency; professional association; non-governmental organization)</li> </ul> | <ul style="list-style-type: none"> <li>• Characteristics of young people who purchase contraception</li> <li>• What clients appreciate about experience</li> </ul>        |

\* Methods which were nested in the broader ARMADILLO Study, a digital health intervention RCT. Inclusion/exclusion criteria for these nested methods were determined by ARMADILLO's objectives.

To capture the perspectives of young people, a cross-sectional survey of 740 young people age 18-24 captured demographic information and contraceptive use patterns, including source of last contraception (these questions were one section of a broader survey conducted as part of the baseline assessment for the ARMADILLO trial). The sample size was calculated based on the ARMADILLO trial's primary outcome – the full protocol for the trial has been previously published[14], along with details of participants recruited.[15] In October 2017, data collectors enumerated all households with young people in the study area using a map provided by the Kenya National Bureau of Statistics. In February 2018, a random selection of households and random selection of one youth per household was generated for the purposes of participant recruitment.

Additionally, six Focus Group Discussions were conducted with young people age 18-24, purposively recruited from the community by data collectors. Finally, we conducted in-depth interviews with 18 young people aged 18-24 who had recently purchased contraception from pharmacies. We identified these young participants in one of two ways. First, we stationed a young data collector outside of well-trafficked pharmacies over three evenings, who recruited young people purchasing contraception. Second, several pharmacists in the study area were provided with leaflets with study information and requested to provide these to young contraception purchasers at the end of a transaction.

To capture the perspectives of pharmacy personnel, data collectors mapped all the private, retail pharmacies in the study area using a digital form with an embedded geolocator. A random subset of pharmacies was generated, and data collectors visited these to conduct key informant interviews with pharmacy personnel. Data collectors were instructed to interview the first person behind the counter they met, regardless of rank or level of training – 19 interviews in total were conducted. An additional six key-informant interviews were conducted with stakeholders from the Pharmacy and Poisons Board, Ministry of Health, professional associations, and non-governmental organizations: these were conducted in Ukunda, Mombasa, or Nairobi.

## Data collection

We obtained informed consent from all participants prior to participation. All data was collected in English, Swahili, or a mix of the two, depending on participants' preference. Quantitative surveys were completed using webforms on a tablet. Data collectors entered responses save for the questions related to participants' sexual and contraceptive use history; here, to reduce potential discomfort, participants entered their own responses. Interviews and FGDs used semi-structured guides. Qualitative data collection ceased upon reaching saturation. All qualitative methods used audio-recording (with participant permission). All study activities were conducted in a private location. Data collectors, speaking both English and Swahili, were recruited from the study area and specifically trained for this study.

This study received ethics approval from the Ethikkommission Nordwest- und Zentralschweiz (EKNZ) (Req-2017-00389) in Basel, Switzerland, as well as the University of Nairobi/Kenyatta National Hospital in Nairobi, Kenya (P274/05/2017). The ARMADILLO RCT also received ethics approval from the World Health Organization (Protocol WHO A65892), and is registered with the ISRCTN Registry (ISRCTN85156148).

## Patient and public involvement

- How was the development of the research question and outcome measures informed by patients' priorities, experience, and preferences?

*The qualitative outcomes of this study directly reflect young people's experience and preference (we present WHY young people find pharmacies appealing).*

- How did you involve patients in the design of this study?

*Young people were directly involved in parts of the study's design. We relied on their insight and lived experience to determine how young people would feel most comfortable being recruited. Based on this, we jointly designed our recruitment and consenting procedures.*

- Were patients involved in the recruitment to and conduct of the study?

*Our survey data collection team consisted of young people recruited from the study area (Kwale County). Qualitative method data collectors were also young people recruited from both Kwale and Mombasa Counties.*

- How will the results be disseminated to study participants?

*No specific dissemination to participants was budgeted for. A dissemination meeting involving local, county, and national stakeholders (including some adult study participants) took place in June, 2019. At*



1  
2  
3 *the meeting, several young data collectors were invited to attend and they provided commentary on the*  
4 *findings.*  
5  
6

## 7 **Analysis**

8 Quantitative data was analyzed in Stata Version 14. The subject of the analyses (as described in Figure 1)  
9 were survey participants who reported using one of four contraception commodities available in  
10 pharmacies (either male or female condom, ECP, daily contraceptive pills, or injectable contraception) at  
11 last sex *and* who reported their source. Excluded were those participants who had not used  
12 contraception at last sex, who had not used a contraceptive commodity (withdrawal method, calendar  
13 days), who could not remember where they had obtained their method and/or who had obtained it  
14 from a partner or friend. We developed a dichotomous ‘source of family planning’ outcome,  
15 distinguishing between ‘pharmacy’ and ‘any other source’. The latter included any public or private  
16 health facility, community-based distributors, non-governmental organizations, shops, schools,  
17 supermarkets. Following descriptive statistics, bivariate log binomial regressions assessed the  
18 association between the outcome and each behavioral/sociodemographic variable of interest. Any  
19 analysis showing a  $p < .2$  moved the variable into a multivariable Poisson regression model with robust  
20 95% CIs.  
21  
22

### 23 **Figure 1 Flow Diagram of Study Participants**

24  
25 All qualitative data was transcribed verbatim and then translated (if necessary) into English. We adopted  
26 an iterative approach to data collection and analysis, allowing question guides to be modified based on  
27 emerging themes. Qualitative analysis was conducted in Atlas.ti Version 8 and relied on thematic  
28 analysis, with inductive and deductive (the latter based on the research objective) coding of a subset of  
29 transcripts to develop and refine a coding framework.  
30  
31

## 32 **RESULTS**

### 33 **Survey sample characteristics**

34  
35 As seen in Table 2, of the 740 young people aged 18-24 who participated in the cross-sectional survey,  
36 512 (69%) had ever had sex. Male condoms were the single most popular form of contraception  
37 purchased, used by 190 of the 274 (69%) participants who used contraception at last sex. Of the  
38 participants indicating that they used a modern contraceptive at last sex (N=263), 154 (59%) had  
39 obtained it from a private, retail pharmacy (hereafter, ‘pharmacy’). Of the 512 participants, 259 (51%)  
40 indicated they used a contraceptive method that is available in pharmacies at last sex. A majority of  
41 these participants (59%) also obtained their contraception from a pharmacy, while an additional 11%  
42 obtained it from a shop. Those obtaining it from a public health facility (dispensary, health centre or  
43 hospital) comprised another 18% in total.  
44  
45

46 **Table 2 Baseline characteristics**

| 47 <b>All surveyed participants (N=740)</b>        |               |
|----------------------------------------------------|---------------|
| 48 Ever had sex                                    | 512/740 (69%) |
| 49 Used any contraception at last sex              | 274/512 (54%) |
| 50 Used a modern contraceptive at last sex         | 263/512(51%)  |
| 51 Used pharmacy-available contraception*          | 259/512 (51%) |
| 52 <b>Where contraception was obtained (N=259)</b> |               |
| 53 Pharmacy                                        | 59%           |
| 54 Shop                                            | 11%           |

|                                                                             |     |
|-----------------------------------------------------------------------------|-----|
| Public dispensary or health centre                                          | 10% |
| Hospital                                                                    | 8%  |
| NGO, private doctor                                                         | 4%  |
| Community-based distributor, school, supermarket                            | 2%  |
| <i>Other person**</i>                                                       | 3%  |
| <i>Other source (not specified)/Don't know **</i>                           | 3%  |
| <b>Included participants using pharmacy-available contraception (N=243)</b> |     |
| Age                                                                         |     |
| 18-19                                                                       | 18% |
| 20-24                                                                       | 82% |
| Sex                                                                         |     |
| Male                                                                        | 54% |
| Female                                                                      | 46% |
| Education (highest level attended)                                          |     |
| Primary or below                                                            | 40% |
| Secondary                                                                   | 47% |
| Post-secondary                                                              | 14% |
| Relationship status                                                         |     |
| Single                                                                      | 33% |
| Dating                                                                      | 47% |
| Married/Cohabiting                                                          | 19% |
| Any children                                                                |     |
| No                                                                          | 84% |
| Yes                                                                         | 16% |
| Living situation                                                            |     |
| Lives alone                                                                 | 16% |
| Lives with family (dependent)                                               | 70% |
| Lives with child or partner                                                 | 14% |
| Contraception used***                                                       |     |
| Male condom                                                                 | 72% |
| Female condom                                                               | 2%  |
| ECP                                                                         | 12% |
| Daily contraceptive pills                                                   | 3%  |
| Injection                                                                   | 10% |

\*these included male or female condom, emergency contraception (ECP), daily contraceptive pills, and injectable contraception

\*\*these were excluded from analysis

\*\*\*Participants could enter one contraceptive method

Of the 243 participants who were included in bivariate and multivariable analyses, 54% were male, 61% had attended secondary school or higher, and 70% were dependents (living with parents, grandparents, or other older family members). Among participants included in the analysis, male condoms remained the most popular (72%), followed by ECP (12%), and injection (10%). Supplementary Table 1 presents selected characteristics of the 243 participants disaggregated by whether they obtained contraception at a pharmacy, shop, or any other source: most shop users were male and purchased condoms.

### Characteristics of young people who use a pharmacy to access contraception

Bivariate analyses (Table 3) indicated there was no evidence of an association between either age, sex, or education and a young person's contraception being from a pharmacy. There was however an association between pharmacy-purchased contraception and a participant's relationship status, and whether they had children. The greatest predictors of whether a young person had visited a pharmacy, were the type of contraception they purchased and with whom they lived. Following multivariate analysis (Table 3), there remained strong evidence of an association between pharmacy purchase of contraception and a young person's living situation as well as the type of contraception they used. Young people living alone were almost twice as likely to have sourced contraception from a pharmacy as those living with a child or partner (Adjusted PR 1.96, 95% CI [1.07-3.59]). Young people using condoms were more likely to have visited a pharmacy as compared with pill/injection users (Adjusted PR 1.87, 95% CI [1.02- 3.43]). However, use of ECP remained the greatest predictor of a pharmacy purchase (Adjusted PR 2.27 as compared with pill/injection use 95% CI [1.21-4.27]).

**Table 3 Bivariate and multivariable analysis to identify personal characteristics that may be associated with a young person obtaining contraception from a pharmacy (vs any other source)**

|                               | Purchased contraception from pharmacy | Unadjusted Prevalence Ratio (PR) [95% CI] | p-value* | Adjusted Prevalence Ratio (PR) [95% CI] | p-value |
|-------------------------------|---------------------------------------|-------------------------------------------|----------|-----------------------------------------|---------|
| All                           | 153/243 (63%)                         |                                           |          |                                         |         |
| Age                           |                                       |                                           |          |                                         |         |
| 18-19                         | 27/43 (63%)                           | Ref                                       |          |                                         |         |
| 20-24                         | 126/200 (63%)                         | 1.00 [0.78-1.29]                          | 0.979    |                                         |         |
| Sex                           |                                       |                                           |          |                                         |         |
| Male                          | 80/132 (61%)                          | Ref                                       |          |                                         |         |
| Female                        | 73/111 (66%)                          | 1.09 [0.90-1.32]                          | 0.405    |                                         |         |
| Education                     |                                       |                                           |          |                                         |         |
| Primary or below              | 60/96 (63%)                           | Ref                                       |          |                                         |         |
| Secondary or above            | 93/147 (63%)                          | 1.01 [0.83-1.23]                          | 0.904    |                                         |         |
| Relationship status           |                                       |                                           |          |                                         |         |
| Single                        | 46/81 (57%)                           | 1.27 [0.88-1.84]                          | 0.0013   | 0.78 [0.54-1.14]                        | 0.0284  |
| Dating                        | 86/115 (75%)                          | 1.67 [1.20-2.34]                          |          | 1.04 [0.74-1.48]                        |         |
| Married/Cohabiting            | 21/47 (45%)                           | Ref                                       |          | Ref                                     |         |
| Children                      |                                       |                                           |          |                                         |         |
| No                            | 139/204 (68%)                         | 1.89 [1.24-2.92]                          | 0.003    | 1.25 [0.80-1.97]                        | 0.318   |
| Yes                           | 14/39 (36%)                           | Ref                                       |          | Ref                                     |         |
| Living situation              |                                       |                                           |          |                                         |         |
| Lives alone                   | 30/39 (77%)                           | 2.62 [1.51-4.53]                          | 0.0024   | 1.96 [1.07-3.59]                        | 0.0119  |
| Lives with family (dependent) | 113/170 (66%)                         | 2.26 [1.33-3.85]                          |          | 1.53 [0.84-2.82]                        |         |
| Lives with child or partner   | 10/34 (29%)                           | Ref                                       |          | Ref                                     |         |
| Contraception used            |                                       |                                           |          |                                         |         |
| Condom (m/f)                  | 120/181 (66%)                         | 2.36 [1.34-4.14]                          | 0.0014   | 1.87 [1.02- 3.43]                       |         |
| ECP                           | 24/30 (80%)                           | 2.84 [1.59-5.09]                          |          | 2.27 [1.21-4.27]                        | 0.0224  |

|                 |            |     |  |     |  |
|-----------------|------------|-----|--|-----|--|
| Pills/Injection | 9/32 (28%) | Ref |  | Ref |  |
|-----------------|------------|-----|--|-----|--|

\*any variable with p-values <.2 in bivariate analysis were included in the multivariable analysis

## Why are pharmacies appealing?

Participants indicated that it was a combination of the pharmacy *facilities*, the pharmacy *personnel* themselves, and the *services* provided by the pharmacy which together made these establishments the preferred source of contraception for many young people (Table 4).

**Table 4 Reasons why pharmacies are appealing (selected excerpts from qualitative data)**

| Facility appeal                   |                                                                                                                                                                                                                                                                                                                                                                                                                                                                                                                                                                                                                                                                                                                                                                                                                                       |
|-----------------------------------|---------------------------------------------------------------------------------------------------------------------------------------------------------------------------------------------------------------------------------------------------------------------------------------------------------------------------------------------------------------------------------------------------------------------------------------------------------------------------------------------------------------------------------------------------------------------------------------------------------------------------------------------------------------------------------------------------------------------------------------------------------------------------------------------------------------------------------------|
| Convenience (locations and hours) | <p>“The chemist is near and whenever you want it [family planning] you can access it, anytime.” Female pharmacy purchaser: injection</p> <p>“The good thing with chemist is that they are many of them...when you missed a certain contraceptive at a certain chemist you can go to the next chemist because they are several of them, not like the hospital” – Female community member (FGD)</p> <p>“Yes, majority of them [young people] don’t live near health centres. Second, health centres are usually busy. And it’s not every day they [can be] attended to: there are specific days they have clinics... [The client] won’t be able to make it there...even if the treatment was free. But there is a chemist - [they] can go for similar services.” – Pharmacist</p>                                                       |
| Privacy                           | <p>“At the chemist there are not many people. I may go to Diani dispensary [a local public health facility], and there is someone who knows me and I go for family planning. I saw it would be better to go the chemist because I know that will be my secret and the attendant.” Female pharmacy purchaser: emergency contraception</p> <p>“When you go to the facility, when you go to the FP room, everyone knows that you’ve gone to get FP. For young people [especially] because no one will want to see me - I’m 18, I’m 16 and I’m already using family planning. I’m not supposed to be sexually active. The kind of population that is in those FP areas, around those FP areas it’s your mothers who are either breastfeeding, or they’re pregnant and have gone for ANC.” – Ministry of Health official, County level</p> |
| Personnel appeal                  |                                                                                                                                                                                                                                                                                                                                                                                                                                                                                                                                                                                                                                                                                                                                                                                                                                       |
| Interpersonal relationship        | <p>“the chemist is just within the neighborhood and I know the guy he is my friend outside job so it wasn’t stressful for me in fact it was really fast and easy.” – Male pharmacy purchaser: ECP and condoms</p> <p>“The person in charge is my friend, I can go to him with my problems and he would assist me, he is not that far for me to reach him with my phone - he is my neighbor I could have a problem even at night and be able to reach out to him.” -Male pharmacy purchaser: ECP</p>                                                                                                                                                                                                                                                                                                                                   |
| Seen as part of the community     | <p>“I chose it because it has been there for many years even before I was born till the time I finished school. The attendants are just normal. Many people get help from there so I saw it good to also go there.” – Female pharmacy purchaser: ECP and injection</p>                                                                                                                                                                                                                                                                                                                                                                                                                                                                                                                                                                |

|                       |                                                                                                                                                                                                                                                                                                                                                                                                                                                                                                                                                                                                                                                                                                                                                                                                                                                                                                                                                                                                                                                                                                                                                                                                                                                                                                                                     |
|-----------------------|-------------------------------------------------------------------------------------------------------------------------------------------------------------------------------------------------------------------------------------------------------------------------------------------------------------------------------------------------------------------------------------------------------------------------------------------------------------------------------------------------------------------------------------------------------------------------------------------------------------------------------------------------------------------------------------------------------------------------------------------------------------------------------------------------------------------------------------------------------------------------------------------------------------------------------------------------------------------------------------------------------------------------------------------------------------------------------------------------------------------------------------------------------------------------------------------------------------------------------------------------------------------------------------------------------------------------------------|
|                       | <p>“What I had said about the hospital, when you get there you will find the person who served you before is transferred but when you come to the chemist you will find the person that served you before.” – Female community member (FGD)</p>                                                                                                                                                                                                                                                                                                                                                                                                                                                                                                                                                                                                                                                                                                                                                                                                                                                                                                                                                                                                                                                                                     |
| Non-judgmental        | <p>“I thought at the chemist they will understand me and I would talk to them [better] than at the hospital where they will say I do not need to use those things or even talk to me harshly.” –Male pharmacy purchaser: ECP and condoms</p> <p>“At the chemist, that person wants - since it is a business – [to] just give, as compared to the hospital where when you get there you will find nurses who are arrogant or other doctors who will insult you.” Male community member (FGD)</p>                                                                                                                                                                                                                                                                                                                                                                                                                                                                                                                                                                                                                                                                                                                                                                                                                                     |
| <b>Service appeal</b> |                                                                                                                                                                                                                                                                                                                                                                                                                                                                                                                                                                                                                                                                                                                                                                                                                                                                                                                                                                                                                                                                                                                                                                                                                                                                                                                                     |
| Speed                 | <p>You know at the dispensary it is a must you meet with the doctor for more explanation. And maybe there is a service you need to pay for, the expenses are many at the dispensary unlike the chemist where everything is fast, when you get there you get what you want and leave. – Youth female, has purchased ECP and condoms</p> <p>“You get in a hospital, there are so many people queueing outside that are waiting to see a doctor. Here comes a young lady who is in a hurry. That particular person will find it more convenient to go to a chemist shop rather than going to a hospital.” – Pharmacist</p>                                                                                                                                                                                                                                                                                                                                                                                                                                                                                                                                                                                                                                                                                                             |
| Cost                  | <p>It is not easy for the government hospital. It is best, if you have money, you go to private hospitals. Now that is why you see if someone does not have money, or us the young people, we just go to the chemist because there is no cash to see a doctor for Ksh 600. At the chemist you just go direct and you are served. – Male pharmacy purchaser: ECP and condoms</p> <p>Chemists are not expensive like hospitals. In hospital you can be told it is a government hospital but you end up being asked to give out a lot of money. In [the] chemist the money you get asked is for [paying for] P2 [an emergency contraceptive], yah but in hospital you will be told to do some test because we think it is this and this.– Female pharmacy purchaser: ECP</p> <p>Free does not always mean free. Sometimes, something will be free, but by the time you get it, the process is a lot. Because for us, we don’t just offer family planning, we do [mandatory] counselling. The person who is going to a chemist is someone who has made up his or her mind. But in the public facilities, you are counselled, you are explained to, you are told the different methods, then you are given a chance to make an informed choice. So, I think that...is a barrier somehow. – Ministry of Health Official, County level</p> |

Pharmacy facilities – that is, the environments themselves – were deemed appealing because of the convenience and privacy they offered young clients. Pharmacies were located where young people lived, worked, and spent time, making them easy points of family planning access. If one pharmacy lacked what a young person was looking for, it was an easy trip to the next one. ‘Convenience’ also extended to the days and hours pharmacies were open. This made them especially important on days where health facilities were known to be busy, or evening and weekend hours when young people might need contraception.

1  
2  
3 Additionally, the relative privacy offered by pharmacies was especially important to young clients.  
4 Participants perceived pharmacies, with interactions limited to a pharmacy attendant and a client, to be  
5 far more discreet than similar services offered at public health facilities. Public health facilities had  
6 public waiting areas where young people may see someone they knew. Additionally, services in the  
7 health facility might be categorized by service type (for example, contraceptive services separated from  
8 immunization services, etc). This left young clients feeling particularly exposed should they need to walk  
9 up to a labeled 'family planning' window or step forward if a public announcement about contraceptive  
10 services was made.  
11

12  
13 The individuals behind the counter, and how they interacted with young people, were additional  
14 reasons young people preferred to obtain contraception from pharmacies. Pharmacy personnel were  
15 perceived to be established, fellow community members. Young clients appreciated seeing the same  
16 familiar faces, with less of the personnel turnover associated with public health facilities. When  
17 personnel were a similar age to young clients (a very strong preference of all young participants), many  
18 reported being able to communicate openly with pharmacy personnel and being more comfortable  
19 interacting with them.  
20

21 Pharmacy personnel were perceived to be non-judgmental compared with those working in health  
22 facilities. There was a perception that a trip to a facility would result in difficult questions, and a possible  
23 refusal to provide the desired contraceptive. Pharmacy personnel, by contrast, would treat young  
24 people well and would provide the desired contraceptive. Several participants speculated that the for-  
25 profit aspect of pharmacies could be a reason that they were treated better and not refused services.  
26

27 Finally, pharmacy contraception services themselves were appreciated for being fast and cheap.  
28 Participants routinely referenced the queueing for services and long wait times driving young people  
29 away from health facilities and into pharmacies instead. Additionally, services were perceived to be  
30 cheaper than both private health facility services as well as public health facility services. Services at  
31 private health facilities were considered out of financial reach for most young people – making a  
32 chemist a more affordable option. At public health facilities, where contraception-related services are  
33 meant to be free, participants indicated that this was often not the case in practice. Expenses related to  
34 travel, or 'tests' (for example, a pregnancy test) ordered by health care providers prior to dispensing  
35 contraception made actual costs related to public services difficult to gauge. Finally, as one government  
36 official acknowledged, even when services were free, the time and processes required could deter  
37 young people who knew what they wanted from going to facilities.  
38  
39

## 40 41 DISCUSSION

42 This mixed-method study determined pharmacies to be the most popular source of contraception for  
43 young people in a peri-urban area of Kwale County, with 59% of study participants reporting use of  
44 contraception purchased at a pharmacy at last sex – substantially higher than previously reported for  
45 Kenya as a whole. [9] Multivariable analyses indicated that young people who were still living at home  
46 with family relied more heavily on pharmacies for contraception more than their peers. That said, the  
47 strongest predictor of young people's contraception coming from pharmacies was the type of  
48 contraception they used, specifically emergency contraception. Qualitative findings demonstrated that  
49 young people valued pharmacies for their convenience; privacy; non-judgmental and personable staff;  
50 service speed; and predictable, affordable prices.  
51  
52

53 This study had several limitations. In the survey, participants were asked to specify where they or their  
54 partner had obtained the contraception used at last sex. This question is standard in studies looking to  
55 establish contraception prevalence. However, our not further ascertaining whether it was the  
56  
57

1  
2  
3 respondent or their partner *who picked up the contraception* affected our ability to distinguish  
4 differences in preferred sources between young men who obtain contraception versus young women  
5 who obtain contraception. Second, to recruit young people who had recently purchased contraception  
6 from pharmacies, we relied on assistance from five pharmacies, purposively selected (for pharmacists'  
7 willingness to cooperate and – for two pharmacies – their high volume of customers). It is possible that  
8 young purchasers patronizing different pharmacies might have had very different experiences than  
9 those captured here. Finally, our youth participants in focus group discussions may have felt  
10 uncomfortable discussing contraceptive use in a group; we attempted to mediate this by structuring  
11 discussion around vignettes of 'typical' young people. This study is strengthened by its mixed methods  
12 design and its use of multiple qualitative methods, and inclusion of both pharmacy personnel and young  
13 people to triangulate research findings on a sensitive subject.  
14  
15

16 Our findings differ substantially from an analysis of Kenya's DHS data, which found that nationwide, 13%  
17 of Kenyan women aged 15-24 reported accessing contraception at a commercial drug seller. [9] There  
18 may be several reasons for this, in addition to the four years between the Kenya DHS and our own data  
19 collection. Our study area was a peri-urban setting while the DHS analysis uses nationwide data, and  
20 over 70% of Kenya's population is rural. [16] Additionally, our study's inclusion of emergency  
21 contraception is also a likely contributor: 12% of participants in this study used emergency  
22 contraception at last sex, and Kenya's 2014 DHS did not specifically capture emergency contraception  
23 use (responses would rather have been grouped under 'other modern method') [4]. How the DHS  
24 measures 'current use' of contraception in general has been previously critiqued for not being able to  
25 capture contraceptive methods which may be used periodically, including ECP.[17] One final reason is  
26 likely our inclusion of young men, who made up 54% of the participants in our analyses. In general,  
27 there has been little study of where young men obtain contraception; however, our study's findings are  
28 in line with one analysis from a cross-sectional survey of the general British population, which found  
29 that among young men aged 16-24, 60% reported using retail sources (including pharmacies and shops)  
30 for contraception, and retail sources were the preferred source of contraception for 43% of young  
31 men.[18]  
32  
33

34 The study's qualitative findings on why pharmacies were appealing as sources of contraception for  
35 young clients were largely in line with previous research. One systematic review featuring studies mostly  
36 from high-income countries (HICs) affirms that young people appreciate pharmacies for their  
37 convenience, speed of service and ease of contraception access.[10] However, this review also reported  
38 mixed evidence (all from HICs) as to whether pharmacy services were considered 'private'[10], while our  
39 study found an almost universal appreciation of pharmacies for their privacy. This difference may be a  
40 result of different dispensing protocols and establishment layouts in pharmacies and public health  
41 facilities in high-income and LMIC settings, and speaks to the value of LMIC-specific research to improve  
42 our understanding of how contraception is delivered through pharmacies in these settings. Additional,  
43 preliminary evidence from other LMICs corroborates our findings that among young people[19], and the  
44 general population[20], pharmacies' contraception services are appreciated for the privacy offered.  
45  
46

47 All told, this mixed methods study indicates that pharmacies provide a valued, private source of  
48 contraception for many young people who may face increased scrutiny or gatekeeping in health  
49 facilities. As compared with providers in health facilities, pharmacy personnel remained non-judgmental  
50 in dispensing to young people and did not limit access to contraception (the experience of which might  
51 make a client report a less-positive interaction [21]). For young people using condoms or ECP, the  
52 reported convenience and speed of service explains a preference for pharmacies. Following unprotected  
53 sex, a young person needing ECP would understandably prefer to pay for it at a nearby pharmacy  
54 instead of traveling to a health care facility, waiting in line, and speaking with a doctor to obtain it for  
55  
56  
57

1  
2  
3 free. These findings are in line with earlier data from urban Kenya, which indicated that upwards of 96%  
4 of adult women needing emergency contraception obtained it at a pharmacy.[22] Studies from the UK  
5 and the US have noted an additional positive result of this over-the-counter access: fewer hours lapsing  
6 between unprotected sex and taking ECP as compared with prescription-only access or clinic access.[23,  
7 24]  
8

9  
10 While this study focused on pharmacies, its findings also cover perceptions around how contraception  
11 services are delivered to young people in public health facilities. Pharmacies were naturally contrasted  
12 with health facilities when participants explained young people's preferences and were perceived to be  
13 everything that health facilities were not: fast, private and non-limiting. The extras 'procedures' required  
14 to obtain contraception in health facilities – which in many cases are unnecessary [25] and have been  
15 demonstrated in other settings to limit access[26, 27] - were especially unwelcome for young people,  
16 who were uninterested in extended counselling and wary of laboratory tests. As a result, pharmacy  
17 services were deemed more 'predictable' than those obtained in health facilities (public or private).  
18 Young people could not be certain what they would encounter in health facilities, and one might travel  
19 there to find a long line, a familiar face in a queue, an unavailable service, a different doctor, a harsh  
20 word, an order for expensive tests. Pharmacies, therefore, offered a more predictable experience in a  
21 more convenient location. That, in a country where contraceptive services in public health facilities are  
22 free, pharmacy services are appreciated for their comparative low cost speaks to the perceived  
23 unpredictability of facility services.  
24

25  
26 For Kenya, pharmacies are likely to remain a preferred choice of contraception as long as barrier  
27 methods and short-acting forms of contraception are popular with young people[4]. It is therefore  
28 critical that policymakers recognize the role that private retail pharmacies play as contraception  
29 providers to the community, especially its younger members. Finding ways to link the myriad licensed  
30 pharmacies to focal points in public health facilities could strengthen a network of accessible and  
31 appealing contraception services available to young people. A similar hub-and-spoke approach is used in  
32 the implementation of Kenya's broader Community Health Strategy, where community health  
33 volunteers are embedded within the community and report back to a facility-based community health  
34 extension worker.[28] Additionally, policy dialogues between key pharmacy stakeholders and Ministry  
35 of Health could improve the capacity of pharmacy personnel to deliver quality contraceptive services;  
36 and strengthen the regulation of the type of services provided. Finally, mandating or incentivizing basic  
37 data collection in pharmacies and integrating incoming data with other health data management  
38 platforms (in Kenya, the District Health Information System 2 or DHIS2), will improve the accuracy of  
39 national and sub-national family planning prevalence measurements and, therefore, the ability to plan  
40 for and respond to local contraceptive needs. [29]  
41  
42

43  
44 It is worth noting that the survey revealed that shops were the second most popular source of  
45 contraception for young people. However, our study was not sufficiently powered to be able to analyze  
46 shops as a separate subgroup. The reliance on shops and lower-level drug dispensaries is seen  
47 elsewhere in the region: one survey in Nigeria found that among young people age 15 to 24, around half  
48 sourced their contraception from 'chemists/patent medicine shops' (a cadre of establishment below  
49 pharmacies, which does not exist in Kenya).[30] More research is needed to understand how to  
50 incorporate these more informal sources into contraception interventions. However the further lack of  
51 regulation will make this challenging: lower-level drug dispensers are only peripherally associated with  
52 the health system in many settings (in Nigeria, for example, there is no requirement for any health-  
53 related training or educational background[31]), while shops are not associated at all.  
54  
55  
56  
57  
58  
59  
60



1  
2  
3 Young people in Coastal Kenya steadily rely on pharmacies for contraception and prefer them to health  
4 facility services. It should be noted that many of the qualities most appreciated by young participants  
5 are also hallmarks of youth-friendly health services, which should be available in both health facilities  
6 and pharmacies. [32, 33] Increased collaboration between Ministry of Health and the regulatory  
7 Pharmacy and Poisons Board (as well as professional associations of pharmacy personnel) and private  
8 retail pharmacies and health facilities at County levels, can exchange operational strengths between  
9 both types of providers, and increase the overall network of quality contraception providers for young  
10 people.  
11

## 12 13 **ACKNOWLEDGEMENTS**

14  
15  
16 We appreciate the support of Jefferson Mwaisaka and Winnie Wangari. Our sincere thanks to all data  
17 collectors and participants. The manuscript represents the view of the named authors only.  
18

## 19 **FUNDING STATEMENT**

20  
21  
22 This work was partially supported by the UNDP/UNFPA/UNICEF/WHO/World Bank Special Programme  
23 of Research, Development and Research Training in Human Reproduction (HRP).  
24

## 25 **COMPETING INTERESTS**

26  
27  
28  
29 None declared  
30

## 31 **DATA AVAILABILITY STATEMENT**

32  
33  
34 The full deidentified quantitative dataset can be made available on request to corresponding author.  
35 Qualitative data cannot be shared publicly, as consent procedures for participants did not include  
36 making full interview and focus group discussion transcripts publicly available. However, transcript  
37 excerpts are available to researchers on request from the corresponding author and following approval  
38 from the University of Nairobi/Kenyatta National Hospital Ethics Committee (contact via  
39 uonknh\_erc@uonbi.ac.ke).  
40  
41

## 42 **AUTHOR CONTRIBUTORSHIP**

43  
44  
45  
46 LG conceived of the study and developed the protocol with heavy input from KW and AMH. PG, was  
47 Principal Investigator of the AMADILLO study and thereby supported LG in setting up this study's  
48 infrastructure in Kenya. LG trained and supervised data collectors, with guidance from PG. JAC and MW  
49 developed the statistical analysis plan. LG led the manuscript writing with heavy input from KW and  
50 AMH. All authors reviewed and edited drafts.  
51  
52  
53  
54  
55  
56  
57  
58  
59  
60

## REFERENCES

1. Chandra-Mouli V, McCarraher DR, Phillips SJ, Williamson NE, Hainsworth G. Contraception for adolescents in low and middle income countries: needs, barriers, and access. *Reproductive Health*. 2014;11(1):1.
2. High-Impact Practices in Family Planning (HIPs). Adolescent-friendly contraceptive services: mainstreaming adolescent-friendly elements into existing contraceptive services. . USAID; 2015.
3. MacQuarrie KLD. Unmet need for family planning among young women: Levels and trends. Rockville, MD: ICF International; 2014.
4. Kenya National Bureau of Statistics, Ministry of Health/Kenya, National AIDS Control Council/Kenya, Kenya Medical Research Institute, Population NCF, Development/Kenya. Kenya Demographic and Health Survey 2014. Rockville, MD, USA; 2015.
5. (JSI) JSI. Private Shops and Pharmacies as Providers of Family Planning. 2016.
6. Corroon M, Kebede, E, Spektor G, Speizer I. Key Role of Drug Shops and Pharmacies for Family Planning in Urban Nigeria and Kenya. *Global Health: Science and Practice*. 2016;4(4):594-609.
7. High-Impact Practices in Family Planning (HIP). Drug Shops and Pharmacies: Sources for family planning commodities and information. Washington DC: USAID; 2013.
8. Ostola J, Corroon M, Speizer I, Kebede E, Spektor G. Private sector distribution of family planning: The role of drug shops and pharmacies in urban Kenya and Nigeria. Measurement, Learning & Evaluation Project for the Urban Reproductive Health Initiative; 2015.
9. Radovich E, Dennis ML, Wong KLM, Ali M, Lynch CA, Cleland J, et al. Who Meets the Contraceptive Needs of Young Women in Sub-Saharan Africa? *Journal of Adolescent Health*. 2018;62(3):273-80.
10. Gonsalves L, Hindin MJ. Pharmacy provision of sexual and reproductive health commodities to young people: a systematic literature review and synthesis of the evidence. *Contraception*. 2017;95(4):339-63.
11. Ministry of Health/Kenya. National family planning guidelines for service providers: Updated to reflect the 2009 Medical Eligibility Criteria of the World Health Organization. Nairobi, Kenya: Division of Reproductive Health; 2010.
12. Kwale County Government. Kwale County Integrated Development Plan (2018-2022): Continuing Kwale's Transformation Together 2018.
13. Kenya Ministry of Health. Kwale county: Health at a glance. 2015.
14. Gonsalves L, Hindin MJ, Bayer A, Carcamo CP, Gichangi P, Habib N, et al. Protocol of an open, three-arm, individually randomized trial assessing the effect of delivering sexual and reproductive health information to young people (aged 13–24) in Kenya and Peru via mobile phones: adolescent/youth reproductive mobile access and delivery initiative for love and life outcomes (ARMADILLO) study stage 2. *Reproductive Health*. 2018;15(1):126.
15. Gonsalves L, Njeri WW, Schroeder M, Mwaisaka J, Gichangi P. Research and Implementation Lessons Learned From a Youth-Targeted Digital Health Randomized Controlled Trial (the ARMADILLO Study). *JMIR Mhealth Uhealth*. 2019;7(8):e13005.
16. The World Bank. Rural population (% of total population): World Bank staff estimates based on the United Nations Population Division's World Urbanization Prospects: 2018 Revision. New York, USA: World Bank Group; 2018 [Available from: <https://data.worldbank.org/indicator/SP.RUR.TOTL.ZS>].
17. Marston C, Renedo A, Nyaaba GN, Machiyama K, Tapsoba P, Cleland J. Improving the Measurement of Fertility Regulation Practices: Findings from Qualitative Research in Ghana. *Int Perspect Sexual Reprod Health*. 2017;43(3):111-9.

18. Geary RS, Tomes C, Jones KG, Glasier A, Macdowall W, Datta J, et al. Actual and preferred contraceptive sources among young people: findings from the British National Survey of Sexual Attitudes and Lifestyles. *BMJ Open*. 2016;6(9):e011966.
19. Cartwright A, Otai J, Maytan-Joneydi A, McGuire C, Sullivan E, Olumide A, et al. Access to family planning for youth: perspectives of young family planning leaders from 40 countries [version 1; peer review: 1 approved with reservations]. *Gates Open Research*. 2019;3(1513).
20. Peterson J, Brunie A, Diop I, Diop S, Stanback J, Chin-Quee D. Over the counter: The potential for easing pharmacy provision of family planning in urban Senegal [version 3; peer review: 1 approved, 2 approved with reservations]. *Gates Open Research*. 2019;2(29).
21. Hernandez JH, Mbadu MF, Garcia M, Glover A. The provision of emergency contraception in Kinshasa's private sector pharmacies: experiences of mystery clients. *Contraception*. 2018;97(1):57-61.
22. International Consortium for Emergency Contraception. Counting what counts: Tracking access to emergency contraception - Kenya. 2013.
23. Rubin AG, Gold MA, Kim Y, Schwarz EB. Use of emergency contraception by US teens: effect of access on promptness of use and satisfaction. *Journal of pediatric and adolescent gynecology*. 2011;24(5):286-90.
24. Lewington G, Marshall K. Access to emergency hormonal contraception from community pharmacies and family planning clinics. *British Journal of Clinical Pharmacology*. 2006;61(5):605-8.
25. World Health Organization. Selected practice recommendations for contraceptive use: Third edition. Geneva, Switzerland; 2016.
26. Grossman D, Ellertson C, Abuabara K, Blanchard K, Rivas FT. Barriers to contraceptive use in product labeling and practice guidelines. *Am J Public Health*. 2006;96(5):791-9.
27. Leeman L. Medical Barriers to Effective Contraception. *Obstetrics and Gynecology Clinics of North America*. 2007;34(1):19-29.
28. Oliver M, Geniets A, Winters N, Rega I, Mbae SM. What do community health workers have to say about their work, and how can this inform improved programme design? A case study with CHWs within Kenya. *Global Health Action*. 2015;8(1):27168.
29. Ndiritu M, Anyango R, Ombech E, Mwito CC; Gwer S. Family planning services in Kenya during a transition: Utilization trends across counties (Working Paper). Chapel Hill, NC, USA: MEASURE Evaluation; 2017.
30. Oye-Adeniran BA, Adewole IF, Umoh AV, Oladokun A, Gbadegesin A, Odeyemi KA, et al. Sources of Contraceptive Commodities for Users in Nigeria. *PLOS Medicine*. 2005;2(11):e306.
31. Oyeyemi AS, Ogunnowo BE, Odukoya OO. Patent Medicine Vendors in Rural Areas of Lagos Nigeria: Compliance with Regulatory Guidelines and Implications for Malaria Control. *Tropical Journal of Pharmaceutical Research*. 2014;13(1):163-9.
32. Erulkar AS, Onoka CJ, Phiri A; . What is youth-friendly? Adolescents' preferences for reproductive health services in Kenya and Zimbabwe. *African Journal of Reproductive Health*. 2005;9(3):51-8.
33. World Health Organization. Making health services adolescent friendly: developing national quality standards for adolescent friendly health services. Geneva, Switzerland: World Health Organization; 2012.

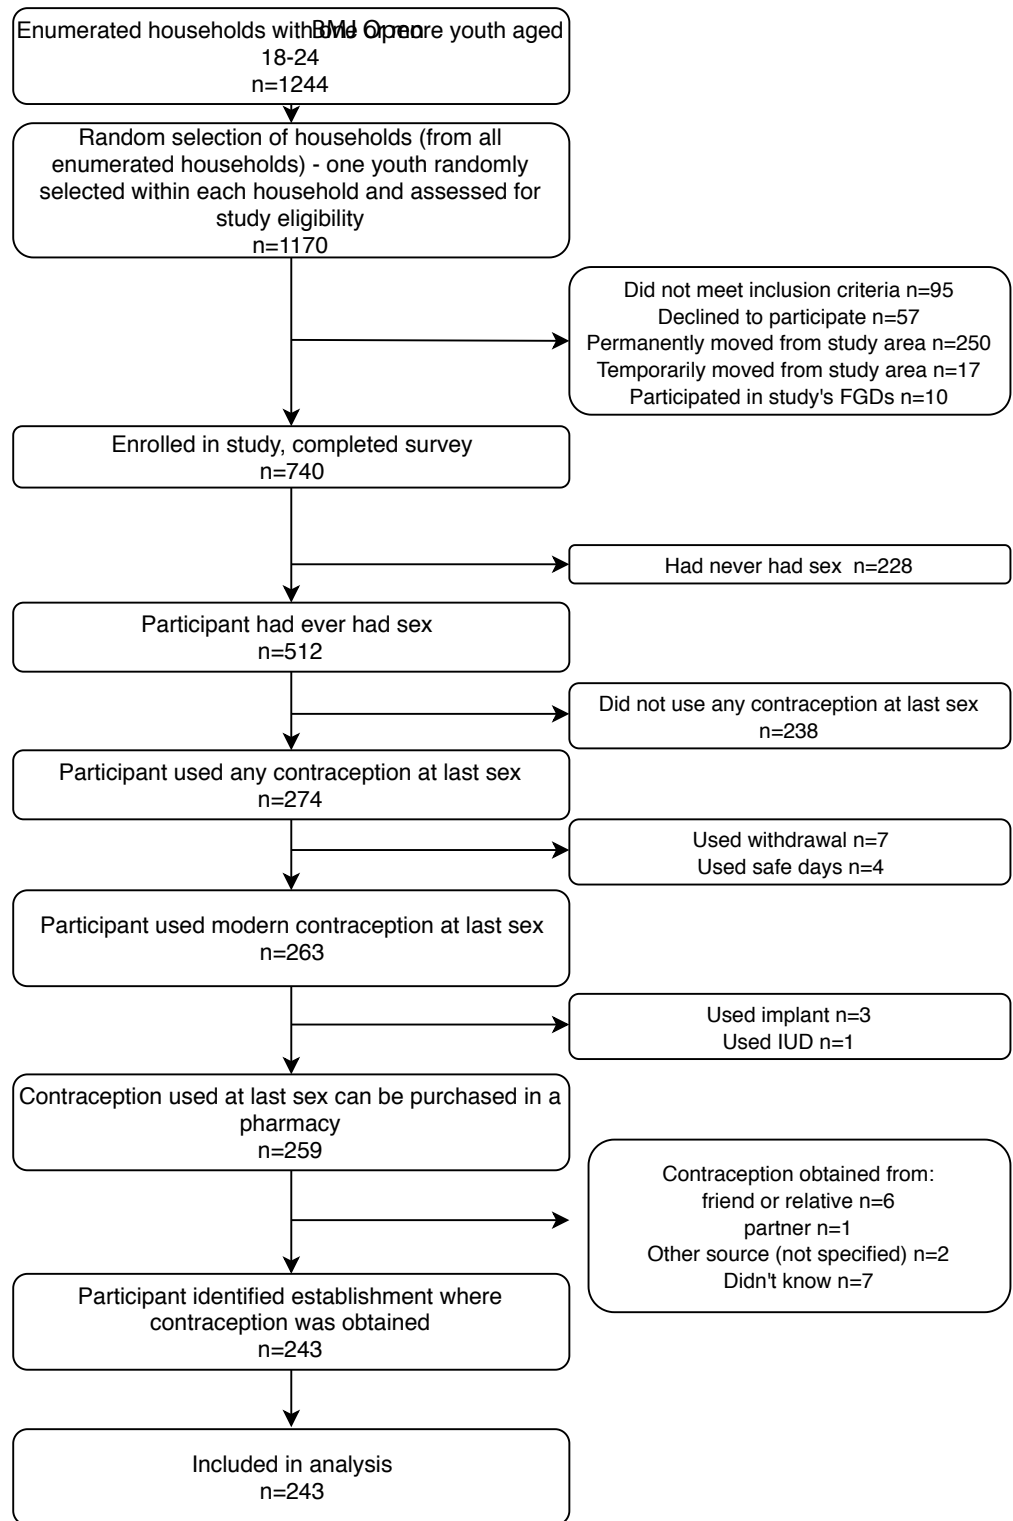

**Supplementary Table 1 Selected characteristics of young people purchasing contraception at a pharmacy, shop, or any other source**

|                                | Pharmacy (N=153) | Shop (N=29) | Any other source (N=61) |
|--------------------------------|------------------|-------------|-------------------------|
| <b>Age</b>                     |                  |             |                         |
| 18-19                          | 27 (18%)         | 6 (21%)     | 10 (16%)                |
| 20+                            | 126 (82%)        | 23 (79%)    | 51 (84%)                |
| <b>Sex</b>                     |                  |             |                         |
| Male                           | 80 (52%)         | 24 (83%)    | 28 (46%)                |
| Female                         | 73 (48%)         | 5 (17%)     | 33 (54%)                |
| <b>Education</b>               |                  |             |                         |
| Primary or below               | 60 (39%)         | 7 (24%)     | 29 (48%)                |
| Secondary or above             | 93 (61%)         | 22 (76%)    | 32 (52%)                |
| <b>Relationship status</b>     |                  |             |                         |
| Single                         | 46 (30%)         | 10 (34%)    | 25 (41%)                |
| Dating                         | 86 (56%)         | 18 (62%)    | 11 (18%)                |
| Cohabiting/Married             | 21 (14%)         | 1 (3%)      | 25 (41%)                |
| <b>Children</b>                |                  |             |                         |
| No                             | 139 (91%)        | 28 (97%)    | 37 (61%)                |
| Yes                            | 14 (9%)          | 1 (3%)      | 24 (39%)                |
| <b>Living situation</b>        |                  |             |                         |
| Lives alone                    | 30 (20%)         | 3 (10%)     | 6 (10%)                 |
| Lives with family (dependent)  | 113 (74%)        | 25 (86%)    | 32 (53%)                |
| Lives with child or partner    | 10 (7%)          | 1 (3%)      | 23 (38%)                |
| <b>Contraception purchased</b> |                  |             |                         |
| Condom                         | 120 (78%)        | 28 (97%)    | 33 (54%)                |
| ECP                            | 24 (16%)         | 1 (3%)      | 5 (8%)                  |
| Pills/Injections               | 9 (6%)           | 0 (0%)      | 23 (38%)                |

## STROBE Statement—checklist of items that should be included in reports of observational studies

|                           | Item No. | Recommendation                                                                                                                                                                             | Page No.               | Relevant text from manuscript                                                                                                                                       |
|---------------------------|----------|--------------------------------------------------------------------------------------------------------------------------------------------------------------------------------------------|------------------------|---------------------------------------------------------------------------------------------------------------------------------------------------------------------|
| <b>Title and abstract</b> | 1        | (a) Indicate the study's design with a commonly used term in the title or the abstract                                                                                                     | 1                      | Title                                                                                                                                                               |
|                           |          | (b) Provide in the abstract an informative and balanced summary of what was done and what was found                                                                                        | 1-2                    | Abstract                                                                                                                                                            |
| <b>Introduction</b>       |          |                                                                                                                                                                                            |                        |                                                                                                                                                                     |
| Background/rationale      | 2        | Explain the scientific background and rationale for the investigation being reported                                                                                                       | 3                      | Paragraph 1-4 of Introduction                                                                                                                                       |
| Objectives                | 3        | State specific objectives, including any prespecified hypotheses                                                                                                                           | 3                      | "Therefore, this mixed methods study sought to answer two questions..."                                                                                             |
| <b>Methods</b>            |          |                                                                                                                                                                                            |                        |                                                                                                                                                                     |
| Study design              | 4        | Present key elements of study design early in the paper                                                                                                                                    | 3-4                    | "This analysis was part of a broader, mixed-methods study describing how young people (aged 18-24) in Kwale County obtain contraception from pharmacies." + Table 1 |
| Setting                   | 5        | Describe the setting, locations, and relevant dates, including periods of recruitment, exposure, follow-up, and data collection                                                            | 4-5                    | Table 1 + Methods text                                                                                                                                              |
| Participants              | 6        | (a) <i>Cohort study</i> —Give the eligibility criteria, and the sources and methods of selection of participants. Describe methods of follow-up                                            | 4<br>(cross-sectional) | Table 1, "In October 2017, data collectors enumerated all households..."                                                                                            |
|                           |          | <i>Case-control study</i> —Give the eligibility criteria, and the sources and methods of case ascertainment and control selection. Give the rationale for the choice of cases and controls |                        |                                                                                                                                                                     |
|                           |          | <i>Cross-sectional study</i> —Give the eligibility criteria, and the sources and methods of selection of participants                                                                      |                        |                                                                                                                                                                     |
|                           |          | (b) <i>Cohort study</i> —For matched studies, give matching criteria and number of exposed and unexposed                                                                                   |                        | N/A                                                                                                                                                                 |
|                           |          | <i>Case-control study</i> —For matched studies, give matching criteria and the number of controls per case                                                                                 |                        |                                                                                                                                                                     |

|                              |     |                                                                                                                                                                                                                                                                                                           |     |                                                                                                                        |
|------------------------------|-----|-----------------------------------------------------------------------------------------------------------------------------------------------------------------------------------------------------------------------------------------------------------------------------------------------------------|-----|------------------------------------------------------------------------------------------------------------------------|
| Variables                    | 7   | Clearly define all outcomes, exposures, predictors, potential confounders, and effect modifiers. Give diagnostic criteria, if applicable                                                                                                                                                                  | 6   | Analysis section                                                                                                       |
| Data sources/<br>measurement | 8*  | For each variable of interest, give sources of data and details of methods of assessment (measurement). Describe comparability of assessment methods if there is more than one group                                                                                                                      | N/A | Not included beyond primary outcome (to leave space to discuss qual methods)                                           |
| Bias                         | 9   | Describe any efforts to address potential sources of bias                                                                                                                                                                                                                                                 | 5   | “Data collectors entered responses save...”                                                                            |
| Study size                   | 10  | Explain how the study size was arrived at                                                                                                                                                                                                                                                                 | 4   | “The sample size was calculated based on the ARMADILLO trial’s primary outcome...”                                     |
| Quantitative variables       | 11  | Explain how quantitative variables were handled in the analyses. If applicable, describe which groupings were chosen and why                                                                                                                                                                              | 6   | Analysis section – for primary outcome                                                                                 |
| Statistical methods          | 12  | (a) Describe all statistical methods, including those used to control for confounding                                                                                                                                                                                                                     | 6   | Analysis section                                                                                                       |
|                              |     | (b) Describe any methods used to examine subgroups and interactions                                                                                                                                                                                                                                       | N/A | Based on primary outcome, no subgroups were examined                                                                   |
|                              |     | (c) Explain how missing data were addressed                                                                                                                                                                                                                                                               | N/A | Not included (to leave space to discuss qual methods)                                                                  |
|                              |     | (d) <i>Cohort study</i> —If applicable, explain how loss to follow-up was addressed<br><i>Case-control study</i> —If applicable, explain how matching of cases and controls was addressed<br><i>Cross-sectional study</i> —If applicable, describe analytical methods taking account of sampling strategy | N/A | N/A                                                                                                                    |
|                              |     | (e) Describe any sensitivity analyses                                                                                                                                                                                                                                                                     | N/A | N/A                                                                                                                    |
| <b>Results</b>               |     |                                                                                                                                                                                                                                                                                                           |     |                                                                                                                        |
| Participants                 | 13* | (a) Report numbers of individuals at each stage of study—eg numbers potentially eligible, examined for eligibility, confirmed eligible, included in the study, completing follow-up, and analysed                                                                                                         | N/A | Not included (to leave space to discuss qual methods – reference describing this in detail is included [15] on page 4) |
|                              |     | (b) Give reasons for non-participation at each stage                                                                                                                                                                                                                                                      | N/A | Not applicable (cross-section)                                                                                         |

|                          |     |                                                                                                                                                                                                              |       |                                                                                                                                           |
|--------------------------|-----|--------------------------------------------------------------------------------------------------------------------------------------------------------------------------------------------------------------|-------|-------------------------------------------------------------------------------------------------------------------------------------------|
|                          |     | (c) Consider use of a flow diagram                                                                                                                                                                           | N/A   | Not included (to leave space to discuss qual methods – reference to open source article with this information is included [15] on page 4) |
| Descriptive data         | 14* | (a) Give characteristics of study participants (eg demographic, clinical, social) and information on exposures and potential confounders                                                                     | 6-7   | Table 2                                                                                                                                   |
|                          |     | (b) Indicate number of participants with missing data for each variable of interest                                                                                                                          | N/A   | None for primary outcome                                                                                                                  |
|                          |     | (c) <i>Cohort study</i> —Summarise follow-up time (eg, average and total amount)                                                                                                                             |       |                                                                                                                                           |
| Outcome data             | 15* | <i>Cohort study</i> —Report numbers of outcome events or summary measures over time                                                                                                                          |       |                                                                                                                                           |
|                          |     | <i>Case-control study</i> —Report numbers in each exposure category, or summary measures of exposure                                                                                                         |       |                                                                                                                                           |
|                          |     | <i>Cross-sectional study</i> —Report numbers of outcome events or summary measures                                                                                                                           | 8     | Table 3                                                                                                                                   |
| Main results             | 16  | (a) Give unadjusted estimates and, if applicable, confounder-adjusted estimates and their precision (eg, 95% confidence interval). Make clear which confounders were adjusted for and why they were included | 8-9   | Table 3                                                                                                                                   |
|                          |     | (b) Report category boundaries when continuous variables were categorized                                                                                                                                    | 8-9   | Table 3                                                                                                                                   |
|                          |     | (c) If relevant, consider translating estimates of relative risk into absolute risk for a meaningful time period                                                                                             | N/A   | N/A                                                                                                                                       |
| Other analyses           | 17  | Report other analyses done—eg analyses of subgroups and interactions, and sensitivity analyses                                                                                                               | N/A   | N/A                                                                                                                                       |
| <b>Discussion</b>        |     |                                                                                                                                                                                                              |       |                                                                                                                                           |
| Key results              | 18  | Summarise key results with reference to study objectives                                                                                                                                                     | 11-12 | Discussion paragraph 1                                                                                                                    |
| Limitations              | 19  | Discuss limitations of the study, taking into account sources of potential bias or imprecision. Discuss both direction and magnitude of any potential bias                                                   | 11-12 | Discussion paragraph 2                                                                                                                    |
| Interpretation           | 20  | Give a cautious overall interpretation of results considering objectives, limitations, multiplicity of analyses, results from similar studies, and other relevant evidence                                   | 12    | Discussion section paragraph 3-4                                                                                                          |
| Generalisability         | 21  | Discuss the generalisability (external validity) of the study results                                                                                                                                        | 12    | Discussion section paragraph 3                                                                                                            |
| <b>Other information</b> |     |                                                                                                                                                                                                              |       |                                                                                                                                           |
| Funding                  | 22  | Give the source of funding and the role of the funders for the present study and, if applicable, for the original study on which the present article is based                                                | 14    | Funding statement                                                                                                                         |



1  
2  
3  
4  
5  
6  
7  
8  
9  
10  
11  
12  
13  
14  
15  
16  
17  
18  
19  
20  
21  
22  
23  
24  
25  
26  
27  
28  
29  
30  
31  
32  
33  
34  
35  
36  
37  
38  
39  
40  
41  
42  
43  
44  
45  
46

\*Give information separately for cases and controls in case-control studies and, if applicable, for exposed and unexposed groups in cohort and cross-sectional studies.

**Note:** An Explanation and Elaboration article discusses each checklist item and gives methodological background and published examples of transparent reporting. The STROBE checklist is best used in conjunction with this article (freely available on the Web sites of PLoS Medicine at <http://www.plosmedicine.org/>, Annals of Internal Medicine at <http://www.annals.org/>, and Epidemiology at <http://www.epidem.com/>). Information on the STROBE Initiative is available at [www.strobe-statement.org](http://www.strobe-statement.org).

For peer review only

# BMJ Open

## Mixed-methods study on pharmacies as contraception providers to Kenyan young people: who uses them and why?

|                                 |                                                                                                                                                                                                                                                                                                                                                                                                                                                                                                                                                                                                                                                                                                                                                                                                                                                                                                                            |
|---------------------------------|----------------------------------------------------------------------------------------------------------------------------------------------------------------------------------------------------------------------------------------------------------------------------------------------------------------------------------------------------------------------------------------------------------------------------------------------------------------------------------------------------------------------------------------------------------------------------------------------------------------------------------------------------------------------------------------------------------------------------------------------------------------------------------------------------------------------------------------------------------------------------------------------------------------------------|
| Journal:                        | <i>BMJ Open</i>                                                                                                                                                                                                                                                                                                                                                                                                                                                                                                                                                                                                                                                                                                                                                                                                                                                                                                            |
| Manuscript ID                   | bmjopen-2019-034769.R1                                                                                                                                                                                                                                                                                                                                                                                                                                                                                                                                                                                                                                                                                                                                                                                                                                                                                                     |
| Article Type:                   | Original research                                                                                                                                                                                                                                                                                                                                                                                                                                                                                                                                                                                                                                                                                                                                                                                                                                                                                                          |
| Date Submitted by the Author:   | 24-Jan-2020                                                                                                                                                                                                                                                                                                                                                                                                                                                                                                                                                                                                                                                                                                                                                                                                                                                                                                                |
| Complete List of Authors:       | Gonsalves, Lianne; World Health Organization, Department of Sexual and Reproductive Health and Research including UNDP/UNFPA/UNICEF/WHO/World Bank Special Programme of Research, Development and Research Training in Human Reproduction (HRP); Swiss Tropical and Public Health Institute<br>Wyss, Kaspar; Swiss Tropical and Public Health Institute; University of Basel<br>Cresswell, Jenny; World Health Organization, Department of Sexual and Reproductive Health and Research including UNDP/UNFPA/UNICEF/WHO/World Bank Special Programme of Research, Development and Research Training in Human Reproduction (HRP)<br>Waithaka, Michael; International Centre for Reproductive Health Kenya Gichangi, Peter; International Centre for Reproductive Health Kenya; University of Nairobi, Department of Human Anatomy<br>Martin Hilber, Adriane; Swiss Tropical and Public Health Institute; University of Basel |
| <b>Primary Subject Heading</b>: | Sexual health                                                                                                                                                                                                                                                                                                                                                                                                                                                                                                                                                                                                                                                                                                                                                                                                                                                                                                              |
| Secondary Subject Heading:      | Respiratory medicine, Public health                                                                                                                                                                                                                                                                                                                                                                                                                                                                                                                                                                                                                                                                                                                                                                                                                                                                                        |
| Keywords:                       | REPRODUCTIVE MEDICINE, Community child health < PAEDIATRICS, PUBLIC HEALTH, QUALITATIVE RESEARCH                                                                                                                                                                                                                                                                                                                                                                                                                                                                                                                                                                                                                                                                                                                                                                                                                           |
|                                 |                                                                                                                                                                                                                                                                                                                                                                                                                                                                                                                                                                                                                                                                                                                                                                                                                                                                                                                            |

SCHOLARONE™  
Manuscripts



I, the Submitting Author has the right to grant and does grant on behalf of all authors of the Work (as defined in the below author licence), an exclusive licence and/or a non-exclusive licence for contributions from authors who are: i) UK Crown employees; ii) where BMJ has agreed a CC-BY licence shall apply, and/or iii) in accordance with the terms applicable for US Federal Government officers or employees acting as part of their official duties; on a worldwide, perpetual, irrevocable, royalty-free basis to BMJ Publishing Group Ltd ("BMJ") its licensees and where the relevant Journal is co-owned by BMJ to the co-owners of the Journal, to publish the Work in this journal and any other BMJ products and to exploit all rights, as set out in our [licence](#).

The Submitting Author accepts and understands that any supply made under these terms is made by BMJ to the Submitting Author unless you are acting as an employee on behalf of your employer or a postgraduate student of an affiliated institution which is paying any applicable article publishing charge ("APC") for Open Access articles. Where the Submitting Author wishes to make the Work available on an Open Access basis (and intends to pay the relevant APC), the terms of reuse of such Open Access shall be governed by a Creative Commons licence – details of these licences and which [Creative Commons](#) licence will apply to this Work are set out in our licence referred to above.

Other than as permitted in any relevant BMJ Author's Self Archiving Policies, I confirm this Work has not been accepted for publication elsewhere, is not being considered for publication elsewhere and does not duplicate material already published. I confirm all authors consent to publication of this Work and authorise the granting of this licence.

# Mixed-methods study on pharmacies as contraception providers to Kenyan young people: who uses them and why?

Lianne Gonsalves<sup>123</sup>, Kaspar Wyss<sup>23</sup>, Jenny A Cresswell<sup>1</sup>, Michael Waithaka<sup>4</sup>, Peter Gichangi<sup>456</sup>, Adriane Martin Hilber<sup>23</sup>

<sup>1</sup>Department of Reproductive Health and Research including UNDP/UNFPA/UNICEF/WHO/World Bank Special Programme of Research, Development and Research Training in Human Reproduction (HRP), World Health Organization, Geneva, Switzerland

<sup>2</sup>Swiss Tropical and Public Health Institute (Swiss TPH), Basel, Switzerland

<sup>3</sup>University of Basel, Basel, Switzerland

<sup>4</sup>International Centre for Reproductive Health Kenya, Mombasa, Kenya

<sup>5</sup>Department of Human Anatomy, University of Nairobi, Nairobi, Kenya

<sup>6</sup>Ghent University, Ghent, Belgium

## Corresponding author information:

Lianne Gonsalves

Address: World Health Organization, Avenue Appia 20, 1211 Geneva, Switzerland

Telephone: +41 22 791 29 70

Email address: [gonsalvesl@who.int](mailto:gonsalvesl@who.int)

Word count, excluding title page, abstract, references, figures and tables

3961

## Abstract: 272 words

### *Objectives*

This study sought to answer two questions: 1) what are the characteristics of young Kenyans aged 18-24 who use contraception obtained at pharmacies, and 2) why are pharmacies appealing sources of contraception?

### *Design and Setting*

This was a mixed-methods study in one peri-urban part of Kwale County, Kenya. Methods included: cross-sectional survey (N=740); six focus group discussions; 18 in-depth interviews; and 25 key informant interviews. Quantitative data analysis identified factors pushing young people to pharmacies for modern contraception versus other sources. Qualitative data analysis identified reasons pharmacies were perceived to be appealing to young clients.

### *Participants*

Participants were: 1) young people aged 18-24 from the study area, including a subset who had recently purchased contraception from a pharmacy; or 2) pharmacy personnel and pharmacy stakeholders.

## 36 *Results*

37 Among surveyed participants who had ever had sexual intercourse and had used modern contraception  
38 at last sexual intercourse, 59% obtained it from a pharmacy. In multivariable analysis, participants who  
39 used a condom or emergency contraception as well as those living alone were significantly more likely  
40 to get contraception from pharmacies. Pharmacies were valued for their: convenience; privacy; non-  
41 judgmental and personable staff; service speed; and predictable, affordable prices.

## 42 *Conclusions*

43 Our findings indicate a high percentage of young people in Coastal Kenya use pharmacies for  
44 contraception. Our inclusion of emergency contraception users partially explains this. Pharmacies were  
45 perceived to be everything that health facilities are not: fast, private and non-limiting. Policymakers  
46 should recognize the role of pharmacies as contraception providers and look for opportunities to link  
47 pharmacies to the public health system. This would create a network of accessible and appealing  
48 contraception services for young people.

## 50 *Strengths and limitations of this study*

- 51 • Participants were asked to specify where they or their partner had obtained the contraception  
52 used at last sex. This is a standard question for studies looking to establish contraception  
53 prevalence. Our not further ascertaining who specifically obtained the contraception affected  
54 our ability to distinguish differences in preferences of young men versus young women.
- 55 • One participant group (young people who had recently purchased contraception from a  
56 pharmacy) was recruited from five purposively selected pharmacies: this may limit the  
57 generalizability of the findings.
- 58 • This study is strengthened by its mixed methods design and inclusion of both pharmacy  
59 personnel and young people to triangulate research findings on a sensitive subject.

## 63 INTRODUCTION

64 Young people need access to contraception. However, around the world, and in low- and middle-income  
65 countries in particular, public sector contraceptive services are not meeting this need. Data from 61 low-  
66 and middle-income countries estimated that 33 million young women aged 15-24 had an unmet need  
67 for family planning.[1] Adolescents (ages 10-19 years) and youth (15-24 years) are often reluctant to  
68 access contraception at public health facilities where they may encounter a lack of privacy, biased  
69 providers, and limited contraceptive options, in addition to broader financial, legal, social, and cultural  
70 barriers. [2, 3]

71 Other parts of the health system may be able to step in to help fill this gap. In Kenya (where this study  
72 took place) and in the region, private pharmacies have become a source of modern contraception for  
73 young people [4-7]. Additional research has indicated that when contraception is introduced in  
74 pharmacies, access improved for young people.[8, 9] An analysis of 33 sub-Saharan African countries  
75 found that commercial drug sellers, including pharmacies, were the source of the most recent  
76 contraceptive method for nearly one in five young people between 15-24 years of age. [8] When also  
77 factoring in other informal and non-medical providers, including shops, these sources together serviced  
78 nearly half of women age 15-19. [8]

79 Kenya's National Family Planning Guidelines allow for the provision of several kinds of modern methods  
80 [10] of contraception to be dispensed by pharmacists or pharmaceutical technologists [11](colloquially  
81 referred to as 'chemists'). These include barrier methods like male and female condoms, as well as  
82 short-acting methods including emergency contraception (ECP), oral contraceptive pills, and injectable  
83 contraception. Injectables can be dispensed but not administered. These permissions mean that outside  
84 of health facilities, private retail pharmacies have the largest selection of modern methods available  
85 (shopkeepers can also sell condoms, per the guidelines). Private retail pharmacies must be opened and  
86 should always operate under the supervision of either a pharmacist or pharmaceutical technologist.[12]

87 Despite their demonstrable popularity among young people, there is little data on the individual-level  
88 circumstances or characteristics of young people that would drive them to pharmacies for  
89 contraception. Therefore, this mixed methods study sought to answer two questions: 1) what are the  
90 characteristics of young people who use contraception obtained at pharmacies, and 2) why are  
91 pharmacies appealing sources of contraception to young people?

## 92 METHODS

93 This analysis was part of a broader, mixed-methods study describing how young people (aged 18-24) in  
94 Kwale County obtain contraception from pharmacies. Kwale County is one of six counties in Kenya's  
95 former Coast region. The study took place in the peri-urban areas of Kwale Town and Ukunda, as well as  
96 the stretch of highway connecting the two towns. Young people between the ages of 15-24 were  
97 projected to make up 19% of the county's population by 2018.[13] In 2014, contraception prevalence in  
98 the county was 38%, lower than the national average of 53%. [14]

99 Data collection took place between October 2017 and March 2018. We used several methods (captured  
100 in Table 1) to understand the experiences of pharmacy personnel and young people themselves. This  
101 study was partly-nested in the ARMADILLO randomized controlled trial (RCT)[15], which assessed the  
102 effect of an unrelated digital health intervention on sexual and reproductive health-related outcomes  
103 for young people aged 18-24.

### 104 Table 1 Study Methods

| Method                          | N                                                   | Eligibility criteria                                                                                                                                                                                                                             | Relevant topics addressed                                                                                                                                                 |
|---------------------------------|-----------------------------------------------------|--------------------------------------------------------------------------------------------------------------------------------------------------------------------------------------------------------------------------------------------------|---------------------------------------------------------------------------------------------------------------------------------------------------------------------------|
| <b>Cross-sectional survey*</b>  | <b>740</b>                                          | <ul style="list-style-type: none"> <li>• Age 18-24</li> <li>• Literate</li> <li>• Have their own mobile phone (with them at time of recruitment) and report regular use</li> <li>• Report current use of text messaging</li> </ul>               | <ul style="list-style-type: none"> <li>• Contraception used at last sexual intercourse and source</li> <li>• Demographic and behavioral characteristics</li> </ul>        |
| <b>Focus group discussions*</b> | <b>6 (58 participants)</b>                          | <ul style="list-style-type: none"> <li>• Age 18-24</li> <li>• Community members</li> </ul>                                                                                                                                                       | <ul style="list-style-type: none"> <li>• Sources of contraception for young people</li> <li>• Characteristics of young people who use each source</li> </ul>              |
| <b>In-depth interviews</b>      | <b>18</b>                                           | <ul style="list-style-type: none"> <li>• Age 18-24</li> <li>• Recently purchased contraception at pharmacy</li> </ul>                                                                                                                            | <ul style="list-style-type: none"> <li>• Reasons for having purchased contraception from pharmacy</li> <li>• What was valued (and not valued) about experience</li> </ul> |
| <b>Key-informant interviews</b> | <b>19 (pharmacy personnel)<br/>6 (stakeholders)</b> | <ul style="list-style-type: none"> <li>• Age 18+</li> <li>• Pharmacy personnel (any role) OR</li> <li>• Pharmacy-related stakeholder (Ministry of Health; regulatory agency; professional association; non-governmental organization)</li> </ul> | <ul style="list-style-type: none"> <li>• Characteristics of young people who purchase contraception</li> <li>• What clients appreciate about experience</li> </ul>        |

105 \* Methods which were nested in the broader ARMADILLO Study, a digital health intervention RCT.  
106 Inclusion/exclusion criteria for these nested methods were determined by ARMADILLO's objectives.

107 To capture the perspectives of young people, a cross-sectional survey of young people age 18-24  
108 captured demographic information and contraceptive use patterns, including source of last  
109 contraception (these questions were one section of a broader survey conducted as part of the baseline  
110 assessment for the ARMADILLO trial). The sample size was calculated based on the ARMADILLO trial's  
111 primary outcome – the full protocol for the trial has been previously published[15], along with details of  
112 participants recruited.[16]

113 To identify participants, we obtained a map of the study area from the Kenya National Bureau of  
114 Statistics. The KNBS the country into so-called 'enumeration areas' (EAs) in preparation for the country's  
115 2019 census. EAs consist of blocks of households. Each EA had approximately 100 households. In  
116 October 2017, data collectors enumerated all age-eligible young people in every household using a  
117 random selection of 21 EAs in the study area. From this list of age-eligible youth, a random selection of  
118 households and random selection of one youth per household was generated. Data collectors visited the  
119 selected households to recruit participants (who met eligibility criteria captured in Table 1) starting in  
120 February 2018.

121 Additionally, six Focus Group Discussions were conducted with young people age 18-24, purposively  
122 recruited from the community by data collectors. Finally, we conducted in-depth interviews with 18

1  
2  
3 123 young people aged 18-24 who had recently purchased contraception from pharmacies. We purposively  
4 124 recruited these young participants in one of two ways. First, we stationed a young data collector outside  
5 125 of well-trafficked pharmacies over three evenings, who recruited young people purchasing  
6 126 contraception. Second, several pharmacists in the study area were provided with leaflets with study  
7 127 information and requested to provide these to young contraception purchasers at the end of a  
8 128 transaction.

9  
10 129 To capture the perspectives of pharmacy personnel, data collectors mapped all private, retail  
11 130 pharmacies in the study area using a digital form with an embedded geolocator. A random subset of  
12 131 pharmacies was generated using the random number generator in Excel. Pharmacies were well-  
13 132 distributed across the study area. In each selected pharmacies, data collectors were instructed to  
14 133 approach the first person behind the counter, regardless of rank or level of training, explain the study  
15 134 and ask if they would be interested in participating. Nineteen interviews in total were conducted. An  
16 135 additional six key-informant interviews were conducted with stakeholders from the regulatory  
17 136 Pharmacy and Poisons Board, Ministry of Health, professional associations, and non-governmental  
18 137 organizations. These were conducted in the individuals' offices in either Ukunda, Mombasa, or Nairobi.  
19 138 Stakeholder participants were contacted first by phone or email, the studied explained, and a  
20 139 convenient time for an in-person visit set.

## 21 140 **Data collection and management**

22 141 We obtained informed consent from all participants prior to participation. All data was collected in  
23 142 English, Swahili, or a mix of the two, depending on participants' preference. Quantitative surveys were  
24 143 close-ended and administered using webforms on a tablet. Data collectors entered responses save for  
25 144 the questions related to participants' sexual and contraceptive use history; here, to reduce potential  
26 145 discomfort and response bias, participants entered their own responses. Interviews and FGDs used  
27 146 semi-structured guides: FGD (S1), in-depth interview (S2), and key-informant interview (S3), in addition  
28 147 to relevant survey components (S4) are provided as supplementary material. We adopted an iterative  
29 148 approach to data collection, allowing question guides to be modified based on emerging themes.  
30 149 Qualitative data collection ceased upon reaching saturation. All qualitative methods used audio-  
31 150 recording (with participant permission). All study activities were conducted in a private location. Data  
32 151 collectors, speaking both English and Swahili, were recruited from the study area and specifically trained  
33 152 for this study.

34 153 This study received ethics approval from the Ethikkommission Nordwest- und Zentralschweiz (EKNZ)  
35 154 (Req-2017-00389) in Basel, Switzerland, as well as the University of Nairobi/Kenyatta National Hospital  
36 155 in Nairobi, Kenya (P274/05/2017). The ARMADILLO RCT also received ethics approval from the World  
37 156 Health Organization (Protocol WHO A65892) and is registered with the ISRCTN Registry  
38 157 (ISRCTN85156148).

## 39 158 **Patient and public involvement**

40 159 Our population (young people) were directly involved in parts of the study's design and implementation.  
41 160 Our survey data collection team consisted of young people recruited from the study area (Kwale  
42 161 County). Qualitative method data collectors were also young people recruited from both Kwale and  
43 162 Mombasa Counties. We relied on their insight and lived experience to determine how young people  
44 163 would feel most comfortable being recruited. We jointly designed our recruitment and consenting  
45 164 procedures. A dissemination meeting involving local, county, and national stakeholders (including some  
46 165 pharmacy stakeholder participants) took place in June, 2019. Several young data collectors were invited  
47 166 to attend and they provided commentary on the findings.



## 167 **Researcher characteristics and reflexivity**

168 Data collectors were young people (nearly even numbers of men and women – 24 in total) recruited  
169 from Kwale and Mombasa counties. Kwale County data collectors were familiar with the study area and  
170 recognized within their communities, which facilitated enumerating pharmacies, recruiting youth  
171 participants, and getting consent to interview pharmacy personnel. They were also less educated and  
172 less experienced than data collectors from Mombasa County. This, at times, resulted in a subordinate  
173 dynamic with some pharmacy personnel participants who were university-educated. The first author  
174 conducted all interviews with pharmacy stakeholders. She is from the United States (from a racial  
175 minority group different from the study population) and presented as an outsider (someone not from  
176 Kenya) to interviewees. Her position (leading the study and professional affiliations) resulted in  
177 respondents treating her collegially and being open to participate.

## 178 **Analysis**

179 Quantitative data was analyzed in Stata Version 14. The subject of the analyses (as described in Figure 1)  
180 were survey participants who reported using one of four contraception commodities available in  
181 pharmacies (either male or female condom, ECP, daily contraceptive pills, or injectable contraception) at  
182 last sexual intercourse *and* who reported their source. Sexual intercourse was presumed to be  
183 penetrative vaginal sex. Excluded were those participants who had not used contraception at last sexual  
184 intercourse, who had not used a contraceptive commodity (withdrawal method, calendar days), who  
185 could not remember where they had obtained their method and/or who had obtained it from a partner  
186 or friend. We developed a dichotomous ‘source of family planning’ outcome, distinguishing between  
187 ‘pharmacy’ and ‘any other source’. The latter included any public or private health facility, community-  
188 based distributors, non-governmental organizations, shops, schools, supermarkets. Following  
189 descriptive statistics, bivariate log binomial regressions assessed the association between the outcome  
190 and each behavioral/sociodemographic variable of interest. Any analysis showing a  $p < .2$  moved the  
191 variable into a multivariable Poisson regression model with robust 95% CIs.

## 192 **Figure 1 Flow Diagram of Study Participants**

193 All qualitative data was transcribed verbatim and then translated (if necessary) into English. For a sub-  
194 section of Swahili-language interviews, English-language transcripts were compared against the original  
195 Swahili-language interview audio file by another member of the research team to ensure consistency.  
196 Qualitative analysis for the broader study was guided by the five, *WHO-defined dimensions of quality  
197 health services to adolescents*: equity, accessibility, acceptability, appropriateness, and effectiveness.  
198 [17] Qualitative analysis was conducted in Atlas.ti Version 8 and relied on thematic analysis, with  
199 deductive and then inductive coding of a subset of transcripts to develop and refine a coding  
200 framework. Deductive coding was informed by the ‘accessibility’ and ‘acceptability’ dimensions and  
201 broadly captured any reference to pharmacies being ‘appealing’. Inductive coding of these data then  
202 identified specific reasons for appeal, subsequently grouping these into broad categories related to  
203 pharmacy outlet, personnel, and service appeal. These broad categories and individual reasons structure  
204 the presentation of the qualitative results.

## 205 **RESULTS**

### 206 **Survey sample characteristics**

207 A total of 1170 youth were approached for participation, of which 740 (63%) consented to participate  
208 and completed the survey. Reasons for non-participation are captured in Figure 1. As seen in Table 2, of

209 the 740 young people aged 18-24 who participated in the cross-sectional survey, 512 (69%) had ever  
 210 had sexual intercourse. Male condoms were the most popular form of contraception purchased, used by  
 211 190 of the 274 (69%) participants who used contraception at last sexual intercourse (hereafter 'at last  
 212 sex'). Of the participants indicating that they used a modern contraceptive at last sex (N=263), 154 (59%,  
 213 data not shown) had obtained it from a private, retail pharmacy (hereafter, 'pharmacy').

214 **Table 2 Baseline characteristics**

|                                                     |  | <b>All surveyed participants (N=740)</b>                                    |               |               |
|-----------------------------------------------------|--|-----------------------------------------------------------------------------|---------------|---------------|
|                                                     |  | Female                                                                      | Male          | Total         |
| Ever had sexual intercourse                         |  | 231/347                                                                     | 281/393       | 512/740 (69%) |
| Used any contraception at last sex                  |  | 126/231 (55%)                                                               | 148/281 (53%) | 274/512 (54%) |
| Used a modern contraceptive at last sex             |  | 118/231 (51%)                                                               | 145/281 (52%) | 263/512(51%)  |
| Used pharmacy-available contraception*              |  | 116/231 (50%)                                                               | 143/281 (51%) | 259/512 (51%) |
| Where contraception was obtained                    |  | (N=116)                                                                     | (N=143)       | (N=259)       |
| Pharmacy                                            |  | 63%                                                                         | 56%           | 59%           |
| Shop                                                |  | 5%                                                                          | 17%           | 11%           |
| Public dispensary or health centre                  |  | 13%                                                                         | 7%            | 10%           |
| Hospital                                            |  | 11%                                                                         | 6%            | 8%            |
| NGO, private doctor                                 |  | 3%                                                                          | 4%            | 4%            |
| Community-based distributor, school,<br>supermarket |  | 1%                                                                          | 2%            | 2%            |
| Other person**                                      |  | 1%                                                                          | 4%            | 3%            |
| Other source (not specified)/Don't know **          |  | 3%                                                                          | 3%            | 3%            |
|                                                     |  | <b>Included participants using pharmacy-available contraception (N=243)</b> |               |               |
|                                                     |  | Female (N=111)                                                              | Male (N=132)  | Total (N=243) |
| Age                                                 |  |                                                                             |               |               |
| 18-19                                               |  | 17%                                                                         | 18%           | 18%           |
| 20-24                                               |  | 83%                                                                         | 82%           | 82%           |
| Education (highest level attended)                  |  |                                                                             |               |               |
| Primary or below                                    |  | 54%                                                                         | 27%           | 40%           |
| Secondary                                           |  | 38%                                                                         | 55%           | 47%           |
| Post-secondary                                      |  | 8%                                                                          | 18%           | 14%           |
| Relationship status                                 |  |                                                                             |               |               |
| Single                                              |  | 23%                                                                         | 42%           | 33%           |
| Friends with benefits                               |  | 3%                                                                          | 8%            | 5%            |
| Dating                                              |  | 42%                                                                         | 42%           | 42%           |
| Cohabiting                                          |  | 3%                                                                          | 1%            | 2%            |
| Engaged                                             |  | 9%                                                                          | 5%            | 7%            |
| Married                                             |  | 20%                                                                         | 3%            | 11%           |
| Any children                                        |  |                                                                             |               |               |
| No                                                  |  | 74%                                                                         | 92%           | 84%           |
| Yes                                                 |  | 26%                                                                         | 8%            | 16%           |
| Living situation                                    |  |                                                                             |               |               |
| Lives alone                                         |  | 8%                                                                          | 23%           | 16%           |
| Lives with family (dependent)                       |  | 66%                                                                         | 73%           | 70%           |
| Lives with child or partner                         |  | 26%                                                                         | 4%            | 14%           |

| Contraception used***     |     |     |     |
|---------------------------|-----|-----|-----|
| Male condom               | 56% | 86% | 72% |
| Female condom             | 4%  | 2%  | 2%  |
| ECP                       | 20% | 6%  | 12% |
| Daily contraceptive pills | 5%  | 2%  | 3%  |
| Injection                 | 16% | 5%  | 10% |

215 \*these included male or female condom, emergency contraception (ECP), daily contraceptive pills, and injectable  
216 contraception

217 \*\*these were excluded from analysis

218 \*\*\*Participants could enter one contraceptive method

219  
220 Of the 243 participants who were included in bivariate and multivariable analyses, 54% were male, 61%  
221 had attended secondary school or higher, and 70% were dependents (living with parents, grandparents,  
222 or other older family members). A higher proportion of female participants than male participants were  
223 cohabiting, engaged, or married and had at least one child. Male participants had attended higher levels  
224 of schooling than female participants. Supplementary Table 1 presents selected characteristics of the  
225 243 participants disaggregated by whether they obtained contraception at a pharmacy, shop, or any  
226 other source: most shop users were male and purchased condoms.

### 227 Who accesses contraception from pharmacies?

228 Bivariate analyses (Table 3) indicated there was no evidence of an association between either age, sex,  
229 or education and a young person's contraception being from a pharmacy. There was an association  
230 between pharmacy-purchased contraception and a participant's relationship status, and whether they  
231 had children. The greatest predictors of whether a young person had visited a pharmacy were the type  
232 of contraception they purchased and with whom they lived. Following multivariate analysis (Table 3),  
233 there remained strong evidence of an association between pharmacy purchase of contraception and a  
234 young person's relationship status, living situation, as well as the type of contraception they used. Young  
235 people living alone were almost twice as likely to have sourced contraception from a pharmacy as those  
236 living with a child or partner (Adjusted PR 1.96, 95% CI [1.07-3.59]). Use of ECP remained the greatest  
237 predictor of a pharmacy purchase (Adjusted PR 2.27 as compared with pill/injection use 95% CI [1.21-  
238 4.27]).

239  
240 **Table 3 Bivariate and multivariable analysis to identify personal characteristics that may be associated**  
241 **with a young person obtaining contraception from a pharmacy (vs any other source)**

|                  | Purchased<br>contraception<br>from<br>pharmacy | Unadjusted<br>Prevalence<br>Ratio (PR) [95%<br>CI] | p-<br>value* | Adjusted<br>Prevalence Ratio<br>(PR) [95% CI] | p-value |
|------------------|------------------------------------------------|----------------------------------------------------|--------------|-----------------------------------------------|---------|
| All              | 153/243 (63%)                                  |                                                    |              |                                               |         |
| Age              |                                                |                                                    |              |                                               |         |
| 18-19            | 27/43 (63%)                                    | Ref                                                |              |                                               |         |
| 20-24            | 126/200 (63%)                                  | 1.00 [0.78-1.29]                                   | 0.979        |                                               |         |
| Sex              |                                                |                                                    |              |                                               |         |
| Male             | 80/132 (61%)                                   | Ref                                                |              |                                               |         |
| Female           | 73/111 (66%)                                   | 1.09 [0.90-1.32]                                   | 0.405        |                                               |         |
| Education        |                                                |                                                    |              |                                               |         |
| Primary or below | 60/96 (63%)                                    | Ref                                                |              |                                               |         |

|                                |               |                  |        |                   |        |
|--------------------------------|---------------|------------------|--------|-------------------|--------|
| Secondary or above             | 93/147 (63%)  | 1.01 [0.83-1.23] | 0.904  |                   |        |
| Relationship status            |               |                  |        |                   |        |
| Single                         | 46/81 (57%)   | 0.76 [0.61-0.94] | 0.0013 | 0.75 [0.61-0.93]  | 0.0284 |
| Dating/'Friends with benefits' | 86/115 (75%)  | Ref              |        | Ref               |        |
| Married/Engaged/Cohabiting     | 21/47 (45%)   | 0.60 [0.43-0.84] |        | 0.95 [0.67-1.35]  |        |
| Children                       |               |                  |        |                   |        |
| No                             | 139/204 (68%) | 1.89 [1.24-2.92] | 0.003  | 1.25 [0.80-1.97]  | 0.318  |
| Yes                            | 14/39 (36%)   | Ref              |        | Ref               |        |
| Living situation               |               |                  |        |                   |        |
| Lives alone                    | 30/39 (77%)   | 2.62 [1.51-4.53] | 0.0024 | 1.96 [1.07-3.59]  | 0.0119 |
| Lives with family (dependent)  | 113/170 (66%) | 2.26 [1.33-3.85] |        | 1.53 [0.84-2.82]  |        |
| Lives with child or partner    | 10/34 (29%)   | Ref              |        | Ref               |        |
| Contraception used             |               |                  |        |                   |        |
| Condom (m/f)                   | 120/181 (66%) | 2.36 [1.34-4.14] | 0.0014 | 1.87 [1.02- 3.43] | 0.0224 |
| ECP                            | 24/30 (80%)   | 2.84 [1.59-5.09] |        | 2.27 [1.21-4.27]  |        |
| Pills/Injection                | 9/32 (28%)    | Ref              |        | Ref               |        |

242 \*any variable with p-values <.2 in bivariate analysis were included in the multivariable analysis

### 243 Qualitative methods participant characteristics

244 Three FGDs were held with young men, and three with young women – each FGD had approximately ten  
 245 participants. Of the 18 in-depth interview participants, ten were young women and eight were young  
 246 men. Female IDI participants had most recently purchased emergency contraception (n=7), injection  
 247 (n=2), and condom (n=1). Male IDI participants had most recently purchased condom (n=6), and  
 248 emergency contraception (n=2).

249 Of the 19 key informant participants, 10 interviewed pharmacy personnel were women, 9 were men.  
 250 Participants were not probed in detail on their formal training (and therefore whether they should be  
 251 operating in their current role). That said, we could ascertain that 13 of the participants had an  
 252 appropriate amount of training for their reported tasks, and four did not (two were unclear). Self-  
 253 reported education ranged from having some secondary education to full training as a pharmacist or  
 254 pharmaceutical technologist. One participant was a nurse. Stakeholders demographics are not described  
 255 to ensure they remain unidentifiable.

### 256 Why are pharmacies appealing?

257 Participants indicated that it was a combination of the pharmacy *outlet*, the pharmacy *personnel*  
 258 themselves, and the *services* provided by the pharmacy which together made these establishments the  
 259 preferred source of contraception for many young people (Table 4).

260 **Table 4 Reasons why pharmacies are appealing (selected excerpts from qualitative data)**

|                                   |                                                                                                                                   |
|-----------------------------------|-----------------------------------------------------------------------------------------------------------------------------------|
| <b>Outlet appeal</b>              | <i>The physical pharmacy environment and its operation</i>                                                                        |
| Convenience (locations and hours) | "The chemist is near and whenever you want it [family planning] you can access it, anytime." Female pharmacy purchaser: injection |

|                               |                                                                                                                                                                                                                                                                                                                                                                                                                                                                                                                                                                                                                                                                                                                                                                                                                                       |
|-------------------------------|---------------------------------------------------------------------------------------------------------------------------------------------------------------------------------------------------------------------------------------------------------------------------------------------------------------------------------------------------------------------------------------------------------------------------------------------------------------------------------------------------------------------------------------------------------------------------------------------------------------------------------------------------------------------------------------------------------------------------------------------------------------------------------------------------------------------------------------|
|                               | <p>“The good thing with chemist is that they are many of them...when you missed a certain contraceptive at a certain chemist you can go to the next chemist because they are several of them, not like the hospital” – Female community member (FGD)</p> <p>“Yes, majority of them [young people] don’t live near health centres. Second, health centres are usually busy. And it’s not every day they [can be] attended to: there are specific days they have clinics... [The client] won’t be able to make it there...even if the treatment was free. But there is a chemist - [they] can go for similar services.” – Pharmacist</p>                                                                                                                                                                                                |
| Anonymity                     | <p>“At the chemist there are not many people. I may go to Diani dispensary [a local public health facility], and there is someone who knows me and I go for family planning. I saw it would be better to go the chemist because I know that will be my secret and the attendant.” Female pharmacy purchaser: emergency contraception</p> <p>“When you go to the facility, when you go to the FP room, everyone knows that you’ve gone to get FP. For young people [especially] because no one will want to see me - I’m 18, I’m 16 and I’m already using family planning. I’m not supposed to be sexually active. The kind of population that is in those FP areas, around those FP areas it’s your mothers who are either breastfeeding, or they’re pregnant and have gone for ANC.” – Ministry of Health official, County level</p> |
| <b>Personnel appeal</b>       | <i>The person behind the counter</i>                                                                                                                                                                                                                                                                                                                                                                                                                                                                                                                                                                                                                                                                                                                                                                                                  |
| Interpersonal relationship    | <p>“the chemist is just within the neighborhood and I know the guy he is my friend outside job so it wasn’t stressful for me in fact it was really fast and easy.” – Male pharmacy purchaser: ECP and condoms</p> <p>“The person in charge is my friend, I can go to him with my problems and he would assist me, he is not that far for me to reach him with my phone - he is my neighbor I could have a problem even at night and be able to reach out to him.” -Male pharmacy purchaser: ECP</p>                                                                                                                                                                                                                                                                                                                                   |
| Seen as part of the community | <p>“I chose it because it has been there for many years even before I was born till the time I finished school. The attendants are just normal. Many people get help from there so I saw it good to also go there.” – Female pharmacy purchaser: ECP and injection</p> <p>“What I had said about the hospital, when you get there you will find the person who served you before is transferred but when you come to the chemist you will find the person that served you before.” – Female community member (FGD)</p>                                                                                                                                                                                                                                                                                                                |
| Non-judgmental                | <p>“I thought at the chemist they will understand me and I would talk to them [better] than at the hospital where they will say I do not need to use those things or even talk to me harshly.” –Male pharmacy purchaser: ECP and condoms</p> <p>“At the chemist, that person wants - since it is a business – [to] just give, as compared to the hospital where when you get there you will find nurses who are arrogant or other doctors who will insult you.” Male community member (FGD)</p>                                                                                                                                                                                                                                                                                                                                       |
| <b>Service appeal</b>         | <i>The contraception-purchasing transaction</i>                                                                                                                                                                                                                                                                                                                                                                                                                                                                                                                                                                                                                                                                                                                                                                                       |
| Speed                         | You know at the dispensary it is a must you meet with the doctor for more explanation. And maybe there is a service you need to pay for, the expenses are                                                                                                                                                                                                                                                                                                                                                                                                                                                                                                                                                                                                                                                                             |

|             |                                                                                                                                                                                                                                                                                                                                                                                                                                                                                                                                                                                                                                                                                                                                                                                                                                                                                                                                                                                                                                                                                                                                                                                                                                                                                                                                    |
|-------------|------------------------------------------------------------------------------------------------------------------------------------------------------------------------------------------------------------------------------------------------------------------------------------------------------------------------------------------------------------------------------------------------------------------------------------------------------------------------------------------------------------------------------------------------------------------------------------------------------------------------------------------------------------------------------------------------------------------------------------------------------------------------------------------------------------------------------------------------------------------------------------------------------------------------------------------------------------------------------------------------------------------------------------------------------------------------------------------------------------------------------------------------------------------------------------------------------------------------------------------------------------------------------------------------------------------------------------|
|             | <p>many at the dispensary unlike the chemist where everything is fast, when you get there you get what you want and leave. – Youth female, has purchased ECP and condoms</p> <p>“You get in a hospital, there are so many people queueing outside that are waiting to see a doctor. Here comes a young lady who is in a hurry. That particular person will find it more convenient to go to a chemist shop rather than going to a hospital.” – Pharmacist</p>                                                                                                                                                                                                                                                                                                                                                                                                                                                                                                                                                                                                                                                                                                                                                                                                                                                                      |
| <p>Cost</p> | <p>It is not easy for the government hospital. It is best, if you have money, you go to private hospitals. Now that is why you see if someone does not have money, or us the young people, we just go to the chemist because there is no cash to see a doctor for Ksh 600. At the chemist you just go direct and you are served. – Male pharmacy purchaser: ECP and condoms</p> <p>Chemists are not expensive like hospitals. In hospital you can be told it is a government hospital but you end up being asked to give out a lot of money. In [the] chemist the money you get asked is for[paying for] P2 [an emergency contraceptive], yah but in hospital you will be told to do some test because we think it is this and this.– Female pharmacy purchaser: ECP</p> <p>Free does not always mean free. Sometimes, something will be free, but by the time you get it, the process is a lot. Because for us, we don’t just offer family planning, we do [mandatory] counselling. The person who is going to a chemist is someone who has made up his or her mind. But in the public facilities, you are counselled, you are explained to, you are told the different methods, then you are given a chance to make an informed choice. So, I think that...is a barrier somehow. – Ministry of Health Official, County level</p> |

261 Pharmacy outlets were appealing because of the convenience and anonymity they offered young clients.  
 262 Pharmacies were located where young people lived, worked, and spent time, making them easy  
 263 contraception access points. If one pharmacy lacked what a young person was looking for, it was a short  
 264 trip to the next one. ‘Convenience’ also extended to the days and hours pharmacies were open. This  
 265 made them especially important on days where health facilities were known to be busy, or evening and  
 266 weekend hours when young people might need contraception.

267 Additionally, the relative privacy offered by pharmacies was especially important to young clients.  
 268 Participants perceived pharmacies, with interactions limited to a pharmacy attendant and a client, to be  
 269 far more discreet than similar services offered at public health facilities. Public health facilities had  
 270 public waiting areas where young people may see someone they knew. Additionally, services in the  
 271 health facility might be categorized by service type (for example, contraceptive services separated from  
 272 immunization services, etc). This left young clients feeling particularly exposed should they need to walk  
 273 up to a labeled ‘family planning’ window or step forward if a public announcement about contraceptive  
 274 services was made.

275 The individuals behind the counter, and how they interacted with young people, were additional  
 276 reasons young people preferred to obtain contraception from pharmacies. Pharmacy personnel were  
 277 perceived to be established, fellow community members. Young clients appreciated seeing the same  
 278 familiar faces, with less of the personnel turnover associated with public health facilities. When  
 279 personnel were a similar age to young clients (a very strong preference of all young participants), many

1  
2  
3 280 reported being able to communicate openly with pharmacy personnel and being more comfortable  
4 281 interacting with them.  
5  
6 282 Pharmacy personnel were perceived to be non-judgmental compared with those working in health  
7 283 facilities. There was a perception that a trip to a facility would result in difficult questions, and a possible  
8 284 refusal to provide the desired contraceptive. Pharmacy personnel, by contrast, would treat young  
9 285 people well. That is, they would provide the desired contraceptive without interrogation. Several  
10 286 participants speculated that the for-profit aspect of pharmacies could be a reason that they were  
11 287 treated better and not refused services.  
12  
13 288 Finally, pharmacy contraception services themselves were appreciated for being fast and cheap.  
14 289 Participants routinely referenced the queueing for services and long wait times driving young people  
15 290 away from health facilities and into pharmacies instead. Services were also perceived to be cheaper than  
16 291 both private health facility services as well as public health facility services. Private health facilities were  
17 292 considered out of financial reach for most young people – making a chemist a more affordable option.  
18 293 However, at public health facilities, where contraception-related services are meant to be free,  
19 294 participants indicated that this was often not the case in practice. Expenses related to travel, or ‘tests’  
20 295 (for example, a pregnancy test) ordered by health care providers prior to dispensing contraception made  
21 296 real costs related to public services difficult to predict. Finally, as one government official acknowledged,  
22 297 even when services were free, the time and processes required could deter young people who knew  
23 298 what they wanted from going to facilities.  
24  
25

## 26 27 299 **DISCUSSION**

28 300 This mixed-method study determined pharmacies to be the most popular source of contraception for  
29 301 young people in a peri-urban area of Kwale County. In total, 59% of participants (and 63% female  
30 302 participants) who had ever had sex and self-reported use of a modern contraceptive at last sex had  
31 303 obtained their contraception from a pharmacy. This is higher than previously reported for Kenya as a  
32 304 whole. [8] Multivariable analyses indicated that young people who were still living at home with family  
33 305 relied more heavily on pharmacies for contraception more than their peers. That said, the strongest  
34 306 predictor of young people’s contraception coming from pharmacies was the type of contraception they  
35 307 used, specifically emergency contraception. Qualitative findings demonstrated that young people valued  
36 308 pharmacies for their convenience, anonymity, non-judgmental and personable staff, service speed, as  
37 309 well as predictable and affordable prices.  
38  
39

40 310 Together, these mixed methods indicate that pharmacies provide a valued source of contraception for  
41 311 those young people who may face increased scrutiny or gatekeeping in health facilities. For young  
42 312 people using condoms or ECP, the reported convenience and speed of service explains the strong  
43 313 preference for pharmacies. Following unprotected sex, a young person needing ECP would  
44 314 understandably prefer to pay for it at a nearby pharmacy instead of traveling to a health care facility,  
45 315 waiting in line, and negotiating with a possibly reluctant health worker to obtain it for free (assuming  
46 316 the public facility stocked ECP [18]).  
47  
48

49 317 This study had several limitations. In the survey, participants were asked to specify where they or their  
50 318 partner had obtained the contraception used at last sex. This question is standard in studies looking to  
51 319 establish contraception prevalence. However, our not further ascertaining whether it was the  
52 320 respondent or their partner *who picked up the contraception* affected our ability to distinguish  
53 321 differences in preferred sources between young men who obtain contraception versus young women  
54 322 who obtain contraception. Second, to recruit young people who had recently purchased contraception  
55 323 from pharmacies, we relied on assistance from five pharmacies, purposively selected. It is possible that  
56  
57  
58  
59  
60

1  
2  
3 324 young purchasers patronizing different pharmacies might have had different experiences than those  
4 325 captured here. Finally, our youth participants in focus group discussions may have felt uncomfortable  
5 326 discussing contraceptive use in a group; we attempted to mediate this by structuring discussion around  
6 327 vignettes of 'typical' young people. This study is strengthened by its mixed methods design and its use of  
7 328 multiple qualitative methods, and inclusion of both pharmacy personnel and young people to  
8 329 triangulate research findings on a sensitive subject.

10 330 Our quantitative findings differ substantially from an analysis of Kenya's DHS (KDHS) data, which found  
11 331 that nationwide, 13% of Kenyan women aged 15-24 currently using contraception reported obtaining it  
12 332 at a commercial drug seller. [8] There may be several reasons for this, in addition to the four years  
13 333 between the KDHS and our own data collection. Our study area was a peri-urban setting while the DHS  
14 334 analysis uses nationwide data. Over 70% of Kenya's population is rural. [19] Finally, our study's inclusion  
15 335 of emergency contraception and measuring contraception use at last sex (rather than 'current use') is  
16 336 also a likely contributor. Twelve percent of participants in this study used emergency contraception at  
17 337 last sex, and the KDHS did not specifically capture emergency contraception use [20]. The DHS's  
18 338 measures of contraception 'current use' in general has been previously critiqued for not being able to  
19 339 capture contraceptive methods which may be used periodically, including ECP.[21] Our link between ECP  
20 340 purchasers and pharmacies are in line with earlier data from urban Kenya, which indicated that upwards  
21 341 of 96% of adult women needing emergency contraception obtained it at a pharmacy.[22]

24 342 By contrast, our qualitative findings were largely in line with previous research. One systematic review  
25 343 featuring studies mostly from high-income countries (HICs) affirms that young people appreciate  
26 344 pharmacies for their convenience, speed of service and ease of contraception access.[9] However, this  
27 345 review also reported mixed evidence (all from HICs) as to whether pharmacy services were considered  
28 346 'private'[9], while our study found an almost universal appreciation of pharmacies for their  
29 347 anonymity/privacy. This difference may be a result of different dispensing protocols and establishment  
30 348 layouts in pharmacies and public health facilities in HICs vs LMICs. Preliminary evidence from other  
31 349 LMICs corroborates our findings that among young people[23], and the general population[24],  
32 350 pharmacies' contraception services are appreciated for the privacy offered.

35 351 While this study focused on pharmacies, its findings also cover perceptions around how contraception  
36 352 services are delivered to young people in public health facilities. Pharmacies were naturally contrasted  
37 353 with health facilities when participants explained young people's preferences and were perceived to be  
38 354 everything that health facilities were not: fast, private and non-limiting. The extra 'procedures' required  
39 355 to obtain contraception in health facilities – which in many cases are unnecessary [25] and have been  
40 356 demonstrated in other settings to limit access[26, 27] - were especially unwelcome for young people,  
41 357 who were uninterested in extended counselling and wary of laboratory tests. As a result, pharmacy  
42 358 services were deemed more 'predictable' than those obtained in health facilities (public or private).

45 359 For Kenya, pharmacies are likely to remain a preferred choice of contraception as long as barrier  
46 360 methods and short-acting forms of contraception are popular with young people[20]. Policymakers  
47 361 should therefore recognize their role as contraception providers, especially for a community's younger  
48 362 members. Finding ways to link the myriad licensed pharmacies to focal points in public health facilities  
49 363 could strengthen a supportive 'network' of accessible and appealing contraception services available to  
50 364 young people. A similar hub-and-spoke approach is used in the implementation of Kenya's broader  
51 365 Community Health Strategy, where community health volunteers are embedded within the community  
52 366 and report back to a facility-based community health extension worker.[28] Such a system,  
53 367 complemented by improved adolescent-friendliness of public health facilities, would also enable easier  
54 368 referral of young people to providers who can offer them more effective forms of contraception.



1  
2  
3 369 However none of this can succeed without taking needed steps to improve pharmacy regulation,  
4 370 personnel training, and the overall quality of services.[29]  
5  
6 371 Our data revealed that shops were the second most popular source of contraception for young men.  
7 372 The reliance on shops and lower-level drug dispensaries is seen elsewhere in the region: one survey in  
8 373 Nigeria found that among young people age 15 to 24, around half sourced their contraception from  
9 374 'chemists/patent medicine shops' (a cadre of establishment below pharmacies, which does not exist in  
10 375 Kenya).[30] Unfortunately, exploring shops in further detail was beyond the scope of our data collection.  
11 376 Additional research is needed to understand how to incorporate these more informal sources into  
12 377 contraception interventions. That said, integrating these source into the broader 'network' of  
13 378 contraception providers for young people will be even more challenging: lower-level drug dispensers are  
14 379 only peripherally associated with the health system in many settings, while shops are not associated at  
15 380 all.  
16  
17  
18 381 Finally, we must acknowledge those still left behind. Of participants who reported ever having sex,  
19 382 almost half of them (49%) had *not* used any modern contraception at last sex. These are young people  
20 383 who are not being reached by the current network of public and private health facilities, pharmacies,  
21 384 and even neighborhood shops. They are a reminder that improving the quality of services in these  
22 385 outlets is necessary but not sufficient to addressing young people's contraceptive needs. There is a  
23 386 continued need for multi-sectoral interventions, including comprehensive sexuality education, to  
24 387 increase demand for contraception among youth (dispelling myths, addressing taboos and stigma, and  
25 388 increasing agency) [31], address barriers to accessing it (including community norms around  
26 389 acceptability) [3], and promote uptake of highly effective forms of contraception.  
27  
28  
29 390 Young people in Coastal Kenya steadily rely on pharmacies for contraception and often prefer them to  
30 391 health facility services. Many of the pharmacy qualities most appreciated by young participants are also  
31 392 hallmarks of youth-friendly health services, which should be available in any outlet a young person  
32 393 accesses health services. [17, 32] If a young person chooses to use modern contraception, their selection  
33 394 of an outlet will be determined by several factors, including the type of contraception desired, living  
34 395 situation, and relationship status. Collaboration between health facilities and retail pharmacies at local  
35 396 levels can exchange operational strengths between these providers. Then, wherever a young person  
36 397 presents for contraceptive services, they encounter one part of a supportive network of quality  
37 398 providers.  
38

## 399 **ACKNOWLEDGEMENTS**

400 We appreciate the support of Jefferson Mwaisaka and Winnie Wangari. Our sincere thanks to all data  
401 401 collectors and participants. The manuscript represents the view of the named authors only.

## 402 **FUNDING STATEMENT**

403 This work was partially supported by the UNDP/UNFPA/UNICEF/WHO/World Bank Special Programme  
404 404 of Research, Development and Research Training in Human Reproduction (HRP).

## 405 **COMPETING INTERESTS**

406 None declared

## 407 DATA AVAILABILITY STATEMENT

408 The full deidentified quantitative dataset can be made available on request to corresponding author.  
409 Qualitative data cannot be shared publicly, as consent procedures for participants did not include  
410 making full interview and focus group discussion transcripts publicly available. However, transcript  
411 excerpts are available to researchers on request from the corresponding author and following approval  
412 from the University of Nairobi/Kenyatta National Hospital Ethics Committee (contact via  
413 uonknh\_erc@uonbi.ac.ke).

## 414 AUTHOR CONTRIBUTORSHIP

415 LG conceived of the study and developed the protocol with heavy input from KW and AMH. PG, was  
416 Principal Investigator of the AMADILLO study and thereby supported LG in setting up this study's  
417 infrastructure in Kenya. LG trained and supervised data collectors, with guidance from PG. JAC and MW  
418 developed the statistical analysis plan. LG led the manuscript writing with heavy input from KW and  
419 AMH. All authors reviewed and edited drafts.

420

## 421 REFERENCES

- 422 1. MacQuarrie KLD. Unmet need for family planning among young women: Levels and trends.  
423 Rockville, MD: ICF International; 2014.
- 424 2. Chandra-Mouli V, McCarraher DR, Phillips SJ, Williamson NE, Hainsworth G. Contraception for  
425 adolescents in low and middle income countries: needs, barriers, and access. *Reproductive Health*.  
426 2014;11(1):1.
- 427 3. High-Impact Practices in Family Planning (HIPs). Adolescent-friendly contraceptive services:  
428 mainstreaming adolescent-friendly elements into existing contraceptive services. . USAID; 2015.
- 429 4. (JSI) JSI. Private Shops and Pharmacies as Providers of Family Planning. 2016.
- 430 5. Corroon M, Kebede E, Spektor G, Speizer I. Key Role of Drug Shops and Pharmacies for Family  
431 Planning in Urban Nigeria and Kenya. *Global Health: Science and Practice*. 2016;4(4):594-609.
- 432 6. High-Impact Practices in Family Planning (HIP). Drug Shops and Pharmacies: Sources for family  
433 planning commodities and information. Washington DC: USAID; 2013.
- 434 7. Ostola J, Corroon M, Speizer I, Kebede E, Spektor G. Private sector distribution of family  
435 planning: The role of drug shops and pharmacies in urban Kenya and Nigeria. 2015.
- 436 8. Radovich E, Dennis ML, Wong KLM, Ali M, Lynch CA, Cleland J, et al. Who Meets the  
437 Contraceptive Needs of Young Women in Sub-Saharan Africa? *Journal of Adolescent Health*.  
438 2018;62(3):273-80.
- 439 9. Gonsalves L, Hindin MJ. Pharmacy provision of sexual and reproductive health commodities to  
440 young people: a systematic literature review and synthesis of the evidence. *Contraception*.  
441 2017;95(4):339-63.
- 442 10. World Health Organization. Family planning/Contraception Geneva, Switzerland: World Health  
443 Organization; 2018 [Available from: [https://www.who.int/news-room/fact-sheets/detail/family-](https://www.who.int/news-room/fact-sheets/detail/family-planning-contraception)  
444 [planning-contraception](https://www.who.int/news-room/fact-sheets/detail/family-planning-contraception)].

- 1  
2  
3 445 11. Ministry of Health/Kenya. National family planning guidelines for service providers: Updated to  
4 446 reflect the 2009 Medical Eligibility Criteria of the World Health Organization. Nairobi, Kenya: Division of  
5 447 Reproductive Health; 2010.
- 6 448 12. National Council for Law Reporting with the Authority of the Attorney-General/Kenya. Pharmacy  
7 449 and Poisons Act. Chapter 244. 1957 (revised 2012)(Cap 244).
- 8 450 13. Kwale County Government. Kwale County Integrated Development Plan (2018-2022):  
9 451 Continuing Kwale's Transformation Together 2018.
- 10 452 14. Kenya Ministry of Health. Kwale county: Health at a glance. 2015.
- 11 453 15. Gonsalves L, Hindin MJ, Bayer A, Carcamo CP, Gichangi P, Habib N, et al. Protocol of an open,  
12 454 three-arm, individually randomized trial assessing the effect of delivering sexual and reproductive health  
13 455 information to young people (aged 13–24) in Kenya and Peru via mobile phones: adolescent/youth  
14 456 reproductive mobile access and delivery initiative for love and life outcomes (ARMADILLO) study stage 2.  
15 457 Reproductive Health. 2018;15(1):126.
- 16 458 16. Gonsalves L, Njeri WW, Schroeder M, Mwaisaka J, Gichangi P. Research and Implementation  
17 459 Lessons Learned From a Youth-Targeted Digital Health Randomized Controlled Trial (the ARMADILLO  
18 460 Study). JMIR Mhealth Uhealth. 2019;7(8):e13005.
- 19 461 17. World Health Organization. Making health services adolescent friendly: developing national  
20 462 quality standards for adolescent friendly health services. Geneva, Switzerland: World Health  
21 463 Organization; 2012.
- 22 464 18. Riley C, Garfinkel D, Thanel K, Esch K, Workalemahu E, Anyanti J, et al. Getting to FP2020:  
23 465 Harnessing the private sector to increase modern contraceptive access and choice in Ethiopia, Nigeria,  
24 466 and DRC. PLOS ONE. 2018;13(2):e0192522.
- 25 467 19. The World Bank. Rural population (% of total population): World Bank staff estimates based on  
26 468 the United Nations Population Division's World Urbanization Prospects: 2018 Revision. New York, USA:  
27 469 World Bank Group; 2018 [Available from: <https://data.worldbank.org/indicator/SP.RUR.TOTL.ZS>].
- 28 470 20. Kenya National Bureau of Statistics, Ministry of Health/Kenya, National AIDS Control  
29 471 Council/Kenya, Kenya Medical Research Institute, Population NCF, Development/Kenya. Kenya  
30 472 Demographic and Health Survey 2014. Rockville, MD, USA; 2015.
- 31 473 21. Marston C, Renedo A, Nyaaba GN, Machiyama K, Tapsoba P, Cleland J. Improving the  
32 474 Measurement of Fertility Regulation Practices: Findings from Qualitative Research in Ghana. Int Perspect  
33 475 Sexual Reprod Health. 2017;43(3):111-9.
- 34 476 22. International Consortium for Emergency Contraception. Counting what counts: Tracking access  
35 477 to emergency contraception - Kenya. 2013.
- 36 478 23. Cartwright A, Otai J, Maytan-Joneydi A, McGuire C, Sullivan E, Olumide A, et al. Access to family  
37 479 planning for youth: perspectives of young family planning leaders from 40 countries [version 1; peer  
38 480 review: 1 approved with reservations]. Gates Open Research. 2019;3(1513).
- 39 481 24. Peterson J, Brunie A, Diop I, Diop S, Stanback J, Chin-Quee D. Over the counter: The potential for  
40 482 easing pharmacy provision of family planning in urban Senegal [version 3; peer review: 1 approved, 2  
41 483 approved with reservations]. Gates Open Research. 2019;2(29).
- 42 484 25. World Health Organization. Selected practice recommendations for contraceptive use: Third  
43 485 edition. Geneva, Switzerland; 2016.
- 44 486 26. Grossman D, Ellertson C, Abuabara K, Blanchard K, Rivas FT. Barriers to contraceptive use in  
45 487 product labeling and practice guidelines. Am J Public Health. 2006;96(5):791-9.
- 46 488 27. Leeman L. Medical Barriers to Effective Contraception. Obstetrics and Gynecology Clinics of  
47 489 North America. 2007;34(1):19-29.
- 48 490 28. Oliver M, Geniets A, Winters N, Rega I, Mbae SM. What do community health workers have to  
49 491 say about their work, and how can this inform improved programme design? A case study with CHWs  
50 492 within Kenya. Global Health Action. 2015;8(1):27168.

- 1  
2  
3 493 29. Gonsalves L, Wyss K, Gichangi P, Say L, Martin Hilber A. Regulating pharmacists as contraception  
4 494 providers: A qualitative study from Coastal Kenya on injectable contraception provision to youth. PLOS  
5 495 ONE. 2019;14(12):e0226133.  
6 496 30. Oye-Adeniran BA, Adewole IF, Umoh AV, Oladokun A, Gbadegesin A, Odeyemi KA, et al. Sources  
7 497 of Contraceptive Commodities for Users in Nigeria. PLOS Medicine. 2005;2(11):e306.  
8 498 31. World Health Organization. Family planning evidence brief: Reducing early and unintended  
9 499 pregnancies among adolescents. Geneva, Switzerland: World Health Organization; 2017.  
10 500 32. Erulkar AS, Onoka CJ, Phiri, A;. What is youth-friendly? Adolescents' preferences for  
11 501 reproductive health services in Kenya and Zimbabwe. African Journal of Reproductive Health.  
12 502 2005;9(3):51-8.  
13  
14  
15 503

For peer review only

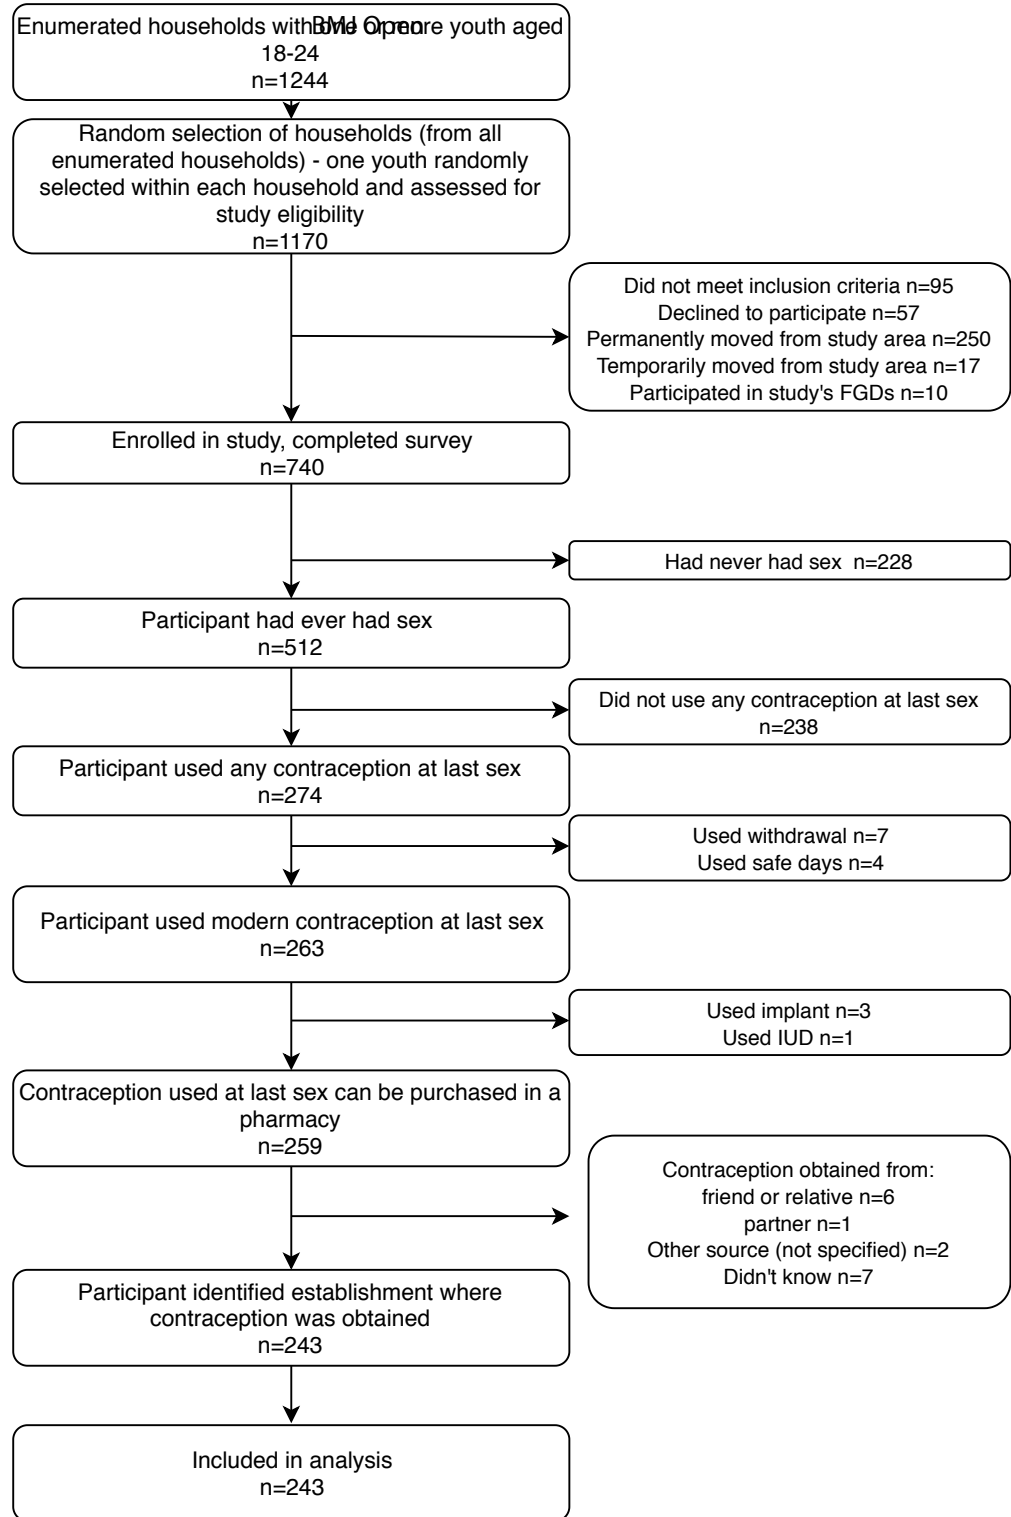

**Supplementary Table 1 Selected characteristics of young people purchasing contraception at a pharmacy, shop, or any other source**

|                                | Pharmacy (N=153) | Shop (N=29) | Any other source (N=61) |
|--------------------------------|------------------|-------------|-------------------------|
| <b>Age</b>                     |                  |             |                         |
| 18-19                          | 27 (18%)         | 6 (21%)     | 10 (16%)                |
| 20+                            | 126 (82%)        | 23 (79%)    | 51 (84%)                |
| <b>Sex</b>                     |                  |             |                         |
| Male                           | 80 (52%)         | 24 (83%)    | 28 (46%)                |
| Female                         | 73 (48%)         | 5 (17%)     | 33 (54%)                |
| <b>Education</b>               |                  |             |                         |
| Primary or below               | 60 (39%)         | 7 (24%)     | 29 (48%)                |
| Secondary or above             | 93 (61%)         | 22 (76%)    | 32 (52%)                |
| <b>Relationship status</b>     |                  |             |                         |
| Single                         | 46 (30%)         | 10 (34%)    | 25 (41%)                |
| Dating                         | 86 (56%)         | 18 (62%)    | 11 (18%)                |
| Cohabiting/Married             | 21 (14%)         | 1 (3%)      | 25 (41%)                |
| <b>Children</b>                |                  |             |                         |
| No                             | 139 (91%)        | 28 (97%)    | 37 (61%)                |
| Yes                            | 14 (9%)          | 1 (3%)      | 24 (39%)                |
| <b>Living situation</b>        |                  |             |                         |
| Lives alone                    | 30 (20%)         | 3 (10%)     | 6 (10%)                 |
| Lives with family (dependent)  | 113 (74%)        | 25 (86%)    | 32 (53%)                |
| Lives with child or partner    | 10 (7%)          | 1 (3%)      | 23 (38%)                |
| <b>Contraception purchased</b> |                  |             |                         |
| Condom                         | 120 (78%)        | 28 (97%)    | 33 (54%)                |
| ECP                            | 24 (16%)         | 1 (3%)      | 5 (8%)                  |
| Pills/Injections               | 9 (6%)           | 0 (0%)      | 23 (38%)                |

## S1. Focus Group Discussion Guide

Today we're going to discuss what young people in this community think about contraceptives and where they go when they need it.

### Warm-up

- Tell me what “contraceptive” means to you?
  - Tell me the kinds of contraceptives you've heard of

### Myths and misinformation around contraception

**Vignette:** XXX [name determined by FGD participants] is 21 and her boyfriend YYY [name determined by FGD participants] is 23. They have been dating for awhile and are thinking about using contraceptives. However, there are things about contraceptives that they have heard from friends and family members which make them uncertain.

What are some of the things which they may have heard?

Ask participants to write down on sticky notes at least three things that XX and YY may have heard which would make them nervous. NoteTaker and Facilitator 3 will post these on the board, grouping together the similar ones. After they are all posted, moderator can ask:

- *[read out the reasons listed on the board]:* Are there any additional reasons XX and YY may feel uncertain that you can think of?
- *[also probe on certain reasons that are vague or broad]*

### Where young people get contraceptives

- Tell me about all the places in \_\_\_\_\_ (study site town), where a young person can get contraceptives? *(Facilitator 3 writes out a list)*
- Describe all the different kinds of young people you could find in your community. *(keep this short)*

For each listed contraception source:

- Describe the kind of young person who would go to a \_\_\_\_\_ if he/she needed contraceptives? *(Draw stick figure under each source name, probe on and label with identifiers: gender, marital status, etc)*  
*Facilitator 3 stops drawing after question above*
- When would a young person choose to go to a \_\_\_\_\_ to get contraceptives?
  - [Note]: what kind of contraceptives are they getting
- Why would this young person choose to go to a \_\_\_\_\_ to get contraceptives over another source?

- 1  
2  
3           ○ [Probe] What are the best qualities about \_\_\_\_\_ as a resource for contraceptives?  
4       • What might other young people *dislike* about \_\_\_\_\_ as a resource for contraceptives?  
5  
6

7       **Qualities of ideal FP-dispensing in *non-service sources***

- 8  
9       • What are the most important qualities a chemist or a shop needs to have for a young person to  
10       be comfortable obtaining contraceptives? [*Probe on person working vs the shop itself*]  
11       • What could be some reasons why young people would not be comfortable going to chemists or  
12       shops?  
13           ○ What could be done to increase the comfort of young people who might not be  
14           comfortable going to chemists or shops?  
15       • What **other** information and services would a young person needing contraceptives from a  
16       chemist or a shop also need?  
17           ○ [*be sure to probe on information AND services separately*]  
18       • What could be done to make sure that young people can get the extra information and services  
19       (*that group mentioned in previous question*) that they need from chemists and shops without  
20       being uncomfortable and without sacrificing their privacy and speed (*or whatever is mentioned*  
21       *as an important quality*).  
22  
23  
24  
25  
26  
27  
28  
29

30       *Close and thank people for their time*  
31  
32  
33  
34  
35  
36  
37  
38  
39  
40  
41  
42  
43  
44  
45  
46  
47  
48  
49  
50  
51  
52  
53  
54  
55  
56  
57  
58  
59  
60



## S2. In-Depth Interview guide for young contraception purchasers

### Warm-up

- Tell me about what life is like for young people (people your age) in this community.
- What are some of the challenges that young people face?

### As you told us earlier, you recently purchased family planning from a chemist shop nearby. I want to ask you about this experience

- Tell me about what your experience was like when purchasing FP from the chemist – how did it go, from beginning to end? [*looking for information on environment, interaction with chemists, how they were treated*]
  - How did you feel at each step?
  - What was the most difficult part of the experience?
  - What was the easiest part of the experience?
- Describe your interaction with the chemist attendant [*probe on: how were you treated? Did they give you advice*]
  - How did he/she react to your request
- Tell me about the information you were given by the chemist [*probe on: counselling, life advice, side effects, referrals other FP*]
- Tell me about what else was going on in the chemist shop while you were purchasing FP.
- How did you feel after you left the shop?
- Given the experience you've just described to me, how did that compare with what you *thought* would happen when you first walked in the chemist shop? \*

### Thinking about the time that you purchased family planning at the chemist, help me understand how you made that decision:

- What situation made you decide that you needed family planning? [*Probe on whether others were involved in this decision*]
- How did you decide what kind of family planning you wanted?
- Why did you decide to go to a chemist for family planning instead of other places?
  - Why did you select that particular chemist?
- How did this experience compare with other times you have bought family planning?

### As a young person who has purchased FP from a chemist, I am interested to hear your ideas for how chemist shops could be improved for young people:

- Were there any parts of your experience that you liked?
- Based on your experience, was there anything you would've liked to happen that didn't?
  - *Probe (if necessary):* Based on these, is there any part of the experience that you want changed?
- If you worked at the chemist, what would you do to make young clients buying family planning feel comfortable?
- If you worked at the chemist, how could you improve the shop to be more friendly to young people needing family planning?

- 1
  - 2
  - 3
  - 4
  - 5
  - 6
  - 7
  - 8
  - 9
  - 10
  - 11
  - 12
  - 13
  - 14
  - 15
  - 16
  - 17
  - 18
  - 19
  - 20
  - 21
  - 22
  - 23
  - 24
  - 25
  - 26
  - 27
  - 28
  - 29
  - 30
  - 31
  - 32
  - 33
  - 34
  - 35
  - 36
  - 37
  - 38
  - 39
  - 40
  - 41
  - 42
  - 43
  - 44
  - 45
  - 46
  - 47
  - 48
  - 49
  - 50
  - 51
  - 52
  - 53
  - 54
  - 55
  - 56
  - 57
  - 58
  - 59
  - 60
- What else do young people need to feel comfortable getting FP from chemists?

For peer review only

### S3. Key Informant Interview guide (for a person working in a pharmacy)

#### Group 1 (Background – Personal)

- Tell me about yourself and how you came to work in the chemist?
  - Probe if they are from the area
  - What is their current title?
- Tell me about the roles and responsibilities of your job - describe a typical day of work
- What are the things that you enjoy about your job?
- What are the things you do not enjoy about your job?

#### Group 2 (Background – Shop)

- Tell me about who else works at this chemist
  - Probe: what are their roles and how are they different from yours?
- Describe how the chemist shop is organized?
- When are you busiest?
  - Probe: opening hours

#### Group 3 (Family planning)

- Tell me about the family planning in this chemist shop
  - Probe: what kinds are available, most popular, price
- Tell me about the kinds of people from the community who buy these family planning
  - Probe: Describe them, what they are looking for
- Why are chemist shops like yours important in providing family planning to the community?
  - Probe: How is this job different from health facilities that also have family planning?
- If a young person comes in asking for family planning, what are some of things you look at that help you decide what to recommend?
- What are the rules for dispensing family planning?
  - Probe: are there any exceptions to these rules?
- Describe the kinds training (either from your boss or from previous training) you received about family planning?

#### Group 4 (Feelings about selling family planning to young people)

- Think about the last time that young person (18-24) came to this chemist for some kind of family planning. Can you describe the interaction, from beginning to end?
  - Probe: what happens, what would they say, what would you say, what do you give them?
- How do young customers feel coming to ask for family planning (Probe: what do they say)
- What could chemist shops like this one do to improve the comfort of young people in the community who need family planning?
- When a young customer comes in asking for family planning, how do you feel?

- 1  
2  
3           ○ Are things you would like to tell them?  
4  
5       • If you had the power, what would you do to improve the confidence of chemists to provide  
6       family planning to young people?  
7  
8  
9  
10  
11  
12  
13  
14  
15  
16  
17  
18  
19  
20  
21  
22  
23  
24  
25  
26  
27  
28  
29  
30  
31  
32  
33  
34  
35  
36  
37  
38  
39  
40  
41  
42  
43  
44  
45  
46  
47  
48  
49  
50  
51  
52  
53  
54  
55  
56  
57  
58  
59  
60
- Are things you would like to tell them?
  - If you had the power, what would you do to improve the confidence of chemists to provide family planning to young people?

For peer review only

## S4. Tool 2 – Survey Instrument (Excerpt)

**SOCIO-DEMOGRAPHIC INFORMATION. First we're going to talk about who you are.**

1. What is your sex? Mark ONLY ONE.

- 0 Male
- 1 Female

2. What is your birthdate?

Day |\_\_|\_\_|    Month |\_\_|\_\_|    Year |\_\_|\_\_|\_\_|\_\_|

3. What is the highest level of school you attended? Mark ONLY ONE.

- 0 I've never gone to school
- 1 Primary school
- 2 Secondary school
- 3 Post-secondary education – **GO TO 5**

4. What is the highest grade you completed at that level?

|\_\_|\_\_| grade/form/level – **GO TO 6**

5. What type of post-secondary education did you attend/are you attending? Mark ONLY ONE.

- 1 Technical post-secondary education
- 2 University education

6. Who do you currently live with? Mark ALL possible options.

- 0 I live alone
- 1 Father/stepfather
- 2 Mother/stepmother
- 3 Siblings
- 4 Grandparents
- 5 Other relatives

- 1  
2  
3 6 Husband or wife – **NOTE: Be sure to ask whether husband/wife or cohabiting partner.**  
4 7 Cohabiting partner  
5 8 In-laws  
6 9 Children  
7 10 Friends  
8  
9

10  
11 7. What is your current relationship status?

- 12 0 Single  
13 1 Friends with benefits  
14 2 Dating  
15 3 Cohabiting  
16 4 Engaged  
17 5 Married  
18 6 Other (specify)  
19  
20

21 8. How many children do you have?

- 22 0 I have no children – **GO TO 10**

23  
24  
25  
26  
27 |\_\_|\_\_| child/children  
28  
29

30 9. How old were you when you had your first child?

31  
32  
33 |\_\_|\_\_| years old  
34  
35

36 ...

37 [SURVEY CONTINUES]  
38

39 **ARMADILLO-RELATED BEHAVIORS. Now we're going to talk about sexual activity in order to gain a**  
40 **better understanding of some important life issues. Let me assure you again that your answers are**  
41 **completely confidential and will not be told to anyone.**  
42  
43  
44  
45

46 29. How old were you when you had sexual intercourse for the very first time?

47  
48 |\_\_|\_\_| years old  
49  
50

- 51 0 I have never had sexual intercourse – **GO TO 46**  
52

53 30. Have you ever used any method to prevent pregnancy? By use, I mean that either you, yourself,  
54 have used the method or that a partner of yours used the method when having sex with you.  
55  
56  
57  
58  
59

1  
2  
3 YES .....1  
4 NO.....0  
5  
6 DON'T KNOW.....8  
7 REFUSED .....9  
8

9  
10 31. When was the last time you had sex?

11 |\_\_|\_\_| days ago

12 |\_\_|\_\_| weeks ago

13  
14  
15  
16  
17 |\_\_|\_\_| months ago

18  
19  
20  
21 |\_\_|\_\_| years ago  
22  
23  
24  
25  
26  
27

28  
29 32. The last time you had sex, what was your relationship to this person with whom you had sexual  
30 intercourse?  
31

- 32 1 Boyfriend not living with respondent  
33 2 Girlfriend not living with respondent  
34 3 Male cohabiting partner  
35 4 Female cohabiting partner  
36 5 Husband  
37 6 Wife  
38 7 Male casual acquaintance  
39 8 Female casual acquaintance  
40 9 Male sex worker  
41 10 Female sex worker  
42 11 Female client (respondent is male sex worker)  
43 12 Male client (respondent is female sex worker)  
44 13 Male relative  
45 14 Female relative  
46  
47  
48  
49

50 33. The last time you had sex, did you or your partner use a contraceptive method?  
51

- 52 0 No – **GO TO 45**  
53 1 Yes  
54  
55

56 34. The last time you had sex, which contraceptive method did you or your partner use?  
57  
58  
59  
60

- 1 Male condom
- 2 Female condom
- 3 Birth control pill
- 4 Injectable
- 5 Implant
- 6 Intrauterine device (IUD)
- 7 Emergency contraception (the morning after pill)
- 8 Female sterilization
- 9 Male sterilization (vasectomy)
- a. Withdrawal – **GO TO 44**
- 10 Rhythm method – **GO TO 44**

35. The last time you had sex, where did you or your partner obtain the contraceptive method you used?

- 1 A pharmacy or chemist
- 2 County Hospital
- 3 Health centres
- 4 A NGO
- 5 A private doctor or clinic
- 6 A shop/market
- 7 A community-based distributor
- 8 A peer educator
- 9 A traditional healer – **GO TO 44**
- 10 A friend or relative – **GO TO 44**
- 11 A partner – **GO TO 44**
- 12 Other – **GO TO 44**

36. When you obtained your [MOST RECENT CONTRACEPTIVE METHOD], were you told by the provider about side effects of problems you might have with a method to delay or avoid getting pregnant?

- 1 Yes
- 2 No

37. Were you told what to do if you experienced side effects or problems?

- 1 Yes
- 2 No

38. At that time, were you told by the family planning provider about methods of family planning other than [MOST RECENT CONTRACEPTIVE METHOD] that you could use?

- 1 Yes
- 2 No

39. During that visit did you obtain the method you wanted to delay or avoid getting pregnant?

- 1 Yes – **GO TO 42**



2 No

40. Why didn't you obtain the method you wanted?

- 1 Method out of stock that day
- 2 Method not available at all
- 3 Provider not trained to provide the method
- 4 Provider recommended a different method
- 5 Not eligible for method
- 6 Decided not to adopt a method
- 7 Too costly
- 8 Other

41. During that visit who made the final decision about what method you got?

- 1 You alone
- 2 Provider
- 3 Partner
- 4 You and provider
- 5 You and partner
- 6 Other

42. Would you return to this provider?

- 1 Yes
- 2 No

43. Would you refer your relative or friend to this provider/facility?

- 1 Yes
- 2 No

44. How important were each of the following characteristics to you in deciding which birth control method to use? (*read item, asking*) Would you say: not at all important, slightly important, quite important or extremely important to you in choosing a method?

|                                                 | Not at all important | Slightly important | Quite important | Extremely important |
|-------------------------------------------------|----------------------|--------------------|-----------------|---------------------|
| A. It is very effective at preventing pregnancy |                      |                    |                 |                     |
| B. It has a low cost.                           |                      |                    |                 |                     |

1  
2  
3  
4  
5  
6  
7  
8  
9  
10  
11  
12  
13  
14  
15  
16  
17  
18  
19  
20  
21  
22  
23  
24  
25  
26  
27  
28  
29  
30  
31  
32  
33  
34  
35  
36  
37  
38  
39  
40  
41  
42  
43  
44  
45  
46  
47  
48  
49  
50  
51  
52  
53  
54  
55  
56  
57  
58  
59  
60

|                                                                   |  |  |  |  |
|-------------------------------------------------------------------|--|--|--|--|
| C. It is easy to use.                                             |  |  |  |  |
| D. It doesn't contain hormones.                                   |  |  |  |  |
| E. It is acceptable to my partner<br>F. It doesn't interrupt sex. |  |  |  |  |
| G. It is effective at preventing HIV or STIs.                     |  |  |  |  |

For peer review only

## Standards for Reporting Qualitative Research (SRQR)\*

<http://www.equator-network.org/reporting-guidelines/srqr/>

Page/line no(s).

### Title and abstract

|                                                                                                                                                                                                                                                              |                                                          |
|--------------------------------------------------------------------------------------------------------------------------------------------------------------------------------------------------------------------------------------------------------------|----------------------------------------------------------|
| <p><b>Title</b> - Concise description of the nature and topic of the study Identifying the study as qualitative or indicating the approach (e.g., ethnography, grounded theory) or data collection methods (e.g., interview, focus group) is recommended</p> | <p>Page 1/Line 1&amp;2 (identified as mixed methods)</p> |
| <p><b>Abstract</b> - Summary of key elements of the study using the abstract format of the intended publication; typically includes background, purpose, methods, results, and conclusions</p>                                                               | <p>Page 1-2</p>                                          |

### Introduction

|                                                                                                                                                                     |                                 |
|---------------------------------------------------------------------------------------------------------------------------------------------------------------------|---------------------------------|
| <p><b>Problem formulation</b> - Description and significance of the problem/phenomenon studied; review of relevant theory and empirical work; problem statement</p> | <p>Page 3/Line 67-73, 87-89</p> |
| <p><b>Purpose or research question</b> - Purpose of the study and specific objectives or questions</p>                                                              | <p>Page 3/Line 89-91</p>        |

### Methods

|                                                                                                                                                                                                                                                                                                                                                                                                             |                                           |
|-------------------------------------------------------------------------------------------------------------------------------------------------------------------------------------------------------------------------------------------------------------------------------------------------------------------------------------------------------------------------------------------------------------|-------------------------------------------|
| <p><b>Qualitative approach and research paradigm</b> - Qualitative approach (e.g., ethnography, grounded theory, case study, phenomenology, narrative research) and guiding theory if appropriate; identifying the research paradigm (e.g., postpositivist, constructivist/ interpretivist) is also recommended; rationale**</p>                                                                            | <p>(see response to reviewers Page 3)</p> |
| <p><b>Researcher characteristics and reflexivity</b> - Researchers' characteristics that may influence the research, including personal attributes, qualifications/experience, relationship with participants, assumptions, and/or presuppositions; potential or actual interaction between researchers' characteristics and the research questions, approach, methods, results, and/or transferability</p> | <p>Page 5/Line 166-175</p>                |
| <p><b>Context</b> - Setting/site and salient contextual factors; rationale**</p>                                                                                                                                                                                                                                                                                                                            | <p>Page 3/Line 93-98</p>                  |
| <p><b>Sampling strategy</b> - How and why research participants, documents, or events were selected; criteria for deciding when no further sampling was necessary (e.g., sampling saturation); rationale**</p>                                                                                                                                                                                              | <p>Page 4/113-147</p>                     |
| <p><b>Ethical issues pertaining to human subjects</b> - Documentation of approval by an appropriate ethics review board and participant consent, or explanation for lack thereof; other confidentiality and data security issues</p>                                                                                                                                                                        | <p>Page 5/Line151-155</p>                 |
| <p><b>Data collection methods</b> - Types of data collected; details of data collection procedures including (as appropriate) start and stop dates of data collection and analysis, iterative process, triangulation of sources/methods, and modification of procedures in response to evolving study findings; rationale**</p>                                                                             | <p>Page5/Line141-151</p>                  |

|                       |                                                                                                                                                                                                                                                       |                                                    |
|-----------------------|-------------------------------------------------------------------------------------------------------------------------------------------------------------------------------------------------------------------------------------------------------|----------------------------------------------------|
| 1<br>2<br>3<br>4<br>5 | <b>Data collection instruments and technologies</b> - Description of instruments (e.g., interview guides, questionnaires) and devices (e.g., audio recorders) used for data collection; if/how the instrument(s) changed over the course of the study | Page 5/Line 141-151 ( and Supplementary materials) |
| 6<br>7<br>8           | <b>Units of study</b> - Number and relevant characteristics of participants, documents, or events included in the study; level of participation (could be reported in results)                                                                        | Page 4/Table 1<br>Page 9/Line 243-254              |
| 9<br>10<br>11<br>12   | <b>Data processing</b> - Methods for processing data prior to and during analysis, including transcription, data entry, data management and security, verification of data integrity, data coding, and anonymization/de-identification of excerpts    | Page 6/Line192-194                                 |
| 13<br>14<br>15<br>16  | <b>Data analysis</b> - Process by which inferences, themes, etc., were identified and developed, including the researchers involved in data analysis; usually references a specific paradigm or approach; rationale**                                 | Page6/Line194-203                                  |
| 17<br>18<br>19<br>20  | <b>Techniques to enhance trustworthiness</b> - Techniques to enhance trustworthiness and credibility of data analysis (e.g., member checking, audit trail, triangulation); rationale**                                                                | Page 6/Line193-194                                 |

## Results/findings

|                      |                                                                                                                                                                                                   |                                        |
|----------------------|---------------------------------------------------------------------------------------------------------------------------------------------------------------------------------------------------|----------------------------------------|
| 23<br>24<br>25<br>26 | <b>Synthesis and interpretation</b> - Main findings (e.g., interpretations, inferences, and themes); might include development of a theory or model, or integration with prior research or theory | Page 9/From Line 255 to end of section |
| 27<br>28<br>29       | <b>Links to empirical data</b> - Evidence (e.g., quotes, field notes, text excerpts, photographs) to substantiate analytic findings                                                               | Page 9/Table 4                         |

## Discussion

|                                        |                                                                                                                                                                                                                                                                                                                                                                                                             |                                   |
|----------------------------------------|-------------------------------------------------------------------------------------------------------------------------------------------------------------------------------------------------------------------------------------------------------------------------------------------------------------------------------------------------------------------------------------------------------------|-----------------------------------|
| 32<br>33<br>34<br>35<br>36<br>37<br>38 | <b>Integration with prior work, implications, transferability, and contribution(s) to the field</b> - Short summary of main findings; explanation of how findings and conclusions connect to, support, elaborate on, or challenge conclusions of earlier scholarship; discussion of scope of application/generalizability; identification of unique contribution(s) to scholarship in a discipline or field | Page 12/Entire discussion section |
| 39<br>40                               | <b>Limitations</b> - Trustworthiness and limitations of findings                                                                                                                                                                                                                                                                                                                                            | Page12/Line316-328                |

## Other

|                |                                                                                                                                               |                     |
|----------------|-----------------------------------------------------------------------------------------------------------------------------------------------|---------------------|
| 43<br>44<br>45 | <b>Conflicts of interest</b> - Potential sources of influence or perceived influence on study conduct and conclusions; how these were managed | Page 14/Line 405    |
| 46<br>47<br>48 | <b>Funding</b> - Sources of funding and other support; role of funders in data collection, interpretation, and reporting                      | Page 14/Line402-403 |

\*The authors created the SRQR by searching the literature to identify guidelines, reporting standards, and critical appraisal criteria for qualitative research; reviewing the reference lists of retrieved sources; and contacting experts to gain feedback. The SRQR aims to improve the transparency of all aspects of qualitative research by providing clear standards for reporting qualitative research.

1  
2  
3  
4  
5  
6  
7  
8  
9  
10  
11  
12  
13  
14  
15  
16  
17  
18  
19  
20  
21  
22  
23  
24  
25  
26  
27  
28  
29  
30  
31  
32  
33  
34  
35  
36  
37  
38  
39  
40  
41  
42  
43  
44  
45  
46  
47  
48  
49  
50  
51  
52  
53  
54  
55  
56  
57  
58  
59  
60

\*\*The rationale should briefly discuss the justification for choosing that theory, approach, method, or technique rather than other options available, the assumptions and limitations implicit in those choices, and how those choices influence study conclusions and transferability. As appropriate, the rationale for several items might be discussed together.

**Reference:**

O'Brien BC, Harris IB, Beckman TJ, Reed DA, Cook DA. **Standards for reporting qualitative research: a synthesis of recommendations.** *Academic Medicine*, Vol. 89, No. 9 / Sept 2014  
DOI: 10.1097/ACM.0000000000000388

For peer review only

## STROBE Statement—checklist of items that should be included in reports of observational studies

|                           | Item No. | Recommendation                                                                                                                                                                             | Page No.               | Relevant text from manuscript                                                                                                                                       |
|---------------------------|----------|--------------------------------------------------------------------------------------------------------------------------------------------------------------------------------------------|------------------------|---------------------------------------------------------------------------------------------------------------------------------------------------------------------|
| <b>Title and abstract</b> | 1        | (a) Indicate the study's design with a commonly used term in the title or the abstract                                                                                                     | 1                      | Title                                                                                                                                                               |
|                           |          | (b) Provide in the abstract an informative and balanced summary of what was done and what was found                                                                                        | 1-2                    | Abstract                                                                                                                                                            |
| <b>Introduction</b>       |          |                                                                                                                                                                                            |                        |                                                                                                                                                                     |
| Background/rationale      | 2        | Explain the scientific background and rationale for the investigation being reported                                                                                                       | 3                      | Paragraph 1-4 of Introduction                                                                                                                                       |
| Objectives                | 3        | State specific objectives, including any prespecified hypotheses                                                                                                                           | 3                      | "Therefore, this mixed methods study sought to answer two questions..."                                                                                             |
| <b>Methods</b>            |          |                                                                                                                                                                                            |                        |                                                                                                                                                                     |
| Study design              | 4        | Present key elements of study design early in the paper                                                                                                                                    | 3-4                    | "This analysis was part of a broader, mixed-methods study describing how young people (aged 18-24) in Kwale County obtain contraception from pharmacies." + Table 1 |
| Setting                   | 5        | Describe the setting, locations, and relevant dates, including periods of recruitment, exposure, follow-up, and data collection                                                            | 4-5                    | Table 1 + Methods text                                                                                                                                              |
| Participants              | 6        | (a) <i>Cohort study</i> —Give the eligibility criteria, and the sources and methods of selection of participants. Describe methods of follow-up                                            | 4<br>(cross-sectional) | Table 1, "In October 2017, data collectors enumerated all households..."                                                                                            |
|                           |          | <i>Case-control study</i> —Give the eligibility criteria, and the sources and methods of case ascertainment and control selection. Give the rationale for the choice of cases and controls |                        |                                                                                                                                                                     |
|                           |          | <i>Cross-sectional study</i> —Give the eligibility criteria, and the sources and methods of selection of participants                                                                      |                        |                                                                                                                                                                     |
|                           |          | (b) <i>Cohort study</i> —For matched studies, give matching criteria and number of exposed and unexposed                                                                                   |                        | N/A                                                                                                                                                                 |
|                           |          | <i>Case-control study</i> —For matched studies, give matching criteria and the number of controls per case                                                                                 |                        |                                                                                                                                                                     |

|                              |     |                                                                                                                                                                                                                                                                                                           |     |                                                                                                                        |
|------------------------------|-----|-----------------------------------------------------------------------------------------------------------------------------------------------------------------------------------------------------------------------------------------------------------------------------------------------------------|-----|------------------------------------------------------------------------------------------------------------------------|
| Variables                    | 7   | Clearly define all outcomes, exposures, predictors, potential confounders, and effect modifiers. Give diagnostic criteria, if applicable                                                                                                                                                                  | 6   | Analysis section                                                                                                       |
| Data sources/<br>measurement | 8*  | For each variable of interest, give sources of data and details of methods of assessment (measurement). Describe comparability of assessment methods if there is more than one group                                                                                                                      | N/A | Not included beyond primary outcome (to leave space to discuss qual methods)                                           |
| Bias                         | 9   | Describe any efforts to address potential sources of bias                                                                                                                                                                                                                                                 | 5   | “Data collectors entered responses save...”                                                                            |
| Study size                   | 10  | Explain how the study size was arrived at                                                                                                                                                                                                                                                                 | 4   | “The sample size was calculated based on the ARMADILLO trial’s primary outcome...”                                     |
| Quantitative variables       | 11  | Explain how quantitative variables were handled in the analyses. If applicable, describe which groupings were chosen and why                                                                                                                                                                              | 6   | Analysis section – for primary outcome                                                                                 |
| Statistical methods          | 12  | (a) Describe all statistical methods, including those used to control for confounding                                                                                                                                                                                                                     | 6   | Analysis section                                                                                                       |
|                              |     | (b) Describe any methods used to examine subgroups and interactions                                                                                                                                                                                                                                       | N/A | Based on primary outcome, no subgroups were examined                                                                   |
|                              |     | (c) Explain how missing data were addressed                                                                                                                                                                                                                                                               | N/A | Not included (to leave space to discuss qual methods)                                                                  |
|                              |     | (d) <i>Cohort study</i> —If applicable, explain how loss to follow-up was addressed<br><i>Case-control study</i> —If applicable, explain how matching of cases and controls was addressed<br><i>Cross-sectional study</i> —If applicable, describe analytical methods taking account of sampling strategy | N/A | N/A                                                                                                                    |
|                              |     | (e) Describe any sensitivity analyses                                                                                                                                                                                                                                                                     | N/A | N/A                                                                                                                    |
| <b>Results</b>               |     |                                                                                                                                                                                                                                                                                                           |     |                                                                                                                        |
| Participants                 | 13* | (a) Report numbers of individuals at each stage of study—eg numbers potentially eligible, examined for eligibility, confirmed eligible, included in the study, completing follow-up, and analysed                                                                                                         | N/A | Not included (to leave space to discuss qual methods – reference describing this in detail is included [15] on page 4) |
|                              |     | (b) Give reasons for non-participation at each stage                                                                                                                                                                                                                                                      | N/A | Not applicable (cross-section)                                                                                         |

|                          |     |                                                                                                                                                                                                              |       |                                                                                                                                           |
|--------------------------|-----|--------------------------------------------------------------------------------------------------------------------------------------------------------------------------------------------------------------|-------|-------------------------------------------------------------------------------------------------------------------------------------------|
|                          |     | (c) Consider use of a flow diagram                                                                                                                                                                           | N/A   | Not included (to leave space to discuss qual methods – reference to open source article with this information is included [15] on page 4) |
| Descriptive data         | 14* | (a) Give characteristics of study participants (eg demographic, clinical, social) and information on exposures and potential confounders                                                                     | 6-7   | Table 2                                                                                                                                   |
|                          |     | (b) Indicate number of participants with missing data for each variable of interest                                                                                                                          | N/A   | None for primary outcome                                                                                                                  |
|                          |     | (c) <i>Cohort study</i> —Summarise follow-up time (eg, average and total amount)                                                                                                                             |       |                                                                                                                                           |
| Outcome data             | 15* | <i>Cohort study</i> —Report numbers of outcome events or summary measures over time                                                                                                                          |       |                                                                                                                                           |
|                          |     | <i>Case-control study</i> —Report numbers in each exposure category, or summary measures of exposure                                                                                                         |       |                                                                                                                                           |
|                          |     | <i>Cross-sectional study</i> —Report numbers of outcome events or summary measures                                                                                                                           | 8     | Table 3                                                                                                                                   |
| Main results             | 16  | (a) Give unadjusted estimates and, if applicable, confounder-adjusted estimates and their precision (eg, 95% confidence interval). Make clear which confounders were adjusted for and why they were included | 8-9   | Table 3                                                                                                                                   |
|                          |     | (b) Report category boundaries when continuous variables were categorized                                                                                                                                    | 8-9   | Table 3                                                                                                                                   |
|                          |     | (c) If relevant, consider translating estimates of relative risk into absolute risk for a meaningful time period                                                                                             | N/A   | N/A                                                                                                                                       |
| Other analyses           | 17  | Report other analyses done—eg analyses of subgroups and interactions, and sensitivity analyses                                                                                                               | N/A   | N/A                                                                                                                                       |
| <b>Discussion</b>        |     |                                                                                                                                                                                                              |       |                                                                                                                                           |
| Key results              | 18  | Summarise key results with reference to study objectives                                                                                                                                                     | 11-12 | Discussion paragraph 1                                                                                                                    |
| Limitations              | 19  | Discuss limitations of the study, taking into account sources of potential bias or imprecision. Discuss both direction and magnitude of any potential bias                                                   | 11-12 | Discussion paragraph 2                                                                                                                    |
| Interpretation           | 20  | Give a cautious overall interpretation of results considering objectives, limitations, multiplicity of analyses, results from similar studies, and other relevant evidence                                   | 12    | Discussion section paragraph 3-4                                                                                                          |
| Generalisability         | 21  | Discuss the generalisability (external validity) of the study results                                                                                                                                        | 12    | Discussion section paragraph 3                                                                                                            |
| <b>Other information</b> |     |                                                                                                                                                                                                              |       |                                                                                                                                           |
| Funding                  | 22  | Give the source of funding and the role of the funders for the present study and, if applicable, for the original study on which the present article is based                                                | 14    | Funding statement                                                                                                                         |



1  
2  
3  
4  
5  
6  
7  
8  
9  
10  
11  
12  
13  
14  
15  
16  
17  
18  
19  
20  
21  
22  
23  
24  
25  
26  
27  
28  
29  
30  
31  
32  
33  
34  
35  
36  
37  
38  
39  
40  
41  
42  
43  
44  
45  
46

\*Give information separately for cases and controls in case-control studies and, if applicable, for exposed and unexposed groups in cohort and cross-sectional studies.

**Note:** An Explanation and Elaboration article discusses each checklist item and gives methodological background and published examples of transparent reporting. The STROBE checklist is best used in conjunction with this article (freely available on the Web sites of PLoS Medicine at <http://www.plosmedicine.org/>, Annals of Internal Medicine at <http://www.annals.org/>, and Epidemiology at <http://www.epidem.com/>). Information on the STROBE Initiative is available at [www.strobe-statement.org](http://www.strobe-statement.org).

For peer review only

# BMJ Open

## Mixed-methods study on pharmacies as contraception providers to Kenyan young people: who uses them and why?

|                                 |                                                                                                                                                                                                                                                                                                                                                                                                                                                                                                                                                                                                                                                                                                                                                                                                                                                                                                                             |
|---------------------------------|-----------------------------------------------------------------------------------------------------------------------------------------------------------------------------------------------------------------------------------------------------------------------------------------------------------------------------------------------------------------------------------------------------------------------------------------------------------------------------------------------------------------------------------------------------------------------------------------------------------------------------------------------------------------------------------------------------------------------------------------------------------------------------------------------------------------------------------------------------------------------------------------------------------------------------|
| Journal:                        | <i>BMJ Open</i>                                                                                                                                                                                                                                                                                                                                                                                                                                                                                                                                                                                                                                                                                                                                                                                                                                                                                                             |
| Manuscript ID                   | bmjopen-2019-034769.R2                                                                                                                                                                                                                                                                                                                                                                                                                                                                                                                                                                                                                                                                                                                                                                                                                                                                                                      |
| Article Type:                   | Original research                                                                                                                                                                                                                                                                                                                                                                                                                                                                                                                                                                                                                                                                                                                                                                                                                                                                                                           |
| Date Submitted by the Author:   | 10-Mar-2020                                                                                                                                                                                                                                                                                                                                                                                                                                                                                                                                                                                                                                                                                                                                                                                                                                                                                                                 |
| Complete List of Authors:       | Gonsalves, Lianne; World Health Organization, Department of Sexual and Reproductive Health and Research including UNDP/UNFPA/UNICEF/WHO/World Bank Special Programme of Research, Development and Research Training in Human Reproduction (HRP); Swiss Tropical and Public Health Institute<br>Wyss, Kaspar; Swiss Tropical and Public Health Institute; University of Basel<br>Cresswell , Jenny; World Health Organization, Department of Sexual and Reproductive Health and Research including UNDP/UNFPA/UNICEF/WHO/World Bank Special Programme of Research, Development and Research Training in Human Reproduction (HRP)<br>Waithaka, Michael; International Centre for Reproductive Health Kenya Gichangi, Peter; International Centre for Reproductive Health Kenya; University of Nairobi, Department of Human Anatomy<br>Martin Hilber, Adriane; Swiss Tropical and Public Health Institute; University of Basel |
| <b>Primary Subject Heading</b>: | Sexual health                                                                                                                                                                                                                                                                                                                                                                                                                                                                                                                                                                                                                                                                                                                                                                                                                                                                                                               |
| Secondary Subject Heading:      | Respiratory medicine, Public health                                                                                                                                                                                                                                                                                                                                                                                                                                                                                                                                                                                                                                                                                                                                                                                                                                                                                         |
| Keywords:                       | REPRODUCTIVE MEDICINE, Community child health < PAEDIATRICS, PUBLIC HEALTH, QUALITATIVE RESEARCH                                                                                                                                                                                                                                                                                                                                                                                                                                                                                                                                                                                                                                                                                                                                                                                                                            |
|                                 |                                                                                                                                                                                                                                                                                                                                                                                                                                                                                                                                                                                                                                                                                                                                                                                                                                                                                                                             |

SCHOLARONE™  
Manuscripts



I, the Submitting Author has the right to grant and does grant on behalf of all authors of the Work (as defined in the below author licence), an exclusive licence and/or a non-exclusive licence for contributions from authors who are: i) UK Crown employees; ii) where BMJ has agreed a CC-BY licence shall apply, and/or iii) in accordance with the terms applicable for US Federal Government officers or employees acting as part of their official duties; on a worldwide, perpetual, irrevocable, royalty-free basis to BMJ Publishing Group Ltd ("BMJ") its licensees and where the relevant Journal is co-owned by BMJ to the co-owners of the Journal, to publish the Work in this journal and any other BMJ products and to exploit all rights, as set out in our [licence](#).

The Submitting Author accepts and understands that any supply made under these terms is made by BMJ to the Submitting Author unless you are acting as an employee on behalf of your employer or a postgraduate student of an affiliated institution which is paying any applicable article publishing charge ("APC") for Open Access articles. Where the Submitting Author wishes to make the Work available on an Open Access basis (and intends to pay the relevant APC), the terms of reuse of such Open Access shall be governed by a Creative Commons licence – details of these licences and which [Creative Commons](#) licence will apply to this Work are set out in our licence referred to above.

Other than as permitted in any relevant BMJ Author's Self Archiving Policies, I confirm this Work has not been accepted for publication elsewhere, is not being considered for publication elsewhere and does not duplicate material already published. I confirm all authors consent to publication of this Work and authorise the granting of this licence.

# Mixed-methods study on pharmacies as contraception providers to Kenyan young people: who uses them and why?

Lianne Gonsalves<sup>123</sup>, Kaspar Wyss<sup>23</sup>, Jenny A Cresswell<sup>1</sup>, Michael Waithaka<sup>4</sup>, Peter Gichangi<sup>456</sup>, Adriane Martin Hilber<sup>23</sup>

<sup>1</sup>Department of Reproductive Health and Research including UNDP/UNFPA/UNICEF/WHO/World Bank Special Programme of Research, Development and Research Training in Human Reproduction (HRP), World Health Organization, Geneva, Switzerland

<sup>2</sup>Swiss Tropical and Public Health Institute (Swiss TPH), Basel, Switzerland

<sup>3</sup>University of Basel, Basel, Switzerland

<sup>4</sup>International Centre for Reproductive Health Kenya, Mombasa, Kenya

<sup>5</sup>Department of Human Anatomy, University of Nairobi, Nairobi, Kenya

<sup>6</sup>Ghent University, Ghent, Belgium

## Corresponding author information:

Lianne Gonsalves

Address: World Health Organization, Avenue Appia 20, 1211 Geneva, Switzerland

Telephone: +41 22 791 29 70

Email address: [gonsalvesl@who.int](mailto:gonsalvesl@who.int)

Word count, excluding title page, abstract, references, figures and tables

3961

## Abstract: 272 words

### *Objectives*

This study sought to answer two questions: 1) what are the characteristics of young Kenyans aged 18-24 who use contraception obtained at pharmacies, and 2) why are pharmacies appealing sources of contraception?

### *Design and Setting*

This was a mixed-methods study in one peri-urban part of Kwale County, Kenya. Methods included: cross-sectional survey (N=740); six focus group discussions; 18 in-depth interviews; and 25 key informant interviews. Quantitative data analysis identified factors pushing young people to pharmacies for modern contraception versus other sources. Qualitative data analysis identified reasons pharmacies were perceived to be appealing to young clients.

### *Participants*

Participants were: 1) young people aged 18-24 from the study area, including a subset who had recently purchased contraception from a pharmacy; or 2) pharmacy personnel and pharmacy stakeholders.

## 36 *Results*

37 Among surveyed participants who had ever had sexual intercourse and had used modern contraception  
38 at last sexual intercourse, 59% obtained it from a pharmacy. In multivariable analysis, participants who  
39 used a condom or emergency contraception as well as those living alone were significantly more likely  
40 to get contraception from pharmacies. Pharmacies were valued for their: convenience; privacy; non-  
41 judgmental and personable staff; service speed; and predictable, affordable prices.

## 42 *Conclusions*

43 Our findings indicate a high percentage of young people in Coastal Kenya use pharmacies for  
44 contraception. Our inclusion of emergency contraception users partially explains this. Pharmacies were  
45 perceived to be everything that health facilities are not: fast, private and non-limiting. Policymakers  
46 should recognize the role of pharmacies as contraception providers and look for opportunities to link  
47 pharmacies to the public health system. This would create a network of accessible and appealing  
48 contraception services for young people.

## 50 *Strengths and limitations of this study*

- 51 • Participants were asked to specify where they or their partner had obtained the contraception  
52 used at last sexual intercourse. This is a standard question for studies looking to establish  
53 contraception prevalence. Our not further ascertaining who specifically obtained the  
54 contraception affected our ability to distinguish differences in preferences of young men versus  
55 young women.
- 56 • One participant group (young people who had recently purchased contraception from a  
57 pharmacy) was recruited from five purposively selected pharmacies: this may limit the  
58 generalizability of the findings.
- 59 • This study is strengthened by its mixed methods design and inclusion of both pharmacy  
60 personnel and young people to triangulate research findings on a sensitive subject.

61  
62  
63

## 64 INTRODUCTION

65 Young people need access to contraception. However, around the world, and in low- and middle-income  
66 countries in particular, public sector contraceptive services are not meeting this need. Data from 61 low-  
67 and middle-income countries estimated that 33 million young women aged 15-24 had an unmet need  
68 for family planning.[1] Adolescents (ages 10-19 years) and youth (15-24 years) are often reluctant to  
69 access contraception at public health facilities where they may encounter a lack of privacy, biased  
70 providers, and limited contraceptive options, in addition to broader financial, legal, social, and cultural  
71 barriers. [2, 3]

72 Other parts of the health system may be able to step in to help fill this gap. In Kenya (where this study  
73 took place) and in the region, private pharmacies have become a source of modern contraception for  
74 young people. [4-7] Additional research has indicated that when contraception is introduced in  
75 pharmacies, access improves for young people.[8, 9] An analysis of 33 sub-Saharan African countries  
76 found that commercial drug sellers, including pharmacies, were the source of the most recent  
77 contraceptive method for nearly one in five young people between 15-24 years of age. [8] When also  
78 factoring in other informal and non-medical providers, including shops, these sources together serviced  
79 nearly half of women age 15-19. [8]

80 Kenya's National Family Planning Guidelines allow for the provision of several kinds of modern methods  
81 [10] of contraception to be dispensed by pharmacists or pharmaceutical technologists [11](colloquially  
82 referred to as 'chemists'). These include barrier methods like male and female condoms, as well as  
83 short-acting methods including emergency contraception (ECP), oral contraceptive pills, and injectable  
84 contraception. Injectables can be dispensed but not administered. These permissions mean that outside  
85 of health facilities, private retail pharmacies have the largest selection of modern methods available  
86 (shopkeepers can also sell condoms, per the guidelines). Private retail pharmacies must be opened by  
87 and should always operate under the supervision of either a pharmacist or pharmaceutical  
88 technologist.[12]

89 Despite their demonstrable popularity among young people, there is little data on the individual-level  
90 circumstances or characteristics of young people that would drive them to pharmacies for  
91 contraception. Therefore, we conducted a mixed-methods study describing how young people (aged 18-  
92 24) in Kwale County obtain contraception from pharmacies. Kwale County is one of six counties in  
93 Kenya's former Coast region. Young people between the ages of 15-24 were projected to make up 19%  
94 of the county's population by 2018.[13] In 2014, contraception prevalence in the county was 38%, lower  
95 than the national average of 53%. [14]

96 In this analysis, we sought to answer two questions: 1) what are the characteristics of young people who  
97 use contraception obtained at pharmacies, and 2) why are pharmacies appealing sources of  
98 contraception to young people?

## 99 METHODS

100 The study took place in the peri-urban areas of Kwale Town and Ukunda, as well as the stretch of  
101 highway connecting the two towns. Data collection took place between October 2017 and March 2018.  
102 We used several methods (captured in Table 1) to understand the experiences of pharmacy personnel  
103 and young people themselves. This study was partly-nested in the ARMADILLO randomized controlled  
104 trial (RCT)[15], which assessed the effect of an unrelated digital health intervention on sexual and  
105 reproductive health-related outcomes for young people aged 18-24.

### 106 Table 1 Study Methods

| Method                          | N                                                   | Eligibility criteria                                                                                                                                                                                                                             | Relevant topics addressed                                                                                                                                                 |
|---------------------------------|-----------------------------------------------------|--------------------------------------------------------------------------------------------------------------------------------------------------------------------------------------------------------------------------------------------------|---------------------------------------------------------------------------------------------------------------------------------------------------------------------------|
| <b>Cross-sectional survey*</b>  | <b>740</b>                                          | <ul style="list-style-type: none"> <li>• Age 18-24</li> <li>• Literate</li> <li>• Have their own mobile phone (with them at time of recruitment) and report regular use</li> <li>• Report current use of text messaging</li> </ul>               | <ul style="list-style-type: none"> <li>• Contraception used at last sexual intercourse and source</li> <li>• Demographic and behavioral characteristics</li> </ul>        |
| <b>Focus group discussions*</b> | <b>6 (58 participants)</b>                          | <ul style="list-style-type: none"> <li>• Age 18-24</li> <li>• Community members</li> </ul>                                                                                                                                                       | <ul style="list-style-type: none"> <li>• Sources of contraception for young people</li> <li>• Characteristics of young people who use each source</li> </ul>              |
| <b>In-depth interviews</b>      | <b>18</b>                                           | <ul style="list-style-type: none"> <li>• Age 18-24</li> <li>• Recently purchased contraception at pharmacy</li> </ul>                                                                                                                            | <ul style="list-style-type: none"> <li>• Reasons for having purchased contraception from pharmacy</li> <li>• What was valued (and not valued) about experience</li> </ul> |
| <b>Key-informant interviews</b> | <b>19 (pharmacy personnel)<br/>6 (stakeholders)</b> | <ul style="list-style-type: none"> <li>• Age 18+</li> <li>• Pharmacy personnel (any role) OR</li> <li>• Pharmacy-related stakeholder (Ministry of Health; regulatory agency; professional association; non-governmental organization)</li> </ul> | <ul style="list-style-type: none"> <li>• Characteristics of young people who purchase contraception</li> <li>• What clients appreciate about experience</li> </ul>        |

107 \* Methods which were nested in the broader ARMADILLO Study, a digital health intervention RCT.  
108 Inclusion/exclusion criteria for these nested methods were determined by ARMADILLO's objectives.

109 To capture the perspectives of young people, a cross-sectional survey of young people age 18-24  
110 captured demographic information and contraceptive use patterns, including source of last  
111 contraception (these questions were one section of a broader survey conducted as part of the baseline  
112 assessment for the ARMADILLO trial). The sample size was calculated based on the ARMADILLO trial's  
113 primary outcome – the full protocol for the trial has been previously published[15], along with details of  
114 participants recruited.[16]

115 To identify participants, we obtained a map of the study area from the Kenya National Bureau of  
116 Statistics. The KNBS divides the country into so-called 'enumeration areas' (EAs) in preparation for the  
117 country's 2019 census. EAs consist of blocks of households. Each EA had approximately 100 households.  
118 In October 2017, data collectors enumerated all age-eligible young people in every household using a  
119 random selection of 21 EAs in the study area. From this list of age-eligible youth, a random selection of  
120 households and random selection of one youth per household was generated. Data collectors visited the  
121 selected households to recruit participants (who met eligibility criteria captured in Table 1) starting in  
122 February 2018.

123 Additionally, six Focus Group Discussions were conducted with young people age 18-24, purposively  
124 recruited from the community by data collectors. Finally, we conducted in-depth interviews with 18

1  
2  
3 125 young people aged 18-24 who had recently purchased contraception from pharmacies. We purposively  
4 126 recruited these young participants in one of two ways. First, we stationed a young data collector outside  
5 127 of well-trafficked pharmacies over three evenings, who recruited young people purchasing  
6 128 contraception. Second, several pharmacists in the study area were provided with leaflets with study  
7 129 information and requested to provide these to young contraception purchasers at the end of a  
8 130 transaction.

10 131 To capture the perspectives of pharmacy personnel, data collectors mapped all private, retail  
11 132 pharmacies in the study area using a digital form with an embedded geolocator. A random subset of  
12 133 pharmacies was generated using the random number generator in Excel. Pharmacies were well-  
13 134 distributed across the study area. In each selected pharmacy, data collectors were instructed to  
14 135 approach the first person behind the counter, regardless of rank or level of training, explain the study  
15 136 and ask if they would be interested in participating. Nineteen interviews in total were conducted. An  
16 137 additional six key-informant interviews were conducted with stakeholders from the regulatory  
17 138 Pharmacy and Poisons Board, Ministry of Health, professional associations, and non-governmental  
18 139 organizations. These were conducted in the individuals' offices in either Ukunda, Mombasa, or Nairobi.  
19 140 Stakeholder participants were contacted first by phone or email, the studied explained, and a  
20 141 convenient time for an in-person visit set.

## 23 24 142 **Data collection and management**

25 143 We obtained informed consent from all participants prior to participation. All data were collected in  
26 144 English, Swahili, or a mix of the two, depending on participants' preference. Quantitative surveys were  
27 145 close-ended and administered using webforms on a tablet. Data collectors entered responses save for  
28 146 the questions related to participants' sexual and contraceptive use history; here, to reduce potential  
29 147 discomfort and response bias, participants entered their own responses. Interviews and FGDs used  
30 148 semi-structured guides: FGD (S1), in-depth interview (S2), and key-informant interview (S3) guides are  
31 149 provided as supplementary material, as are relevant survey components (S4). Qualitative data collection  
32 150 was informed by ground theory [17], allowing us to adopt an iterative approach, with question guides  
33 151 modified based on emerging themes. Qualitative data collection ceased upon reaching saturation. All  
34 152 qualitative methods used audio-recording (with participant permission). All study activities were  
35 153 conducted in a private location. Data collectors, speaking both English and Swahili, were recruited from  
36 154 the study area and specifically trained for this study.

39 155 This study received ethics approval from the Ethikkommission Nordwest- und Zentralschweiz (EKNZ)  
40 156 (Req-2017-00389) in Basel, Switzerland, as well as the University of Nairobi/Kenyatta National Hospital  
41 157 in Nairobi, Kenya (P274/05/2017). The ARMADILLO RCT also received ethics approval from the World  
42 158 Health Organization (Protocol WHO A65892) and is registered with the ISRCTN Registry  
43 159 (ISRCTN85156148).

## 45 46 160 **Patient and public involvement**

47 161 Our population (young people) were directly involved in parts of the study's design and implementation.  
48 162 Our survey data collection team consisted of young people recruited from the study area (Kwale  
49 163 County). Qualitative method data collectors were also young people recruited from both Kwale and  
50 164 Mombasa Counties. We relied on their insight and lived experience to determine how young people  
51 165 would feel most comfortable being recruited. We jointly designed our recruitment and consenting  
52 166 procedures. A dissemination meeting involving local, county, and national stakeholders (including some  
53 167 pharmacy stakeholder participants) took place in June, 2019. Several young data collectors were invited  
54 168 to attend and they provided commentary on the findings.



## 169 **Researcher characteristics and reflexivity**

170 Data collectors were young people (nearly even numbers of men and women – 24 in total) recruited  
171 from Kwale and Mombasa counties. Kwale County data collectors were familiar with the study area and  
172 recognized within their communities, which facilitated enumerating pharmacies, recruiting youth  
173 participants, and getting consent to interview pharmacy personnel. They were also less educated and  
174 less experienced than data collectors from Mombasa County. This, at times, resulted in a subordinate  
175 dynamic with some pharmacy personnel participants who were university-educated. The first author  
176 conducted all interviews with pharmacy stakeholders. She is from the United States (from a racial  
177 minority group different from the study population) and presented as an outsider (someone not from  
178 Kenya) to interviewees. Her position (leading the study and professional affiliations) resulted in  
179 respondents treating her collegially and being open to participate.

## 180 **Analysis**

181 Quantitative data were analyzed in Stata Version 14. The subject of the analyses (as described in Figure  
182 1) were survey participants who reported using one of four contraception commodities available in  
183 pharmacies (either male or female condom, ECP, daily contraceptive pills, or injectable contraception) at  
184 last sexual intercourse *and* who reported their source. Sexual intercourse was presumed to be  
185 penetrative vaginal sex. Excluded were those participants who had not used contraception at last sexual  
186 intercourse, who had not used a contraceptive commodity (withdrawal method, calendar days), who  
187 could not remember where they had obtained their method and/or who had obtained it from a partner  
188 or friend. We developed a dichotomous ‘source of family planning’ outcome, distinguishing between  
189 ‘pharmacy’ and ‘any other source’. The latter included any public or private health facility, community-  
190 based distributors, non-governmental organizations, shops, schools, supermarkets. Following  
191 descriptive statistics, bivariate log binomial regressions assessed the association between the outcome  
192 and each behavioral/sociodemographic variable of interest. Any analysis showing a  $p < .2$  moved the  
193 variable into a multivariable Poisson regression model with robust 95% CIs.

## 194 **Figure 1 Flow Diagram of Study Participants**

195 All qualitative data were analyzed using the Framework Method. [18] Data were first transcribed  
196 verbatim and then translated (if necessary) into English. For a sub-section of Swahili-language  
197 interviews, English-language transcripts were compared against the original Swahili-language interview  
198 audio file by another member of the research team to ensure consistency. Qualitative analysis for the  
199 broader study was guided by the five, *WHO-defined dimensions of quality health services to adolescents*:  
200 equity, accessibility, acceptability, appropriateness, and effectiveness. [19] All transcripts were read  
201 once to improve familiarity with the data. Then, qualitative analysis was conducted in Atlas.ti Version 8,  
202 with deductive and then inductive coding of a subset of transcripts to develop and refine a coding  
203 framework. Deductive coding was informed by the ‘accessibility’ and ‘acceptability’ dimensions and  
204 broadly captured any reference to pharmacies being ‘appealing’. Inductive coding of these data then  
205 identified specific reasons for appeal, subsequently grouping these into broad categories related to  
206 pharmacy outlet, personnel, and service appeal. These broad categories and individual reasons structure  
207 the presentation of the qualitative results.

## 208 RESULTS

### 209 Survey sample characteristics

210 A total of 1170 youth were approached for participation, of which 740 (63%) consented to participate  
 211 and completed the survey. Reasons for non-participation are captured in Figure 1. As seen in Table 2, of  
 212 the 740 young people aged 18-24 who participated in the cross-sectional survey, 512 (69%) had ever  
 213 had sexual intercourse. Male condoms were the most popular form of contraception purchased, used by  
 214 190 of the 274 (69%) participants who used contraception at last sexual intercourse. Of the participants  
 215 indicating that they used a modern contraceptive at last sexual intercourse (N=263), 154 (59%, data not  
 216 shown) had obtained it from a private, retail pharmacy (hereafter, 'pharmacy').

217 **Table 2 Baseline characteristics**

|                                                        |  | All surveyed participants (N=740)                                           |               |               |
|--------------------------------------------------------|--|-----------------------------------------------------------------------------|---------------|---------------|
|                                                        |  | Female                                                                      | Male          | Total         |
| Ever had sexual intercourse                            |  | 231/347                                                                     | 281/393       | 512/740 (69%) |
| Used any contraception at last sexual intercourse      |  | 126/231 (55%)                                                               | 148/281 (53%) | 274/512 (54%) |
| Used a modern contraceptive at last sexual intercourse |  | 118/231 (51%)                                                               | 145/281 (52%) | 263/512(51%)  |
| Used pharmacy-available contraception*                 |  | 116/231 (50%)                                                               | 143/281 (51%) | 259/512 (51%) |
| Where contraception was obtained                       |  | (N=116)                                                                     | (N=143)       | (N=259)       |
| Pharmacy                                               |  | 63%                                                                         | 56%           | 59%           |
| Shop                                                   |  | 5%                                                                          | 17%           | 11%           |
| Public dispensary or health centre                     |  | 13%                                                                         | 7%            | 10%           |
| Hospital                                               |  | 11%                                                                         | 6%            | 8%            |
| NGO, private doctor                                    |  | 3%                                                                          | 4%            | 4%            |
| Community-based distributor, school, supermarket       |  | 1%                                                                          | 2%            | 2%            |
| Other person**                                         |  | 1%                                                                          | 4%            | 3%            |
| Other source (not specified)/Don't know **             |  | 3%                                                                          | 3%            | 3%            |
|                                                        |  | <b>Included participants using pharmacy-available contraception (N=243)</b> |               |               |
|                                                        |  | Female (N=111)                                                              | Male (N=132)  | Total (N=243) |
| Age                                                    |  |                                                                             |               |               |
| 18-19                                                  |  | 17%                                                                         | 18%           | 18%           |
| 20-24                                                  |  | 83%                                                                         | 82%           | 82%           |
| Education (highest level attended)                     |  |                                                                             |               |               |
| Primary or below                                       |  | 54%                                                                         | 27%           | 40%           |
| Secondary                                              |  | 38%                                                                         | 55%           | 47%           |
| Post-secondary                                         |  | 8%                                                                          | 18%           | 14%           |
| Relationship status                                    |  |                                                                             |               |               |
| Single                                                 |  | 23%                                                                         | 42%           | 33%           |
| Friends with benefits                                  |  | 3%                                                                          | 8%            | 5%            |
| Dating                                                 |  | 42%                                                                         | 42%           | 42%           |
| Cohabiting                                             |  | 3%                                                                          | 1%            | 2%            |
| Engaged                                                |  | 9%                                                                          | 5%            | 7%            |
| Married                                                |  | 20%                                                                         | 3%            | 11%           |
| Any children                                           |  |                                                                             |               |               |

|                               |     |     |     |
|-------------------------------|-----|-----|-----|
| No                            | 74% | 92% | 84% |
| Yes                           | 26% | 8%  | 16% |
| Living situation              |     |     |     |
| Lives alone                   | 8%  | 23% | 16% |
| Lives with family (dependent) | 66% | 73% | 70% |
| Lives with child or partner   | 26% | 4%  | 14% |
| Contraception used***         |     |     |     |
| Male condom                   | 56% | 86% | 72% |
| Female condom                 | 4%  | 2%  | 2%  |
| ECP                           | 20% | 6%  | 12% |
| Daily contraceptive pills     | 5%  | 2%  | 3%  |
| Injection                     | 16% | 5%  | 10% |

218 \*these included male or female condom, emergency contraception (ECP), daily contraceptive pills, and injectable  
219 contraception

220 \*\*these were excluded from analysis

221 \*\*\*Participants could enter one contraceptive method

222 Of the 243 participants who were included in bivariate and multivariable analyses, 54% were male, 61%  
223 had attended secondary school or higher, and 70% were dependents (living with parents, grandparents,  
224 or other older family members). A higher proportion of female participants than male participants were  
225 cohabiting, engaged, or married and had at least one child. Male participants had attended higher levels  
226 of schooling than female participants. Supplementary Table 1 presents selected characteristics of the  
227 243 participants disaggregated by whether they obtained contraception at a pharmacy, shop, or any  
228 other source: most shop users were male and purchased condoms.

### 230 Who accesses contraception from pharmacies?

231 Bivariate analyses (Table 3) indicated there was no evidence of an association between either age, sex,  
232 or education and a young person's contraception being from a pharmacy. There was an association  
233 between pharmacy-purchased contraception and a participant's relationship status, and whether they  
234 had children. The greatest predictors of whether a young person had visited a pharmacy were the type  
235 of contraception they purchased and with whom they lived. Following multivariate analysis (Table 3),  
236 there remained strong evidence of an association between pharmacy purchase of contraception and a  
237 young person's relationship status, living situation, as well as the type of contraception they used. Young  
238 people living alone were almost twice as likely to have sourced contraception from a pharmacy as those  
239 living with a child or partner (Adjusted PR 1.96, 95% CI [1.07-3.59]). Use of ECP remained the greatest  
240 predictor of a pharmacy purchase (Adjusted PR 2.27 as compared with pill/injection use 95% CI [1.21-  
241 4.27]).

242  
243 **Table 3 Bivariate and multivariable analysis to identify personal characteristics that may be associated**  
244 **with a young person obtaining contraception from a pharmacy (vs any other source)**

|       | Purchased<br>contraception<br>from<br>pharmacy | Unadjusted<br>Prevalence<br>Ratio (PR) [95%<br>CI] | p-<br>value* | Adjusted<br>Prevalence Ratio<br>(PR) [95% CI] | p-value |
|-------|------------------------------------------------|----------------------------------------------------|--------------|-----------------------------------------------|---------|
| All   | 153/243 (63%)                                  |                                                    |              |                                               |         |
| Age   |                                                |                                                    |              |                                               |         |
| 18-19 | 27/43 (63%)                                    | Ref                                                |              |                                               |         |

|                                |               |                  |        |                   |        |
|--------------------------------|---------------|------------------|--------|-------------------|--------|
| 20-24                          | 126/200 (63%) | 1.00 [0.78-1.29] | 0.979  |                   |        |
| Sex                            |               |                  |        |                   |        |
| Male                           | 80/132 (61%)  | Ref              |        |                   |        |
| Female                         | 73/111 (66%)  | 1.09 [0.90-1.32] | 0.405  |                   |        |
| Education                      |               |                  |        |                   |        |
| Primary or below               | 60/96 (63%)   | Ref              |        |                   |        |
| Secondary or above             | 93/147 (63%)  | 1.01 [0.83-1.23] | 0.904  |                   |        |
| Relationship status            |               |                  |        |                   |        |
| Single                         | 46/81 (57%)   | 0.76 [0.61-0.94] | 0.0013 | 0.75 [0.61-0.93]  | 0.0284 |
| Dating/'Friends with benefits' | 86/115 (75%)  | Ref              |        | Ref               |        |
| Married/Engaged/Cohabiting     | 21/47 (45%)   | 0.60 [0.43-0.84] |        | 0.95 [0.67-1.35]  |        |
| Children                       |               |                  |        |                   |        |
| No                             | 139/204 (68%) | 1.89 [1.24-2.92] | 0.003  | 1.25 [0.80-1.97]  | 0.318  |
| Yes                            | 14/39 (36%)   | Ref              |        | Ref               |        |
| Living situation               |               |                  |        |                   |        |
| Lives alone                    | 30/39 (77%)   | 2.62 [1.51-4.53] | 0.0024 | 1.96 [1.07-3.59]  | 0.0119 |
| Lives with family (dependent)  | 113/170 (66%) | 2.26 [1.33-3.85] |        | 1.53 [0.84-2.82]  |        |
| Lives with child or partner    | 10/34 (29%)   | Ref              |        | Ref               |        |
| Contraception used             |               |                  |        |                   |        |
| Condom (m/f)                   | 120/181 (66%) | 2.36 [1.34-4.14] | 0.0014 | 1.87 [1.02- 3.43] | 0.0224 |
| ECP                            | 24/30 (80%)   | 2.84 [1.59-5.09] |        | 2.27 [1.21-4.27]  |        |
| Pills/Injection                | 9/32 (28%)    | Ref              |        | Ref               |        |

245 \*any variable with p-values <.2 in bivariate analysis were included in the multivariable analysis

### 246 Qualitative methods participant characteristics

247 Three FGDs were held with young men, and three with young women – each FGD had approximately ten  
 248 participants. Of the 18 in-depth interview participants, ten were young women and eight were young  
 249 men. Female IDI participants had most recently purchased emergency contraception (n=7), injection  
 250 (n=2), and condom (n=1). Male IDI participants had most recently purchased condom (n=6), and  
 251 emergency contraception (n=2).

252 Of the 19 key informant participants, 10 interviewed pharmacy personnel were women, 9 were men.  
 253 Participants were not probed in detail on their formal training (and therefore whether they should be  
 254 operating in their current role). That said, we could ascertain that 13 of the participants had an  
 255 appropriate amount of training for their reported tasks, and four did not (the final two were unclear).  
 256 Self-reported education ranged from having some secondary education to full training as a pharmacist  
 257 or pharmaceutical technologist. One participant was a nurse. Stakeholders demographics are not  
 258 described to ensure they remain unidentifiable.

### 259 Why are pharmacies appealing?

260 Participants indicated that it was a combination of the pharmacy *outlet*, the pharmacy *personnel*  
 261 themselves, and the *services* provided by the pharmacy which together made these establishments the  
 262 preferred source of contraception for many young people (Table 4).

### 263 Table 4 Reasons why pharmacies are appealing (selected excerpts from qualitative data)

|                                   |                                                                                                                                                                                                                                                                                                                                                                                                                                                                                                                                                                                                                                                                                                                                                                                                                                       |
|-----------------------------------|---------------------------------------------------------------------------------------------------------------------------------------------------------------------------------------------------------------------------------------------------------------------------------------------------------------------------------------------------------------------------------------------------------------------------------------------------------------------------------------------------------------------------------------------------------------------------------------------------------------------------------------------------------------------------------------------------------------------------------------------------------------------------------------------------------------------------------------|
| <b>Outlet appeal</b>              | <i>The physical pharmacy environment and its operation</i>                                                                                                                                                                                                                                                                                                                                                                                                                                                                                                                                                                                                                                                                                                                                                                            |
| Convenience (locations and hours) | <p>“The chemist is near and whenever you want it [family planning] you can access it, anytime.” Female pharmacy purchaser: injection</p> <p>“The good thing with chemist is that they are many of them...when you missed a certain contraceptive at a certain chemist you can go to the next chemist because they are several of them, not like the hospital” – Female community member (FGD)</p> <p>“Yes, majority of them [young people] don’t live near health centres. Second, health centres are usually busy. And it’s not every day they [can be] attended to: there are specific days they have clinics... [The client] won’t be able to make it there...even if the treatment was free. But there is a chemist - [they] can go for similar services.” – Pharmacist</p>                                                       |
| Anonymity                         | <p>“At the chemist there are not many people. I may go to Diani dispensary [a local public health facility], and there is someone who knows me and I go for family planning. I saw it would be better to go the chemist because I know that will be my secret and the attendant.” Female pharmacy purchaser: emergency contraception</p> <p>“When you go to the facility, when you go to the FP room, everyone knows that you’ve gone to get FP. For young people [especially] because no one will want to see me - I’m 18, I’m 16 and I’m already using family planning. I’m not supposed to be sexually active. The kind of population that is in those FP areas, around those FP areas it’s your mothers who are either breastfeeding, or they’re pregnant and have gone for ANC.” – Ministry of Health official, County level</p> |
| <b>Personnel appeal</b>           | <i>The person behind the counter</i>                                                                                                                                                                                                                                                                                                                                                                                                                                                                                                                                                                                                                                                                                                                                                                                                  |
| Interpersonal relationship        | <p>“the chemist is just within the neighborhood and I know the guy he is my friend outside job so it wasn’t stressful for me in fact it was really fast and easy.” – Male pharmacy purchaser: ECP and condoms</p> <p>“The person in charge is my friend, I can go to him with my problems and he would assist me, he is not that far for me to reach him with my phone - he is my neighbor I could have a problem even at night and be able to reach out to him.” -Male pharmacy purchaser: ECP</p>                                                                                                                                                                                                                                                                                                                                   |
| Seen as part of the community     | <p>“I chose it because it has been there for many years even before I was born till the time I finished school. The attendants are just normal. Many people get help from there so I saw it good to also go there.” – Female pharmacy purchaser: ECP and injection</p> <p>“What I had said about the hospital, when you get there you will find the person who served you before is transferred but when you come to the chemist you will find the person that served you before.” – Female community member (FGD)</p>                                                                                                                                                                                                                                                                                                                |
| Non-judgmental                    | <p>“I thought at the chemist they will understand me and I would talk to them [better] than at the hospital where they will say I do not need to use those things or even talk to me harshly.” –Male pharmacy purchaser: ECP and condoms</p>                                                                                                                                                                                                                                                                                                                                                                                                                                                                                                                                                                                          |

|                       |                                                                                                                                                                                                                                                                                                                                                                                                                                                                                                                                                                                                                                                                                                                                                                                                                                                                                                                                                                                                                                                                                                                                                                                                                                                                                                                                     |
|-----------------------|-------------------------------------------------------------------------------------------------------------------------------------------------------------------------------------------------------------------------------------------------------------------------------------------------------------------------------------------------------------------------------------------------------------------------------------------------------------------------------------------------------------------------------------------------------------------------------------------------------------------------------------------------------------------------------------------------------------------------------------------------------------------------------------------------------------------------------------------------------------------------------------------------------------------------------------------------------------------------------------------------------------------------------------------------------------------------------------------------------------------------------------------------------------------------------------------------------------------------------------------------------------------------------------------------------------------------------------|
|                       | <p>“At the chemist, that person wants - since it is a business – [to] just give, as compared to the hospital where when you get there you will find nurses who are arrogant or other doctors who will insult you.” Male community member (FGD)</p>                                                                                                                                                                                                                                                                                                                                                                                                                                                                                                                                                                                                                                                                                                                                                                                                                                                                                                                                                                                                                                                                                  |
| <b>Service appeal</b> | <i>The contraception-purchasing transaction</i>                                                                                                                                                                                                                                                                                                                                                                                                                                                                                                                                                                                                                                                                                                                                                                                                                                                                                                                                                                                                                                                                                                                                                                                                                                                                                     |
| Speed                 | <p>You know at the dispensary it is a must you meet with the doctor for more explanation. And maybe there is a service you need to pay for, the expenses are many at the dispensary unlike the chemist where everything is fast, when you get there you get what you want and leave. – Youth female, has purchased ECP and condoms</p> <p>“You get in a hospital, there are so many people queueing outside that are waiting to see a doctor. Here comes a young lady who is in a hurry. That particular person will find it more convenient to go to a chemist shop rather than going to a hospital.” – Pharmacist</p>                                                                                                                                                                                                                                                                                                                                                                                                                                                                                                                                                                                                                                                                                                             |
| Cost                  | <p>It is not easy for the government hospital. It is best, if you have money, you go to private hospitals. Now that is why you see if someone does not have money, or us the young people, we just go to the chemist because there is no cash to see a doctor for Ksh 600. At the chemist you just go direct and you are served. – Male pharmacy purchaser: ECP and condoms</p> <p>Chemists are not expensive like hospitals. In hospital you can be told it is a government hospital but you end up being asked to give out a lot of money. In [the] chemist the money you get asked is for [paying for] P2 [an emergency contraceptive], yah but in hospital you will be told to do some test because we think it is this and this.– Female pharmacy purchaser: ECP</p> <p>Free does not always mean free. Sometimes, something will be free, but by the time you get it, the process is a lot. Because for us, we don't just offer family planning, we do [mandatory] counselling. The person who is going to a chemist is someone who has made up his or her mind. But in the public facilities, you are counselled, you are explained to, you are told the different methods, then you are given a chance to make an informed choice. So, I think that...is a barrier somehow. – Ministry of Health Official, County level</p> |

264 Pharmacy outlets were appealing because of the convenience and anonymity they offered young clients.  
 265 Pharmacies were located where young people lived, worked, and spent time, making them easy  
 266 contraception access points. If one pharmacy lacked what a young person was looking for, it was a short  
 267 trip to the next one. ‘Convenience’ also extended to the days and hours pharmacies were open. This  
 268 made them especially important on days where health facilities were known to be busy, or evening and  
 269 weekend hours when young people might need contraception.

270 Additionally, the relative privacy offered by pharmacies was especially important to young clients.  
 271 Participants perceived pharmacies, with interactions limited to a pharmacy attendant and a client, to be  
 272 far more discreet than similar services offered at public health facilities. Public health facilities had  
 273 public waiting areas where young people may see someone they knew. Additionally, services in the  
 274 health facility might be categorized by service type (for example, contraceptive services separated from  
 275 immunization services, etc). This left young clients feeling particularly exposed should they need to walk  
 276 up to a labeled ‘family planning’ window or step forward if a public announcement about contraceptive  
 277 services was made.

1  
2  
3 278 The individuals behind the counter, and how they interacted with young people, were additional  
4 279 reasons young people preferred to obtain contraception from pharmacies. Pharmacy personnel were  
5 280 perceived to be established, fellow community members. Young clients appreciated seeing the same  
6 281 familiar faces, with less of the personnel turnover associated with public health facilities. When  
7 282 personnel were a similar age to young clients (a very strong preference of all young participants), many  
8 283 reported being able to communicate openly with pharmacy personnel and being more comfortable  
9 284 interacting with them.

11 285 Pharmacy personnel were perceived to be non-judgmental compared with those working in health  
12 286 facilities. There was a perception that a trip to a facility would result in difficult questions, and a possible  
13 287 refusal to provide the desired contraceptive. Pharmacy personnel, by contrast, would treat young  
14 288 people “well”. That is, they would provide the desired contraceptive without interrogation. Several  
15 289 participants speculated that the for-profit aspect of pharmacies could be a reason that they were  
16 290 treated better and not refused services.

19 291 Finally, pharmacy contraception services themselves were appreciated for being fast and cheap.  
20 292 Participants routinely referenced the queueing for services and long wait times driving young people  
21 293 away from health facilities and into pharmacies instead. Services were also perceived to be cheaper than  
22 294 both private health facility services as well as public health facility services. Private health facilities were  
23 295 considered out of financial reach for most young people – making a pharmacy a more affordable option.  
24 296 However, at public health facilities, where contraception-related services are meant to be free,  
25 297 participants indicated that this was often not the case in practice. Expenses related to travel, or ‘tests’  
26 298 (for example, a pregnancy test) ordered by health care providers prior to dispensing contraception made  
27 299 real costs related to public services difficult to predict. Finally, as one government official acknowledged,  
28 300 even when services were free, the time and processes required could deter young people who knew  
29 301 what they wanted from going to facilities.

## 32 302 **DISCUSSION**

34 303 This mixed-method study determined pharmacies to be the most popular source of contraception for  
35 304 young people in a peri-urban area of Kwale County. In total, 59% of participants (and 63% female  
36 305 participants) who had ever had sex and self-reported use of a modern contraceptive at last sexual  
37 306 intercourse had obtained their contraception from a pharmacy. This is higher than previously reported  
38 307 for Kenya as a whole. [8] Multivariable analyses indicated that young people who were still living at  
39 308 home with family relied more heavily on pharmacies for contraception more than their peers. That said,  
40 309 the strongest predictor of young people’s contraception coming from pharmacies was the type of  
41 310 contraception they used, specifically emergency contraception. Qualitative findings demonstrated that  
42 311 young people valued pharmacies for their convenience, anonymity, non-judgmental and personable  
43 312 staff, service speed, as well as predictable and affordable prices.

46 313 Together, these mixed methods indicate that pharmacies provide a valued source of contraception for  
47 314 those young people who may face increased scrutiny or gatekeeping in health facilities. For young  
48 315 people using condoms or ECP, the reported convenience and speed of service explains the strong  
49 316 preference for pharmacies. Following unprotected sex, a young person needing ECP would  
50 317 understandably prefer to pay for it at a nearby pharmacy instead of traveling to a health care facility,  
51 318 waiting in line, and negotiating with a possibly reluctant health worker to obtain it for free (assuming  
52 319 the public facility stocked ECP [20]).

54 320 This study had several limitations. In the survey, participants were asked to specify where they or their  
55 321 partner had obtained the contraception used at last sexual intercourse. This question is standard in

1  
2  
3 322 studies looking to establish contraception prevalence. However, our not further ascertaining whether it  
4 323 was the respondent or their partner *who picked up the contraception* affected our ability to distinguish  
5 324 differences in preferred sources between young men who obtain contraception versus young women  
6 325 who obtain contraception. Second, to recruit young people who had recently purchased contraception  
7 326 from pharmacies, we relied on assistance from five pharmacies, purposively selected. It is possible that  
8 327 young purchasers patronizing different pharmacies might have had different experiences than those  
9 328 captured here. Finally, our youth participants in focus group discussions may have felt uncomfortable  
10 329 discussing contraceptive use in a group; we attempted to mediate this by structuring discussion around  
11 330 vignettes of 'typical' young people. This study is strengthened by its mixed methods design and its use of  
12 331 multiple qualitative methods, and inclusion of both pharmacy personnel and young people to  
13 332 triangulate research findings on a sensitive subject.

16 333 Our quantitative findings differ substantially from an analysis of Kenya's DHS (KDHS) data, which found  
17 334 that nationwide, 13% of Kenyan women aged 15-24 currently using contraception reported obtaining it  
18 335 at a commercial drug seller. [8] There may be several reasons for this, in addition to the four years  
19 336 between the KDHS and our own data collection. Our study area was a peri-urban setting while the DHS  
20 337 analysis uses nationwide data. Over 70% of Kenya's population is rural. [21] Finally, our study's inclusion  
21 338 of emergency contraception and measuring contraception use at last sexual intercourse (rather than  
22 339 'current use') is also a likely contributor. Twelve percent of participants in this study used emergency  
23 340 contraception at last sexual intercourse, and the KDHS did not specifically capture emergency  
24 341 contraception use [22]. The DHS's measures of contraception 'current use' in general has been  
25 342 previously critiqued for not being able to capture contraceptive methods which may be used  
26 343 periodically, including ECP.[23] Our link between ECP purchasers and pharmacies are in line with earlier  
27 344 data from urban Kenya, which indicated that upwards of 96% of adult women needing emergency  
28 345 contraception obtained it at a pharmacy.[24]

31 346 By contrast, our qualitative findings were largely in line with previous research. One systematic review  
32 347 featuring studies mostly from high-income countries (HICs) affirms that young people appreciate  
33 348 pharmacies for their convenience, speed of service and ease of contraception access.[9] However, this  
34 349 review also reported mixed evidence (all from HICs) as to whether pharmacy services were considered  
35 350 'private'[9], while our study found an almost universal appreciation of pharmacies for their  
36 351 anonymity/privacy. This difference may be a result of different dispensing protocols and establishment  
37 352 layouts in pharmacies and public health facilities in HICs vs LMICs. Preliminary evidence from other  
38 353 LMICs corroborates our findings that among young people[25], and the general population[26],  
39 354 pharmacies' contraception services are appreciated for the privacy offered.

42 355 While this study focused on pharmacies, its findings also cover perceptions around how contraception  
43 356 services are delivered to young people in public health facilities. Pharmacies were naturally contrasted  
44 357 with health facilities when participants explained young people's preferences and were perceived to be  
45 358 everything that health facilities were not: fast, private and non-limiting. The extra 'procedures' required  
46 359 to obtain contraception in health facilities – which in many cases are unnecessary [27] and have been  
47 360 demonstrated in other settings to limit access[28, 29] - were especially unwelcome for young people,  
48 361 who were uninterested in extended counselling and wary of laboratory tests. As a result, pharmacy  
49 362 services were deemed more 'predictable' than those obtained in health facilities (public or private).

51 363 For Kenya, pharmacies are likely to remain a preferred choice of contraception as long as barrier  
52 364 methods and short-acting forms of contraception are popular with young people[22]. Policymakers  
53 365 should therefore recognize their role as contraception providers, especially for a community's younger  
54 366 members. Finding ways to link the myriad licensed pharmacies to focal points in public health facilities



1  
2  
3 367 could strengthen a supportive 'network' of accessible and appealing contraception services available to  
4 368 young people. A similar hub-and-spoke approach is used in the implementation of Kenya's broader  
5 369 Community Health Strategy, where community health volunteers are embedded within the community  
6 370 and report back to a facility-based community health extension worker.[30] Such a system,  
7 371 complemented by improved adolescent-friendliness of public health facilities, would also enable easier  
8 372 referral of young people to providers who can offer them more effective forms of contraception.  
9 373 However none of this can succeed without taking needed steps to improve pharmacy regulation,  
10 374 personnel training, and the overall quality of services.[31]

11  
12  
13 375 Our data revealed that shops were the second most popular source of contraception for young men.  
14 376 The reliance on shops and lower-level drug dispensaries is seen elsewhere in the region: one survey in  
15 377 Nigeria found that among young people age 15 to 24, around half sourced their contraception from  
16 378 'chemists/patent medicine shops' (a cadre of establishment below pharmacies, which does not exist in  
17 379 Kenya).[32] Unfortunately, exploring shops in further detail was beyond the scope of our data collection.  
18 380 Additional research is needed to understand how to incorporate these more informal sources into  
19 381 contraception interventions. That said, integrating them into the broader 'network' of contraception  
20 382 providers for young people will be even more challenging: lower-level drug dispensers are only  
21 383 peripherally associated with the health system in many settings, while shops are not associated at all.

22  
23 384 Finally, we must acknowledge those still left behind. Of participants who reported ever having sex,  
24 385 almost half of them (49%) had *not* used any modern contraception at last sexual intercourse. These are  
25 386 young people who are not being reached by the current network of public and private health facilities,  
26 387 pharmacies, and even neighborhood shops. They are a reminder that improving the quality of services in  
27 388 these outlets is necessary but not sufficient to address young people's contraceptive needs. There is a  
28 389 continued need for multi-sectoral interventions, including comprehensive sexuality education, to  
29 390 increase demand for contraception among youth (dispelling myths, addressing taboos and stigma, and  
30 391 increasing agency) [33], address barriers to accessing it (including community norms around  
31 392 acceptability) [3], and promote uptake of highly effective forms of contraception.

32  
33  
34 393 Young people in Coastal Kenya steadily rely on pharmacies for contraception and often prefer them to  
35 394 health facility services. Many of the pharmacy qualities most appreciated by young participants are also  
36 395 hallmarks of youth-friendly health services, which should be available in any outlet a young person  
37 396 accesses health services. [19, 34] If a young person chooses to use modern contraception, their selection  
38 397 of an outlet will be determined by several factors, including the type of contraception desired, living  
39 398 situation, and relationship status. Collaboration between health facilities and retail pharmacies at local  
40 399 levels can exchange operational strengths between these providers. Then, wherever a young person  
41 400 presents for contraceptive services, they encounter one part of a supportive network of quality  
42 401 providers.

## 43 402 **ACKNOWLEDGEMENTS**

44  
45  
46  
47  
48 403 We appreciate the support of Jefferson Mwaisaka and Winnie Wangari. Our sincere thanks to all data  
49 404 collectors and participants. The manuscript represents the view of the named authors only.

## 405 FUNDING STATEMENT

406 This work was partially supported by the UNDP/UNFPA/UNICEF/WHO/World Bank Special Programme  
407 of Research, Development and Research Training in Human Reproduction (HRP).

## 408 COMPETING INTERESTS

409 None declared

## 410 DATA AVAILABILITY STATEMENT

411 The full deidentified quantitative dataset can be made available on request to corresponding author.  
412 Qualitative data cannot be shared publicly, as consent procedures for participants did not include  
413 making full interview and focus group discussion transcripts publicly available. However, transcript  
414 excerpts are available to researchers on request from the corresponding author and following approval  
415 from the University of Nairobi/Kenyatta National Hospital Ethics Committee (contact via  
416 uonknh\_erc@uonbi.ac.ke).

## 417 AUTHOR CONTRIBUTORSHIP

418 LG conceived of the study and developed the protocol with substantive input from KW and AMH. PG,  
419 was Principal Investigator of the AMADILLO study and thereby supported LG in setting up this study's  
420 infrastructure in Kenya. LG trained and supervised data collectors, with guidance from PG. JAC and MW  
421 developed the statistical analysis plan. LG led the manuscript writing with substantive input from KW  
422 and AMH. All authors reviewed and edited drafts.

423

## 424 REFERENCES

- 425 1. MacQuarrie KLD. Unmet need for family planning among young women: Levels and trends.  
426 Rockville, MD: ICF International; 2014.
- 427 2. Chandra-Mouli V, McCarraher DR, Phillips SJ, Williamson NE, Hainsworth G. Contraception for  
428 adolescents in low and middle income countries: needs, barriers, and access. *Reproductive Health*.  
429 2014;11(1):1.
- 430 3. High-Impact Practices in Family Planning (HIPs). Adolescent-friendly contraceptive services:  
431 mainstreaming adolescent-friendly elements into existing contraceptive services. . USAID; 2015.
- 432 4. (JSI) JSI. Private Shops and Pharmacies as Providers of Family Planning. 2016.
- 433 5. Corroon M, Kebede E, Spektor G, Speizer I. Key Role of Drug Shops and Pharmacies for Family  
434 Planning in Urban Nigeria and Kenya. *Global Health: Science and Practice*. 2016;4(4):594-609.
- 435 6. High-Impact Practices in Family Planning (HIP). Drug Shops and Pharmacies: Sources for family  
436 planning commodities and information. Washington DC: USAID; 2013.
- 437 7. Ostola JC, M., Speizer I, Kebede E, Spektor G. Private sector distribution of family planning: The  
438 role of drug shops and pharmacies in urban Kenya and Nigeria. 2015.

- 1  
2  
3 439 8. Radovich E, Dennis ML, Wong KLM, Ali M, Lynch CA, Cleland J, et al. Who Meets the  
4 440 Contraceptive Needs of Young Women in Sub-Saharan Africa? *Journal of Adolescent Health*.  
5 441 2018;62(3):273-80.
- 6 442 9. Gonsalves L, Hindin MJ. Pharmacy provision of sexual and reproductive health commodities to  
7 443 young people: a systematic literature review and synthesis of the evidence. *Contraception*.  
8 444 2017;95(4):339-63.
- 9 445 10. World Health Organization. Family planning/Contraception Geneva, Switzerland: World Health  
10 446 Organization; 2018 [Available from: [https://www.who.int/news-room/fact-sheets/detail/family-](https://www.who.int/news-room/fact-sheets/detail/family-planning-contraception)  
11 447 [planning-contraception](https://www.who.int/news-room/fact-sheets/detail/family-planning-contraception).  
12 448 11. Ministry of Health/Kenya. National family planning guidelines for service providers: Updated to  
13 449 reflect the 2009 Medical Eligibility Criteria of the World Health Organization. Nairobi, Kenya: Division of  
14 450 Reproductive Health; 2010.
- 15 451 12. National Council for Law Reporting with the Authority of the Attorney-General/Kenya. Pharmacy  
16 452 and Poisons Act. Chapter 244. 1957 (revised 2012)(Cap 244).
- 17 453 13. Kwale County Government. Kwale County Integrated Development Plan (2018-2022):  
18 454 Continuing Kwale's Transformation Together 2018.
- 19 455 14. Kenya Ministry of Health. Kwale county: Health at a glance. 2015.
- 20 456 15. Gonsalves L, Hindin MJ, Bayer A, Carcamo CP, Gichangi P, Habib N, et al. Protocol of an open,  
21 457 three-arm, individually randomized trial assessing the effect of delivering sexual and reproductive health  
22 458 information to young people (aged 13–24) in Kenya and Peru via mobile phones: adolescent/youth  
23 459 reproductive mobile access and delivery initiative for love and life outcomes (ARMADILLO) study stage 2.  
24 460 *Reproductive Health*. 2018;15(1):126.
- 25 461 16. Gonsalves L, Njeri WW, Schroeder M, Mwaisaka J, Gichangi P. Research and Implementation  
26 462 Lessons Learned From a Youth-Targeted Digital Health Randomized Controlled Trial (the ARMADILLO  
27 463 Study). *JMIR Mhealth Uhealth*. 2019;7(8):e13005.
- 28 464 17. Charmaz K. Constructing grounded theory: A practical guide through qualitative analysis.  
29 465 London, UK: SAGE Publications; 2006.
- 30 466 18. Gale NK, Heath G, Cameron E, Rashid S, Redwood S. Using the framework method for the  
31 467 analysis of qualitative data in multi-disciplinary health research. *BMC Medical Research Methodology*.  
32 468 2013;13(1):117.
- 33 469 19. World Health Organization. Making health services adolescent friendly: developing national  
34 470 quality standards for adolescent friendly health services. Geneva, Switzerland: World Health  
35 471 Organization; 2012.
- 36 472 20. Riley C, Garfinkel D, Thanel K, Esch K, Workalemahu E, Anyanti J, et al. Getting to FP2020:  
37 473 Harnessing the private sector to increase modern contraceptive access and choice in Ethiopia, Nigeria,  
38 474 and DRC. *PLOS ONE*. 2018;13(2):e0192522.
- 39 475 21. The World Bank. Rural population (% of total population): World Bank staff estimates based on  
40 476 the United Nations Population Division's World Urbanization Prospects: 2018 Revision. New York, USA:  
41 477 World Bank Group; 2018 [Available from: <https://data.worldbank.org/indicator/SP.RUR.TOTL.ZS>.  
42 478 22. Kenya National Bureau of Statistics, Ministry of Health/Kenya, National AIDS Control  
43 479 Council/Kenya, Kenya Medical Research Institute, Population NCF, Development/Kenya. Kenya  
44 480 Demographic and Health Survey 2014. Rockville, MD, USA; 2015.
- 45 481 23. Marston C, Renedo A, Nyaaba GN, Machiyama K, Tapsoba P, Cleland J. Improving the  
46 482 Measurement of Fertility Regulation Practices: Findings from Qualitative Research in Ghana. *Int Perspect*  
47 483 *Sexual Reprod Health*. 2017;43(3):111-9.
- 48 484 24. International Consortium for Emergency Contraception. Counting what counts: Tracking access  
49 485 to emergency contraception - Kenya. 2013.

- 1  
2  
3 486 25. Cartwright A, Otai J, Maytan-Joneydi A, McGuire C, Sullivan E, Olumide A, et al. Access to family  
4 487 planning for youth: perspectives of young family planning leaders from 40 countries [version 1; peer  
5 488 review: 1 approved with reservations]. *Gates Open Research*. 2019;3(1513).
- 6 489 26. Peterson J, Brunie A, Diop I, Diop S, Stanback J, Chin-Quee D. Over the counter: The potential for  
7 490 easing pharmacy provision of family planning in urban Senegal [version 3; peer review: 1 approved, 2  
8 491 approved with reservations]. *Gates Open Research*. 2019;2(29).
- 9 492 27. World Health Organization. Selected practice recommendations for contraceptive use: Third  
10 493 edition. Geneva, Switzerland; 2016.
- 11 494 28. Grossman D, Ellertson C, Abuabara K, Blanchard K, Rivas FT. Barriers to contraceptive use in  
12 495 product labeling and practice guidelines. *Am J Public Health*. 2006;96(5):791-9.
- 13 496 29. Leeman L. Medical Barriers to Effective Contraception. *Obstetrics and Gynecology Clinics of*  
14 497 *North America*. 2007;34(1):19-29.
- 15 498 30. Oliver M, Geniets A, Winters N, Rega I, Mbae SM. What do community health workers have to  
16 499 say about their work, and how can this inform improved programme design? A case study with CHWs  
17 500 within Kenya. *Global Health Action*. 2015;8(1):27168.
- 18 501 31. Gonsalves L, Wyss K, Gichangi P, Say L, Martin Hilber A. Regulating pharmacists as contraception  
19 502 providers: A qualitative study from Coastal Kenya on injectable contraception provision to youth. *PLOS*  
20 503 *ONE*. 2019;14(12):e0226133.
- 21 504 32. Oye-Adeniran BA, Adewole IF, Umoh AV, Oladokun A, Gbadegesin A, Odeyemi KA, et al. Sources  
22 505 of Contraceptive Commodities for Users in Nigeria. *PLOS Medicine*. 2005;2(11):e306.
- 23 506 33. World Health Organization. Family planning evidence brief: Reducing early and unintended  
24 507 pregnancies among adolescents. Geneva, Switzerland: World Health Organization; 2017.
- 25 508 34. Erulkar AO, CJ; Phiri, A;. What is youth-friendly? Adolescents' preferences for reproductive  
26 509 health services in Kenya and Zimbabwe. *African Journal of Reproductive Health*. 2005;9(3):51-8.

510



**Supplementary Table 1 Selected characteristics of young people purchasing contraception at a pharmacy, shop, or any other source**

|                                | Pharmacy (N=153) | Shop (N=29) | Any other source (N=61) |
|--------------------------------|------------------|-------------|-------------------------|
| <b>Age</b>                     |                  |             |                         |
| 18-19                          | 27 (18%)         | 6 (21%)     | 10 (16%)                |
| 20+                            | 126 (82%)        | 23 (79%)    | 51 (84%)                |
| <b>Sex</b>                     |                  |             |                         |
| Male                           | 80 (52%)         | 24 (83%)    | 28 (46%)                |
| Female                         | 73 (48%)         | 5 (17%)     | 33 (54%)                |
| <b>Education</b>               |                  |             |                         |
| Primary or below               | 60 (39%)         | 7 (24%)     | 29 (48%)                |
| Secondary or above             | 93 (61%)         | 22 (76%)    | 32 (52%)                |
| <b>Relationship status</b>     |                  |             |                         |
| Single                         | 46 (30%)         | 10 (34%)    | 25 (41%)                |
| Dating                         | 86 (56%)         | 18 (62%)    | 11 (18%)                |
| Cohabiting/Married             | 21 (14%)         | 1 (3%)      | 25 (41%)                |
| <b>Children</b>                |                  |             |                         |
| No                             | 139 (91%)        | 28 (97%)    | 37 (61%)                |
| Yes                            | 14 (9%)          | 1 (3%)      | 24 (39%)                |
| <b>Living situation</b>        |                  |             |                         |
| Lives alone                    | 30 (20%)         | 3 (10%)     | 6 (10%)                 |
| Lives with family (dependent)  | 113 (74%)        | 25 (86%)    | 32 (53%)                |
| Lives with child or partner    | 10 (7%)          | 1 (3%)      | 23 (38%)                |
| <b>Contraception purchased</b> |                  |             |                         |
| Condom                         | 120 (78%)        | 28 (97%)    | 33 (54%)                |
| ECP                            | 24 (16%)         | 1 (3%)      | 5 (8%)                  |
| Pills/Injections               | 9 (6%)           | 0 (0%)      | 23 (38%)                |

## S1. Focus Group Discussion Guide

Today we're going to discuss what young people in this community think about contraceptives and where they go when they need it.

### Warm-up

- Tell me what “contraceptive” means to you?
  - Tell me the kinds of contraceptives you've heard of

### Myths and misinformation around contraception

**Vignette:** XXX [name determined by FGD participants] is 21 and her boyfriend YYY [name determined by FGD participants] is 23. They have been dating for awhile and are thinking about using contraceptives. However, there are things about contraceptives that they have heard from friends and family members which make them uncertain.

What are some of the things which they may have heard?

Ask participants to write down on sticky notes at least three things that XX and YY may have heard which would make them nervous. NoteTaker and Facilitator 3 will post these on the board, grouping together the similar ones. After they are all posted, moderator can ask:

- *[read out the reasons listed on the board]:* Are there any additional reasons XX and YY may feel uncertain that you can think of?
- *[also probe on certain reasons that are vague or broad]*

### Where young people get contraceptives

- Tell me about all the places in \_\_\_\_\_ (study site town), where a young person can get contraceptives? *(Facilitator 3 writes out a list)*
- Describe all the different kinds of young people you could find in your community. *(keep this short)*

For each listed contraception source:

- Describe the kind of young person who would go to a \_\_\_\_\_ if he/she needed contraceptives? *(Draw stick figure under each source name, probe on and label with identifiers: gender, marital status, etc)*  
*Facilitator 3 stops drawing after question above*
- When would a young person choose to go to a \_\_\_\_\_ to get contraceptives?
  - [Note]: what kind of contraceptives are they getting
- Why would this young person choose to go to a \_\_\_\_\_ to get contraceptives over another source?

- [Probe] What are the best qualities about \_\_\_\_\_ as a resource for contraceptives?
- What might other young people *dislike* about \_\_\_\_\_ as a resource for contraceptives?

### **Qualities of ideal FP-dispensing in *non-service sources***

- What are the most important qualities a chemist or a shop needs to have for a young person to be comfortable obtaining contraceptives? [*Probe on person working vs the shop itself*]
- What could be some reasons why young people would not be comfortable going to chemists or shops?
  - What could be done to increase the comfort of young people who might not be comfortable going to chemists or shops?
- What **other** information and services would a young person needing contraceptives from a chemist or a shop also need?
  - [*be sure to probe on information AND services separately*]
- What could be done to make sure that young people can get the extra information and services (*that group mentioned in previous question*) that they need from chemists and shops without being uncomfortable and without sacrificing their privacy and speed (*or whatever is mentioned as an important quality*).

*Close and thank people for their time*



## S2. In-Depth Interview guide for young contraception purchasers

### Warm-up

- Tell me about what life is like for young people (people your age) in this community.
- What are some of the challenges that young people face?

### As you told us earlier, you recently purchased family planning from a chemist shop nearby. I want to ask you about this experience

- Tell me about what your experience was like when purchasing FP from the chemist – how did it go, from beginning to end? [*looking for information on environment, interaction with chemists, how they were treated*]
  - How did you feel at each step?
  - What was the most difficult part of the experience?
  - What was the easiest part of the experience?
- Describe your interaction with the chemist attendant [*probe on: how were you treated? Did they give you advice*]
  - How did he/she react to your request
- Tell me about the information you were given by the chemist [*probe on: counselling, life advice, side effects, referrals other FP*]
- Tell me about what else was going on in the chemist shop while you were purchasing FP.
- How did you feel after you left the shop?
- Given the experience you've just described to me, how did that compare with what you *thought* would happen when you first walked in the chemist shop? \*

### Thinking about the time that you purchased family planning at the chemist, help me understand how you made that decision:

- What situation made you decide that you needed family planning? [*Probe on whether others were involved in this decision*]
- How did you decide what kind of family planning you wanted?
- Why did you decide to go to a chemist for family planning instead of other places?
  - Why did you select that particular chemist?
- How did this experience compare with other times you have bought family planning?

### As a young person who has purchased FP from a chemist, I am interested to hear your ideas for how chemist shops could be improved for young people:

- Were there any parts of your experience that you liked?
- Based on your experience, was there anything you would've liked to happen that didn't?
  - *Probe (if necessary):* Based on these, is there any part of the experience that you want changed?
- If you worked at the chemist, what would you do to make young clients buying family planning feel comfortable?
- If you worked at the chemist, how could you improve the shop to be more friendly to young people needing family planning?

- 1
  - 2
  - 3
  - 4
  - 5
  - 6
  - 7
  - 8
  - 9
  - 10
  - 11
  - 12
  - 13
  - 14
  - 15
  - 16
  - 17
  - 18
  - 19
  - 20
  - 21
  - 22
  - 23
  - 24
  - 25
  - 26
  - 27
  - 28
  - 29
  - 30
  - 31
  - 32
  - 33
  - 34
  - 35
  - 36
  - 37
  - 38
  - 39
  - 40
  - 41
  - 42
  - 43
  - 44
  - 45
  - 46
  - 47
  - 48
  - 49
  - 50
  - 51
  - 52
  - 53
  - 54
  - 55
  - 56
  - 57
  - 58
  - 59
  - 60
- What else do young people need to feel comfortable getting FP from chemists?

For peer review only

### S3. Key Informant Interview guide (for a person working in a pharmacy)

#### Group 1 (Background – Personal)

- Tell me about yourself and how you came to work in the chemist?
  - Probe if they are from the area
  - What is their current title?
- Tell me about the roles and responsibilities of your job - describe a typical day of work
- What are the things that you enjoy about your job?
- What are the things you do not enjoy about your job?

#### Group 2 (Background – Shop)

- Tell me about who else works at this chemist
  - Probe: what are their roles and how are they different from yours?
- Describe how the chemist shop is organized?
- When are you busiest?
  - Probe: opening hours

#### Group 3 (Family planning)

- Tell me about the family planning in this chemist shop
  - Probe: what kinds are available, most popular, price
- Tell me about the kinds of people from the community who buy these family planning
  - Probe: Describe them, what they are looking for
- Why are chemist shops like yours important in providing family planning to the community?
  - Probe: How is this job different from health facilities that also have family planning?
- If a young person comes in asking for family planning, what are some of things you look at that help you decide what to recommend?
- What are the rules for dispensing family planning?
  - Probe: are there any exceptions to these rules?
- Describe the kinds training (either from your boss or from previous training) you received about family planning?

#### Group 4 (Feelings about selling family planning to young people)

- Think about the last time that young person (18-24) came to this chemist for some kind of family planning. Can you describe the interaction, from beginning to end?
  - Probe: what happens, what would they say, what would you say, what do you give them?
- How do young customers feel coming to ask for family planning (Probe: what do they say)
- What could chemist shops like this one do to improve the comfort of young people in the community who need family planning?
- When a young customer comes in asking for family planning, how do you feel?

- 1  
2  
3           ○ Are things you would like to tell them?  
4  
5       • If you had the power, what would you do to improve the confidence of chemists to provide  
6       family planning to young people?  
7  
8  
9  
10  
11  
12  
13  
14  
15  
16  
17  
18  
19  
20  
21  
22  
23  
24  
25  
26  
27  
28  
29  
30  
31  
32  
33  
34  
35  
36  
37  
38  
39  
40  
41  
42  
43  
44  
45  
46  
47  
48  
49  
50  
51  
52  
53  
54  
55  
56  
57  
58  
59  
60
- Are things you would like to tell them?
  - If you had the power, what would you do to improve the confidence of chemists to provide family planning to young people?

For peer review only

## S4. Tool 2 – Survey Instrument (Excerpt)

**SOCIO-DEMOGRAPHIC INFORMATION. First we're going to talk about who you are.**

1. What is your sex? Mark ONLY ONE.

- 0 Male
- 1 Female

2. What is your birthdate?

Day |\_\_|\_\_|    Month |\_\_|\_\_|    Year |\_\_|\_\_|\_\_|\_\_|

3. What is the highest level of school you attended? Mark ONLY ONE.

- 0 I've never gone to school
- 1 Primary school
- 2 Secondary school
- 3 Post-secondary education – **GO TO 5**

4. What is the highest grade you completed at that level?

|\_\_|\_\_| grade/form/level – **GO TO 6**

5. What type of post-secondary education did you attend/are you attending? Mark ONLY ONE.

- 1 Technical post-secondary education
- 2 University education

6. Who do you currently live with? Mark ALL possible options.

- 0 I live alone
- 1 Father/stepfather
- 2 Mother/stepmother
- 3 Siblings
- 4 Grandparents
- 5 Other relatives

- 1  
2  
3 6 Husband or wife – **NOTE: Be sure to ask whether husband/wife or cohabiting partner.**  
4 7 Cohabiting partner  
5 8 In-laws  
6 9 Children  
7 10 Friends  
8  
9

10  
11 7. What is your current relationship status?

- 12 0 Single  
13 1 Friends with benefits  
14 2 Dating  
15 3 Cohabiting  
16 4 Engaged  
17 5 Married  
18 6 Other (specify)  
19  
20

21 8. How many children do you have?

- 22 0 I have no children – **GO TO 10**

23  
24  
25  
26  
27 |\_\_|\_\_| child/children  
28  
29

30 9. How old were you when you had your first child?

31  
32  
33 |\_\_|\_\_| years old  
34  
35

36 ...

37 [SURVEY CONTINUES]  
38

39 **ARMADILLO-RELATED BEHAVIORS. Now we're going to talk about sexual activity in order to gain a**  
40 **better understanding of some important life issues. Let me assure you again that your answers are**  
41 **completely confidential and will not be told to anyone.**  
42  
43  
44  
45

46 29. How old were you when you had sexual intercourse for the very first time?

47  
48 |\_\_|\_\_| years old  
49  
50

- 51 0 I have never had sexual intercourse – **GO TO 46**  
52

53 30. Have you ever used any method to prevent pregnancy? By use, I mean that either you, yourself,  
54 have used the method or that a partner of yours used the method when having sex with you.  
55  
56  
57  
58  
59

1  
2  
3 YES .....1  
4 NO.....0  
5  
6 DON'T KNOW.....8  
7 REFUSED .....9  
8

9  
10 31. When was the last time you had sex?

11 |\_\_|\_\_| days ago

12 |\_\_|\_\_| weeks ago

13  
14  
15  
16  
17 |\_\_|\_\_| months ago

18  
19  
20  
21 |\_\_|\_\_| years ago  
22  
23  
24  
25  
26  
27

28  
29 32. The last time you had sex, what was your relationship to this person with whom you had sexual  
30 intercourse?

- 31  
32 1 Boyfriend not living with respondent  
33 2 Girlfriend not living with respondent  
34 3 Male cohabiting partner  
35 4 Female cohabiting partner  
36 5 Husband  
37 6 Wife  
38 7 Male casual acquaintance  
39 8 Female casual acquaintance  
40 9 Male sex worker  
41 10 Female sex worker  
42 11 Female client (respondent is male sex worker)  
43 12 Male client (respondent is female sex worker)  
44 13 Male relative  
45 14 Female relative  
46  
47  
48  
49

50 33. The last time you had sex, did you or your partner use a contraceptive method?  
51

- 52 0 No – **GO TO 45**  
53 1 Yes  
54  
55

56 34. The last time you had sex, which contraceptive method did you or your partner use?  
57  
58  
59  
60

- 1 Male condom
- 2 Female condom
- 3 Birth control pill
- 4 Injectable
- 5 Implant
- 6 Intrauterine device (IUD)
- 7 Emergency contraception (the morning after pill)
- 8 Female sterilization
- 9 Male sterilization (vasectomy)
- a. Withdrawal – **GO TO 44**
- 10 Rhythm method – **GO TO 44**

35. The last time you had sex, where did you or your partner obtain the contraceptive method you used?

- 1 A pharmacy or chemist
- 2 County Hospital
- 3 Health centres
- 4 A NGO
- 5 A private doctor or clinic
- 6 A shop/market
- 7 A community-based distributor
- 8 A peer educator
- 9 A traditional healer – **GO TO 44**
- 10 A friend or relative – **GO TO 44**
- 11 A partner – **GO TO 44**
- 12 Other – **GO TO 44**

36. When you obtained your [MOST RECENT CONTRACEPTIVE METHOD], were you told by the provider about side effects of problems you might have with a method to delay or avoid getting pregnant?

- 1 Yes
- 2 No

37. Were you told what to do if you experienced side effects or problems?

- 1 Yes
- 2 No

38. At that time, were you told by the family planning provider about methods of family planning other than [MOST RECENT CONTRACEPTIVE METHOD] that you could use?

- 1 Yes
- 2 No

39. During that visit did you obtain the method you wanted to delay or avoid getting pregnant?

- 1 Yes – **GO TO 42**



2 No

40. Why didn't you obtain the method you wanted?

- 1 Method out of stock that day
- 2 Method not available at all
- 3 Provider not trained to provide the method
- 4 Provider recommended a different method
- 5 Not eligible for method
- 6 Decided not to adopt a method
- 7 Too costly
- 8 Other

41. During that visit who made the final decision about what method you got?

- 1 You alone
- 2 Provider
- 3 Partner
- 4 You and provider
- 5 You and partner
- 6 Other

42. Would you return to this provider?

- 1 Yes
- 2 No

43. Would you refer your relative or friend to this provider/facility?

- 1 Yes
- 2 No

44. How important were each of the following characteristics to you in deciding which birth control method to use? (*read item, asking*) Would you say: not at all important, slightly important, quite important or extremely important to you in choosing a method?

|                                                 | Not at all important | Slightly important | Quite important | Extremely important |
|-------------------------------------------------|----------------------|--------------------|-----------------|---------------------|
| A. It is very effective at preventing pregnancy |                      |                    |                 |                     |
| B. It has a low cost.                           |                      |                    |                 |                     |

1  
2  
3  
4  
5  
6  
7  
8  
9  
10  
11  
12  
13  
14  
15  
16  
17  
18  
19  
20  
21  
22  
23  
24  
25  
26  
27  
28  
29  
30  
31  
32  
33  
34  
35  
36  
37  
38  
39  
40  
41  
42  
43  
44  
45  
46  
47  
48  
49  
50  
51  
52  
53  
54  
55  
56  
57  
58  
59  
60

|                                                                   |  |  |  |  |
|-------------------------------------------------------------------|--|--|--|--|
| C. It is easy to use.                                             |  |  |  |  |
| D. It doesn't contain hormones.                                   |  |  |  |  |
| E. It is acceptable to my partner<br>F. It doesn't interrupt sex. |  |  |  |  |
| G. It is effective at preventing HIV or STIs.                     |  |  |  |  |

For peer review only

## Standards for Reporting Qualitative Research (SRQR)\*

<http://www.equator-network.org/reporting-guidelines/srqr/>

Page/line no(s).

### Title and abstract

|                                                                                                                                                                                                                                                              |                                                          |
|--------------------------------------------------------------------------------------------------------------------------------------------------------------------------------------------------------------------------------------------------------------|----------------------------------------------------------|
| <p><b>Title</b> - Concise description of the nature and topic of the study Identifying the study as qualitative or indicating the approach (e.g., ethnography, grounded theory) or data collection methods (e.g., interview, focus group) is recommended</p> | <p>Page 1/Line 1&amp;2 (identified as mixed methods)</p> |
| <p><b>Abstract</b> - Summary of key elements of the study using the abstract format of the intended publication; typically includes background, purpose, methods, results, and conclusions</p>                                                               | <p>Page 1-2</p>                                          |

### Introduction

|                                                                                                                                                                     |                                 |
|---------------------------------------------------------------------------------------------------------------------------------------------------------------------|---------------------------------|
| <p><b>Problem formulation</b> - Description and significance of the problem/phenomenon studied; review of relevant theory and empirical work; problem statement</p> | <p>Page 3/Line 67-73, 87-89</p> |
| <p><b>Purpose or research question</b> - Purpose of the study and specific objectives or questions</p>                                                              | <p>Page 3/Line 89-91</p>        |

### Methods

|                                                                                                                                                                                                                                                                                                                                                                                                             |                                           |
|-------------------------------------------------------------------------------------------------------------------------------------------------------------------------------------------------------------------------------------------------------------------------------------------------------------------------------------------------------------------------------------------------------------|-------------------------------------------|
| <p><b>Qualitative approach and research paradigm</b> - Qualitative approach (e.g., ethnography, grounded theory, case study, phenomenology, narrative research) and guiding theory if appropriate; identifying the research paradigm (e.g., postpositivist, constructivist/ interpretivist) is also recommended; rationale**</p>                                                                            | <p>(see response to reviewers Page 3)</p> |
| <p><b>Researcher characteristics and reflexivity</b> - Researchers' characteristics that may influence the research, including personal attributes, qualifications/experience, relationship with participants, assumptions, and/or presuppositions; potential or actual interaction between researchers' characteristics and the research questions, approach, methods, results, and/or transferability</p> | <p>Page 5/Line 166-175</p>                |
| <p><b>Context</b> - Setting/site and salient contextual factors; rationale**</p>                                                                                                                                                                                                                                                                                                                            | <p>Page 3/Line 93-98</p>                  |
| <p><b>Sampling strategy</b> - How and why research participants, documents, or events were selected; criteria for deciding when no further sampling was necessary (e.g., sampling saturation); rationale**</p>                                                                                                                                                                                              | <p>Page 4/113-147</p>                     |
| <p><b>Ethical issues pertaining to human subjects</b> - Documentation of approval by an appropriate ethics review board and participant consent, or explanation for lack thereof; other confidentiality and data security issues</p>                                                                                                                                                                        | <p>Page 5/Line151-155</p>                 |
| <p><b>Data collection methods</b> - Types of data collected; details of data collection procedures including (as appropriate) start and stop dates of data collection and analysis, iterative process, triangulation of sources/methods, and modification of procedures in response to evolving study findings; rationale**</p>                                                                             | <p>Page5/Line141-151</p>                  |

|                       |                                                                                                                                                                                                                                                       |                                                    |
|-----------------------|-------------------------------------------------------------------------------------------------------------------------------------------------------------------------------------------------------------------------------------------------------|----------------------------------------------------|
| 1<br>2<br>3<br>4<br>5 | <b>Data collection instruments and technologies</b> - Description of instruments (e.g., interview guides, questionnaires) and devices (e.g., audio recorders) used for data collection; if/how the instrument(s) changed over the course of the study | Page 5/Line 141-151 ( and Supplementary materials) |
| 6<br>7<br>8           | <b>Units of study</b> - Number and relevant characteristics of participants, documents, or events included in the study; level of participation (could be reported in results)                                                                        | Page 4/Table 1<br>Page 9/Line 243-254              |
| 9<br>10<br>11<br>12   | <b>Data processing</b> - Methods for processing data prior to and during analysis, including transcription, data entry, data management and security, verification of data integrity, data coding, and anonymization/de-identification of excerpts    | Page 6/Line192-194                                 |
| 13<br>14<br>15<br>16  | <b>Data analysis</b> - Process by which inferences, themes, etc., were identified and developed, including the researchers involved in data analysis; usually references a specific paradigm or approach; rationale**                                 | Page6/Line194-203                                  |
| 17<br>18<br>19<br>20  | <b>Techniques to enhance trustworthiness</b> - Techniques to enhance trustworthiness and credibility of data analysis (e.g., member checking, audit trail, triangulation); rationale**                                                                | Page 6/Line193-194                                 |

## Results/findings

|                                  |                                                                                                                                                                                                   |                                        |
|----------------------------------|---------------------------------------------------------------------------------------------------------------------------------------------------------------------------------------------------|----------------------------------------|
| 21<br>22<br>23<br>24<br>25<br>26 | <b>Synthesis and interpretation</b> - Main findings (e.g., interpretations, inferences, and themes); might include development of a theory or model, or integration with prior research or theory | Page 9/From Line 255 to end of section |
| 27<br>28<br>29                   | <b>Links to empirical data</b> - Evidence (e.g., quotes, field notes, text excerpts, photographs) to substantiate analytic findings                                                               | Page 9/Table 4                         |

## Discussion

|                                                    |                                                                                                                                                                                                                                                                                                                                                                                                             |                                   |
|----------------------------------------------------|-------------------------------------------------------------------------------------------------------------------------------------------------------------------------------------------------------------------------------------------------------------------------------------------------------------------------------------------------------------------------------------------------------------|-----------------------------------|
| 30<br>31<br>32<br>33<br>34<br>35<br>36<br>37<br>38 | <b>Integration with prior work, implications, transferability, and contribution(s) to the field</b> - Short summary of main findings; explanation of how findings and conclusions connect to, support, elaborate on, or challenge conclusions of earlier scholarship; discussion of scope of application/generalizability; identification of unique contribution(s) to scholarship in a discipline or field | Page 12/Entire discussion section |
| 39<br>40                                           | <b>Limitations</b> - Trustworthiness and limitations of findings                                                                                                                                                                                                                                                                                                                                            | Page12/Line316-328                |

## Other

|                            |                                                                                                                                               |                     |
|----------------------------|-----------------------------------------------------------------------------------------------------------------------------------------------|---------------------|
| 41<br>42<br>43<br>44<br>45 | <b>Conflicts of interest</b> - Potential sources of influence or perceived influence on study conduct and conclusions; how these were managed | Page 14/Line 405    |
| 46<br>47<br>48             | <b>Funding</b> - Sources of funding and other support; role of funders in data collection, interpretation, and reporting                      | Page 14/Line402-403 |

\*The authors created the SRQR by searching the literature to identify guidelines, reporting standards, and critical appraisal criteria for qualitative research; reviewing the reference lists of retrieved sources; and contacting experts to gain feedback. The SRQR aims to improve the transparency of all aspects of qualitative research by providing clear standards for reporting qualitative research.

1  
2  
3  
4  
5  
6  
7  
8  
9  
10  
11  
12  
13  
14  
15  
16  
17  
18  
19  
20  
21  
22  
23  
24  
25  
26  
27  
28  
29  
30  
31  
32  
33  
34  
35  
36  
37  
38  
39  
40  
41  
42  
43  
44  
45  
46  
47  
48  
49  
50  
51  
52  
53  
54  
55  
56  
57  
58  
59  
60

\*\*The rationale should briefly discuss the justification for choosing that theory, approach, method, or technique rather than other options available, the assumptions and limitations implicit in those choices, and how those choices influence study conclusions and transferability. As appropriate, the rationale for several items might be discussed together.

**Reference:**

O'Brien BC, Harris IB, Beckman TJ, Reed DA, Cook DA. **Standards for reporting qualitative research: a synthesis of recommendations.** *Academic Medicine*, Vol. 89, No. 9 / Sept 2014  
DOI: 10.1097/ACM.0000000000000388

For peer review only

## STROBE Statement—checklist of items that should be included in reports of observational studies

|                           | Item No. | Recommendation                                                                                                                                                                             | Page No.               | Relevant text from manuscript                                                                                                                                       |
|---------------------------|----------|--------------------------------------------------------------------------------------------------------------------------------------------------------------------------------------------|------------------------|---------------------------------------------------------------------------------------------------------------------------------------------------------------------|
| <b>Title and abstract</b> | 1        | (a) Indicate the study's design with a commonly used term in the title or the abstract                                                                                                     | 1                      | Title                                                                                                                                                               |
|                           |          | (b) Provide in the abstract an informative and balanced summary of what was done and what was found                                                                                        | 1-2                    | Abstract                                                                                                                                                            |
| <b>Introduction</b>       |          |                                                                                                                                                                                            |                        |                                                                                                                                                                     |
| Background/rationale      | 2        | Explain the scientific background and rationale for the investigation being reported                                                                                                       | 3                      | Paragraph 1-4 of Introduction                                                                                                                                       |
| Objectives                | 3        | State specific objectives, including any prespecified hypotheses                                                                                                                           | 3                      | "Therefore, this mixed methods study sought to answer two questions..."                                                                                             |
| <b>Methods</b>            |          |                                                                                                                                                                                            |                        |                                                                                                                                                                     |
| Study design              | 4        | Present key elements of study design early in the paper                                                                                                                                    | 3-4                    | "This analysis was part of a broader, mixed-methods study describing how young people (aged 18-24) in Kwale County obtain contraception from pharmacies." + Table 1 |
| Setting                   | 5        | Describe the setting, locations, and relevant dates, including periods of recruitment, exposure, follow-up, and data collection                                                            | 4-5                    | Table 1 + Methods text                                                                                                                                              |
| Participants              | 6        | (a) <i>Cohort study</i> —Give the eligibility criteria, and the sources and methods of selection of participants. Describe methods of follow-up                                            | 4<br>(cross-sectional) | Table 1, "In October 2017, data collectors enumerated all households..."                                                                                            |
|                           |          | <i>Case-control study</i> —Give the eligibility criteria, and the sources and methods of case ascertainment and control selection. Give the rationale for the choice of cases and controls |                        |                                                                                                                                                                     |
|                           |          | <i>Cross-sectional study</i> —Give the eligibility criteria, and the sources and methods of selection of participants                                                                      |                        |                                                                                                                                                                     |
|                           |          | (b) <i>Cohort study</i> —For matched studies, give matching criteria and number of exposed and unexposed                                                                                   |                        | N/A                                                                                                                                                                 |
|                           |          | <i>Case-control study</i> —For matched studies, give matching criteria and the number of controls per case                                                                                 |                        |                                                                                                                                                                     |

|                              |     |                                                                                                                                                                                                                                                                                                           |     |                                                                                                                        |
|------------------------------|-----|-----------------------------------------------------------------------------------------------------------------------------------------------------------------------------------------------------------------------------------------------------------------------------------------------------------|-----|------------------------------------------------------------------------------------------------------------------------|
| Variables                    | 7   | Clearly define all outcomes, exposures, predictors, potential confounders, and effect modifiers. Give diagnostic criteria, if applicable                                                                                                                                                                  | 6   | Analysis section                                                                                                       |
| Data sources/<br>measurement | 8*  | For each variable of interest, give sources of data and details of methods of assessment (measurement). Describe comparability of assessment methods if there is more than one group                                                                                                                      | N/A | Not included beyond primary outcome (to leave space to discuss qual methods)                                           |
| Bias                         | 9   | Describe any efforts to address potential sources of bias                                                                                                                                                                                                                                                 | 5   | “Data collectors entered responses save...”                                                                            |
| Study size                   | 10  | Explain how the study size was arrived at                                                                                                                                                                                                                                                                 | 4   | “The sample size was calculated based on the ARMADILLO trial’s primary outcome...”                                     |
| Quantitative variables       | 11  | Explain how quantitative variables were handled in the analyses. If applicable, describe which groupings were chosen and why                                                                                                                                                                              | 6   | Analysis section – for primary outcome                                                                                 |
| Statistical methods          | 12  | (a) Describe all statistical methods, including those used to control for confounding                                                                                                                                                                                                                     | 6   | Analysis section                                                                                                       |
|                              |     | (b) Describe any methods used to examine subgroups and interactions                                                                                                                                                                                                                                       | N/A | Based on primary outcome, no subgroups were examined                                                                   |
|                              |     | (c) Explain how missing data were addressed                                                                                                                                                                                                                                                               | N/A | Not included (to leave space to discuss qual methods)                                                                  |
|                              |     | (d) <i>Cohort study</i> —If applicable, explain how loss to follow-up was addressed<br><i>Case-control study</i> —If applicable, explain how matching of cases and controls was addressed<br><i>Cross-sectional study</i> —If applicable, describe analytical methods taking account of sampling strategy | N/A | N/A                                                                                                                    |
|                              |     | (e) Describe any sensitivity analyses                                                                                                                                                                                                                                                                     | N/A | N/A                                                                                                                    |
| <b>Results</b>               |     |                                                                                                                                                                                                                                                                                                           |     |                                                                                                                        |
| Participants                 | 13* | (a) Report numbers of individuals at each stage of study—eg numbers potentially eligible, examined for eligibility, confirmed eligible, included in the study, completing follow-up, and analysed                                                                                                         | N/A | Not included (to leave space to discuss qual methods – reference describing this in detail is included [15] on page 4) |
|                              |     | (b) Give reasons for non-participation at each stage                                                                                                                                                                                                                                                      | N/A | Not applicable (cross-section)                                                                                         |

|                          |     |                                                                                                                                                                                                              |       |                                                                                                                                           |
|--------------------------|-----|--------------------------------------------------------------------------------------------------------------------------------------------------------------------------------------------------------------|-------|-------------------------------------------------------------------------------------------------------------------------------------------|
|                          |     | (c) Consider use of a flow diagram                                                                                                                                                                           | N/A   | Not included (to leave space to discuss qual methods – reference to open source article with this information is included [15] on page 4) |
| Descriptive data         | 14* | (a) Give characteristics of study participants (eg demographic, clinical, social) and information on exposures and potential confounders                                                                     | 6-7   | Table 2                                                                                                                                   |
|                          |     | (b) Indicate number of participants with missing data for each variable of interest                                                                                                                          | N/A   | None for primary outcome                                                                                                                  |
|                          |     | (c) <i>Cohort study</i> —Summarise follow-up time (eg, average and total amount)                                                                                                                             |       |                                                                                                                                           |
| Outcome data             | 15* | <i>Cohort study</i> —Report numbers of outcome events or summary measures over time                                                                                                                          |       |                                                                                                                                           |
|                          |     | <i>Case-control study</i> —Report numbers in each exposure category, or summary measures of exposure                                                                                                         |       |                                                                                                                                           |
|                          |     | <i>Cross-sectional study</i> —Report numbers of outcome events or summary measures                                                                                                                           | 8     | Table 3                                                                                                                                   |
| Main results             | 16  | (a) Give unadjusted estimates and, if applicable, confounder-adjusted estimates and their precision (eg, 95% confidence interval). Make clear which confounders were adjusted for and why they were included | 8-9   | Table 3                                                                                                                                   |
|                          |     | (b) Report category boundaries when continuous variables were categorized                                                                                                                                    | 8-9   | Table 3                                                                                                                                   |
|                          |     | (c) If relevant, consider translating estimates of relative risk into absolute risk for a meaningful time period                                                                                             | N/A   | N/A                                                                                                                                       |
| Other analyses           | 17  | Report other analyses done—eg analyses of subgroups and interactions, and sensitivity analyses                                                                                                               | N/A   | N/A                                                                                                                                       |
| <b>Discussion</b>        |     |                                                                                                                                                                                                              |       |                                                                                                                                           |
| Key results              | 18  | Summarise key results with reference to study objectives                                                                                                                                                     | 11-12 | Discussion paragraph 1                                                                                                                    |
| Limitations              | 19  | Discuss limitations of the study, taking into account sources of potential bias or imprecision. Discuss both direction and magnitude of any potential bias                                                   | 11-12 | Discussion paragraph 2                                                                                                                    |
| Interpretation           | 20  | Give a cautious overall interpretation of results considering objectives, limitations, multiplicity of analyses, results from similar studies, and other relevant evidence                                   | 12    | Discussion section paragraph 3-4                                                                                                          |
| Generalisability         | 21  | Discuss the generalisability (external validity) of the study results                                                                                                                                        | 12    | Discussion section paragraph 3                                                                                                            |
| <b>Other information</b> |     |                                                                                                                                                                                                              |       |                                                                                                                                           |
| Funding                  | 22  | Give the source of funding and the role of the funders for the present study and, if applicable, for the original study on which the present article is based                                                | 14    | Funding statement                                                                                                                         |



1  
2  
3  
4  
5  
6  
7  
8  
9  
10  
11  
12  
13  
14  
15  
16  
17  
18  
19  
20  
21  
22  
23  
24  
25  
26  
27  
28  
29  
30  
31  
32  
33  
34  
35  
36  
37  
38  
39  
40  
41  
42  
43  
44  
45  
46

\*Give information separately for cases and controls in case-control studies and, if applicable, for exposed and unexposed groups in cohort and cross-sectional studies.

**Note:** An Explanation and Elaboration article discusses each checklist item and gives methodological background and published examples of transparent reporting. The STROBE checklist is best used in conjunction with this article (freely available on the Web sites of PLoS Medicine at <http://www.plosmedicine.org/>, Annals of Internal Medicine at <http://www.annals.org/>, and Epidemiology at <http://www.epidem.com/>). Information on the STROBE Initiative is available at [www.strobe-statement.org](http://www.strobe-statement.org).

For peer review only
