# Supplementary material for: Mixed-methods study on pharmacies as contraception providers to Kenyan young people: who uses them and why?
Source: PubMed Central journal article supplement (PMC7348460; doi:10.1136/bmjopen-2019-034769), 2020-07-08
Supplement: bmjopen-2019-034769supp004.pdf [file bmjopen-2019-034769supp004.pdf]

## S4. Tool 2 – Survey Instrument (Excerpt)

### SOCIO-DEMOGRAPHIC INFORMATION. First we're going to talk about who you are.

1. What is your sex? Mark ONLY ONE.

- 0 Male
- 1 Female

2. What is your birthdate?

Day |\_\_|\_\_|    Month |\_\_|\_\_|    Year |\_\_|\_\_|\_\_|\_\_|

3. What is the highest level of school you attended? Mark ONLY ONE.

- 0 I've never gone to school
- 1 Primary school
- 2 Secondary school
- 3 Post-secondary education – **GO TO 5**

4. What is the highest grade you completed at that level?

|\_\_|\_\_| grade/form/level – **GO TO 6**

5. What type of post-secondary education did you attend/are you attending? Mark ONLY ONE.

- 1 Technical post-secondary education
- 2 University education

6. Who do you currently live with? Mark ALL possible options.

- 0 I live alone
- 1 Father/stepfather
- 2 Mother/stepmother
- 3 Siblings
- 4 Grandparents
- 5 Other relatives

- 6 Husband or wife – **NOTE: Be sure to ask whether husband/wife or cohabiting partner.**
- 7 Cohabiting partner
- 8 In-laws
- 9 Children
- 10 Friends

7. What is your current relationship status?

- 0 Single
- 1 Friends with benefits
- 2 Dating
- 3 Cohabiting
- 4 Engaged
- 5 Married
- 6 Other (specify)

8. How many children do you have?

- 0 I have no children – **GO TO 10**

|\_|\_| child/children

9. How old were you when you had your first child?

|\_|\_| years old

...

[SURVEY CONTINUES]

**ARMADILLO-RELATED BEHAVIORS. Now we're going to talk about sexual activity in order to gain a better understanding of some important life issues. Let me assure you again that your answers are completely confidential and will not be told to anyone.**

29. How old were you when you had sexual intercourse for the very first time?

|\_|\_| years old

- 0 I have never had sexual intercourse – **GO TO 46**

30. Have you ever used any method to prevent pregnancy? By use, I mean that either you, yourself, have used the method or that a partner of yours used the method when having sex with you.

YES .....1  
NO.....0  
DON'T KNOW.....8  
REFUSED .....9

31. When was the last time you had sex?

|\_|\_| days ago

|\_|\_| weeks ago

|\_|\_| months ago

|\_|\_| years ago

32. The last time you had sex, what was your relationship to this person with whom you had sexual intercourse?

- 1 Boyfriend not living with respondent
- 2 Girlfriend not living with respondent
- 3 Male cohabiting partner
- 4 Female cohabiting partner
- 5 Husband
- 6 Wife
- 7 Male casual acquaintance
- 8 Female casual acquaintance
- 9 Male sex worker
- 10 Female sex worker
- 11 Female client (respondent is male sex worker)
- 12 Male client (respondent is female sex worker)
- 13 Male relative
- 14 Female relative

33. The last time you had sex, did you or your partner use a contraceptive method?

- 0 No – **GO TO 45**
- 1 Yes

34. The last time you had sex, which contraceptive method did you or your partner use?

- 1 Male condom
  - 2 Female condom
  - 3 Birth control pill
  - 4 Injectable
  - 5 Implant
  - 6 Intrauterine device (IUD)
  - 7 Emergency contraception (the morning after pill)
  - 8 Female sterilization
  - 9 Male sterilization (vasectomy)
  - a. Withdrawal – **GO TO 44**
  - 10 Rhythm method – **GO TO 44**
35. The last time you had sex, where did you or your partner obtain the contraceptive method you used?
- 1 A pharmacy or chemist
  - 2 County Hospital
  - 3 Health centres
  - 4 A NGO
  - 5 A private doctor or clinic
  - 6 A shop/market
  - 7 A community-based distributor
  - 8 A peer educator
  - 9 A traditional healer – **GO TO 44**
  - 10 A friend or relative – **GO TO 44**
  - 11 A partner – **GO TO 44**
  - 12 Other – **GO TO 44**
36. When you obtained your [MOST RECENT CONTRACEPTIVE METHOD], were you told by the provider about side effects of problems you might have with a method to delay or avoid getting pregnant?
- 1 Yes
  - 2 No
37. Were you told what to do if you experienced side effects or problems?
- 1 Yes
  - 2 No
38. At that time, were you told by the family planning provider about methods of family planning other than [MOST RECENT CONTRACEPTIVE METHOD] that you could use?
- 1 Yes
  - 2 No
39. During that visit did you obtain the method you wanted to delay or avoid getting pregnant?
- 1 Yes – **GO TO 42**

2 No

40. Why didn't you obtain the method you wanted?

- 1 Method out of stock that day
- 2 Method not available at all
- 3 Provider not trained to provide the method
- 4 Provider recommended a different method
- 5 Not eligible for method
- 6 Decided not to adopt a method
- 7 Too costly
- 8 Other

41. During that visit who made the final decision about what method you got?

- 1 You alone
- 2 Provider
- 3 Partner
- 4 You and provider
- 5 You and partner
- 6 Other

42. Would you return to this provider?

- 1 Yes
- 2 No

43. Would you refer your relative or friend to this provider/facility?

- 1 Yes
- 2 No

44. How important were each of the following characteristics to you in deciding which birth control method to use? (*read item, asking*) Would you say: not at all important, slightly important, quite important or extremely important to you in choosing a method?

|                                                 | Not at all important | Slightly important | Quite important | Extremely important |
|-------------------------------------------------|----------------------|--------------------|-----------------|---------------------|
| A. It is very effective at preventing pregnancy |                      |                    |                 |                     |
| B. It has a low cost.                           |                      |                    |                 |                     |

|                                                                   |  |  |  |  |
|-------------------------------------------------------------------|--|--|--|--|
| C. It is easy to use.                                             |  |  |  |  |
| D. It doesn't contain hormones.                                   |  |  |  |  |
| E. It is acceptable to my partner<br>F. It doesn't interrupt sex. |  |  |  |  |
| G. It is effective at preventing HIV or STIs.                     |  |  |  |  |
