# Supplementary material for: Mixed-methods study on pharmacies as contraception providers to Kenyan young people: who uses them and why?
Source: PubMed Central journal article supplement (PMC7348460; doi:10.1136/bmjopen-2019-034769), 2020-07-08
Supplement: bmjopen-2019-034769supp005.pdf [file bmjopen-2019-034769supp005.pdf]

**Supplementary Table 1 Selected characteristics of young people purchasing contraception at a pharmacy, shop, or any other source**

|                                | Pharmacy (N=153) | Shop (N=29) | Any other source (N=61) |
|--------------------------------|------------------|-------------|-------------------------|
| <b>Age</b>                     |                  |             |                         |
| 18-19                          | 27 (18%)         | 6 (21%)     | 10 (16%)                |
| 20+                            | 126 (82%)        | 23 (79%)    | 51 (84%)                |
| <b>Sex</b>                     |                  |             |                         |
| Male                           | 80 (52%)         | 24 (83%)    | 28 (46%)                |
| Female                         | 73 (48%)         | 5 (17%)     | 33 (54%)                |
| <b>Education</b>               |                  |             |                         |
| Primary or below               | 60 (39%)         | 7 (24%)     | 29 (48%)                |
| Secondary or above             | 93 (61%)         | 22 (76%)    | 32 (52%)                |
| <b>Relationship status</b>     |                  |             |                         |
| Single                         | 46 (30%)         | 10 (34%)    | 25 (41%)                |
| Dating                         | 86 (56%)         | 18 (62%)    | 11 (18%)                |
| Cohabiting/Married             | 21 (14%)         | 1 (3%)      | 25 (41%)                |
| <b>Children</b>                |                  |             |                         |
| No                             | 139 (91%)        | 28 (97%)    | 37 (61%)                |
| Yes                            | 14 (9%)          | 1 (3%)      | 24 (39%)                |
| <b>Living situation</b>        |                  |             |                         |
| Lives alone                    | 30 (20%)         | 3 (10%)     | 6 (10%)                 |
| Lives with family (dependent)  | 113 (74%)        | 25 (86%)    | 32 (53%)                |
| Lives with child or partner    | 10 (7%)          | 1 (3%)      | 23 (38%)                |
| <b>Contraception purchased</b> |                  |             |                         |
| Condom                         | 120 (78%)        | 28 (97%)    | 33 (54%)                |
| ECP                            | 24 (16%)         | 1 (3%)      | 5 (8%)                  |
| Pills/Injections               | 9 (6%)           | 0 (0%)      | 23 (38%)                |
